# Supplementary material for: A feedback loop between the androgen receptor and 6-phosphogluoconate dehydrogenase (6PGD) drives prostate cancer growth
Source: eLife. 2021 Aug 12;10:e62592. doi: 10.7554/eLife.62592 (PMC8416027; doi:10.7554/eLife.62592)
Supplement: Figure 1—source data 1. [file elife-62592-fig1-data1.xlsx]

## Sheet: siAR vs siNC
Symbol	Ensembl Gene ID	logFC	logCPM	FDR
OPRK1	ENSG00000082556	3.36172	4.14327	1.36994e-13
PGD	ENSG00000142657	-1.87929	8.16978	4.2118e-13
ST6GALNAC1	ENSG00000070526	-2.641	3.945	4.70044e-12
LAMA1	ENSG00000101680	-3.1765	3.55969	1.10021e-11
NKX3-1	ENSG00000167034	-2.24047	7.99173	1.10021e-11
SLC45A3	ENSG00000158715	-2.52884	6.68352	1.10021e-11
C1ORF116	ENSG00000182795	-1.82447	6.88595	1.30142e-11
ATP1B1	ENSG00000143153	1.4609	9.23055	5.83875e-11
CHRNA2	ENSG00000120903	-3.83437	3.40256	8.15173e-11
YWHAH	ENSG00000128245	1.51169	6.18766	1.60866e-10
MFSD6	ENSG00000151690	1.66727	4.65461	1.69243e-10
TMPRSS2	ENSG00000184012	-1.55359	6.98251	1.69243e-10
ADAM7	ENSG00000069206	-3.6329	3.3751	1.74347e-10
GRB10	ENSG00000106070	1.32478	8.24043	1.75859e-10
KLK3	ENSG00000142515	-2.24107	8.07693	2.76849e-10
AR	ENSG00000169083	-2.39211	8.07827	3.90966e-10
HERC3	ENSG00000138641	-1.6989	6.97362	5.20823e-10
KCNMA1	ENSG00000156113	-1.39538	5.92349	5.44176e-10
STK39	ENSG00000198648	-1.31218	6.51054	5.44176e-10
COLEC12	ENSG00000158270	1.35088	6.15312	5.48868e-10
PMEPA1	ENSG00000124225	-1.34181	5.76215	6.25241e-10
TMEM41B	ENSG00000166471	-1.42444	6.07814	6.25241e-10
PLA2G2A	ENSG00000188257	2.11307	4.53752	6.60248e-10
GDF11	ENSG00000135414	1.65053	4.682	8.26875e-10
GRIK1	ENSG00000171189	2.93373	2.92601	8.38399e-10
HMMR	ENSG00000072571	-1.91277	6.80503	8.74597e-10
MYB	ENSG00000118513	2.13863	3.58851	1.23208e-09
ALDH1A3	ENSG00000184254	-1.47881	4.78048	1.42101e-09
EMP2	ENSG00000213853	1.45511	5.41114	1.48476e-09
STEAP3	ENSG00000115107	2.00161	4.13525	1.48476e-09
SESN1	ENSG00000080546	1.24236	6.90205	2.03993e-09
TRGC1	ENSG00000211689	-2.96917	2.99304	2.03993e-09
ARHGEF26	ENSG00000114790	-1.42472	7.49822	2.09083e-09
NUDT15	ENSG00000136159	1.28994	5.34277	2.09083e-09
JOSD1	ENSG00000100221	-1.26751	5.9137	2.45823e-09
COL5A2	ENSG00000204262	2.48289	2.81417	2.62446e-09
DDC	ENSG00000132437	1.29023	7.57853	2.65361e-09
LSM14A	ENSG00000257103	1.25748	7.06201	2.65361e-09
TOP1MT	ENSG00000184428	1.61663	5.01632	2.65361e-09
TLN1	ENSG00000137076	1.50607	6.9485	2.91422e-09
SLC39A6	ENSG00000141424	-1.24407	7.8884	3.1379e-09
SYS1	ENSG00000204070	1.6348	5.11716	3.1379e-09
SNU13	ENSG00000100138	-1.59417	7.64024	3.54809e-09
C5ORF66	ENSG00000224186	1.31184	5.35652	3.61902e-09
TAOK3	ENSG00000135090	-1.76446	5.59155	3.6253e-09
DENND6A	ENSG00000174839	-1.74689	4.97808	3.67642e-09
KLK4	ENSG00000167749	-1.25993	6.03606	3.67642e-09
GNB1	ENSG00000078369	0.93205	8.81427	3.76972e-09
GHR	ENSG00000112964	-1.9062	4.16608	4.39902e-09
THG1L	ENSG00000113272	1.7805	3.63847	5.70721e-09
LAMP2	ENSG00000005893	1.11324	7.80568	6.91062e-09
TRPM8	ENSG00000144481	-3.05448	3.12487	8.10393e-09
CBLN2	ENSG00000141668	1.9077	3.80906	8.63277e-09
KLK2	ENSG00000167751	-2.76908	5.81398	9.74293e-09
F5	ENSG00000198734	-2.22825	4.18258	1.12662e-08
MBOAT2	ENSG00000143797	-1.3598	6.90925	1.28924e-08
GFM1	ENSG00000168827	-1.05641	6.77504	1.32061e-08
ST5	ENSG00000166444	1.34952	4.20632	1.39633e-08
KCNN2	ENSG00000080709	-0.974609	5.89816	1.40999e-08
COX11	ENSG00000166260	-1.04198	5.64722	1.55674e-08
IQGAP2	ENSG00000145703	-1.6051	5.06855	1.65612e-08
AGO4	ENSG00000134698	1.50028	4.81557	1.72235e-08
UAP1	ENSG00000117143	-1.08925	7.5394	1.72235e-08
LL22NC03-N64E9.1	ENSG00000271127	-1.5914	4.18488	1.98481e-08
RP11-244H18.1	ENSG00000276888	-3.20959	1.87944	1.98481e-08
LPAR3	ENSG00000171517	-0.947201	6.32609	2.02915e-08
METTL16	ENSG00000127804	1.03722	5.98522	2.06489e-08
ENDOD1	ENSG00000149218	-1.02179	7.89445	2.25495e-08
CPNE2	ENSG00000140848	1.6238	3.41042	2.29272e-08
SIPA1L2	ENSG00000116991	-1.47126	5.04698	2.29272e-08
SORD	ENSG00000140263	-0.866028	8.77094	2.29272e-08
TMTC2	ENSG00000179104	-1.89233	3.79009	2.29272e-08
ZNF812P	ENSG00000224689	-2.99539	2.00089	2.37902e-08
SCAMP1	ENSG00000085365	1.40189	6.04492	2.43997e-08
VPS37A	ENSG00000155975	-1.50613	5.54807	2.60212e-08
DHX40	ENSG00000108406	1.14868	5.79208	2.7251e-08
GPR158	ENSG00000151025	-1.47111	5.93545	2.86124e-08
INSIG2	ENSG00000125629	1.32737	5.1236	3.1125e-08
TPM4	ENSG00000167460	-0.984732	6.53877	3.1125e-08
FAM98A	ENSG00000119812	-1.60211	5.74817	3.64936e-08
MYO1B	ENSG00000128641	-1.59593	5.6684	3.68336e-08
DEGS1	ENSG00000143753	-1.00059	8.20687	3.88265e-08
GBAS	ENSG00000146729	-1.0772	6.58298	3.88265e-08
NREP	ENSG00000134986	-1.08801	6.03668	4.03645e-08
OACYLP	ENSG00000224367	-2.28663	2.40784	4.03645e-08
HOMER2	ENSG00000103942	-0.847148	6.70948	4.08458e-08
PCNX2	ENSG00000135749	-1.15621	5.3594	4.1529e-08
MTMR9	ENSG00000104643	-1.54777	5.2629	4.27538e-08
SLC19A2	ENSG00000117479	-1.14139	5.98133	4.80229e-08
UBE2E3	ENSG00000170035	-1.10673	5.79354	5.11639e-08
HOXC13-AS	ENSG00000249641	1.43843	2.73935	5.23203e-08
VGLL4	ENSG00000144560	1.24537	6.28885	5.32323e-08
AADAT	ENSG00000109576	-1.37431	5.93776	5.78041e-08
F2R	ENSG00000181104	1.67527	3.79702	5.97382e-08
ALCAM	ENSG00000170017	1.4071	6.33367	6.32528e-08
CHPF	ENSG00000123989	2.04466	6.3044	6.5101e-08
AMIGO2	ENSG00000139211	1.75178	2.83017	6.666e-08
PXYLP1	ENSG00000155893	2.05261	2.17359	7.49938e-08
PEX10	ENSG00000157911	-1.2782	7.16606	7.53259e-08
ACKR3	ENSG00000144476	0.960515	6.60941	9.59945e-08
JAKMIP1	ENSG00000152969	1.39262	3.82138	1.10606e-07
RCAN3	ENSG00000117602	0.922094	5.65421	1.1661e-07
MTHFD2	ENSG00000065911	-0.815514	7.34355	1.21343e-07
SORD2P	ENSG00000259479	-0.768623	7.68351	1.23632e-07
CRKL	ENSG00000099942	-0.924205	6.19369	1.24172e-07
SOX9	ENSG00000125398	1.55046	4.00838	1.24172e-07
SNAP23	ENSG00000092531	-1.29001	5.51035	1.25254e-07
DUSP5	ENSG00000138166	1.72898	2.08039	1.28563e-07
IL1RN	ENSG00000136689	1.7974	3.0821	1.28563e-07
ABHD2	ENSG00000140526	-1.1475	8.49237	1.32794e-07
INPP4B	ENSG00000109452	-1.64191	3.22569	1.33125e-07
EFCAB12	ENSG00000172771	-1.59133	2.76155	1.49926e-07
ELOVL5	ENSG00000012660	-1.10311	7.93014	1.5186e-07
ATPAF1	ENSG00000123472	0.829339	7.35536	1.64365e-07
MED28	ENSG00000118579	0.857229	6.01781	1.64365e-07
MID1	ENSG00000101871	1.93196	1.8797	1.82577e-07
RHOU	ENSG00000116574	-1.11489	5.43316	1.82577e-07
TRIM49D2	ENSG00000233802	-2.3871	2.88395	1.82577e-07
ABCG1	ENSG00000160179	1.56639	4.18732	1.90448e-07
NADK2	ENSG00000152620	0.782802	7.48019	1.91868e-07
SAMD4B	ENSG00000179134	-1.09777	6.33577	2.0254e-07
DIO1	ENSG00000211452	1.38486	3.57367	2.0255e-07
SLC22A10	ENSG00000184999	1.34795	3.11252	2.09695e-07
IGF1R	ENSG00000140443	-1.61556	4.46203	2.1202e-07
TMEM50B	ENSG00000142188	0.93715	5.64933	2.18364e-07
PLXDC2	ENSG00000120594	1.6433	3.6938	2.29662e-07
ELL2	ENSG00000118985	-0.971426	6.26889	2.32214e-07
SPIN1	ENSG00000106723	-0.939589	6.28202	2.35052e-07
ERH	ENSG00000100632	-1.06301	7.91649	2.36469e-07
AMOTL1	ENSG00000166025	1.87415	2.57831	2.4055e-07
GUSBP1	ENSG00000183666	0.877391	4.8988	2.41178e-07
CD24	ENSG00000272398	1.43416	3.70913	2.43699e-07
RP11-379B18.5	ENSG00000241288	1.68277	2.99295	2.64116e-07
CYP11A1	ENSG00000140459	-1.89182	1.74679	2.70455e-07
DNMT1	ENSG00000130816	0.843295	7.55034	2.84526e-07
RTF1	ENSG00000137815	0.905187	6.48322	2.95172e-07
SRCIN1	ENSG00000277363	1.87991	3.84201	3.26991e-07
TRIM49D1	ENSG00000223417	-2.59838	2.92587	3.47279e-07
TTF2	ENSG00000116830	-1.20321	5.67726	3.56217e-07
TMX3	ENSG00000166479	-1.26758	5.28247	3.7469e-07
CITED2	ENSG00000164442	0.779275	6.1963	3.80594e-07
SHCBP1	ENSG00000171241	-0.811663	6.0135	4.01891e-07
CSMD1	ENSG00000183117	1.27056	5.87494	4.03816e-07
EGLN3	ENSG00000129521	0.888324	4.62317	4.0528e-07
NDFIP2	ENSG00000102471	-1.10588	5.63365	4.0528e-07
RASSF3	ENSG00000153179	-0.885736	8.19967	4.0528e-07
NPC1	ENSG00000141458	-0.771636	6.2799	4.18338e-07
FOXO3	ENSG00000118689	1.10849	6.86995	4.24474e-07
GALNT18	ENSG00000110328	1.20435	4.69557	4.34655e-07
ENC1	ENSG00000171617	0.849569	5.39762	4.38216e-07
AIDA	ENSG00000186063	1.22853	8.78486	4.46239e-07
OCLN	ENSG00000197822	0.990885	6.63608	4.71519e-07
PPFIBP2	ENSG00000166387	-0.97455	5.25537	4.76387e-07
KIAA0100	ENSG00000007202	0.979903	8.38993	4.83978e-07
PDE12	ENSG00000174840	-0.882613	6.03663	5.20302e-07
GPER1	ENSG00000164850	1.1138	4.49978	5.29092e-07
LNPEP	ENSG00000113441	-1.28894	5.76969	5.34203e-07
DAPK2	ENSG00000035664	1.23776	3.59886	5.4703e-07
NUCB2	ENSG00000070081	0.99163	7.37684	5.82362e-07
PRPF3	ENSG00000117360	0.897929	5.905	5.82362e-07
ANO10	ENSG00000160746	1.06181	4.73163	5.86111e-07
CROT	ENSG00000005469	-1.14334	4.72125	5.88125e-07
ZBTB10	ENSG00000205189	-1.11677	5.61522	5.88125e-07
ABCG2	ENSG00000118777	2.18535	1.98384	6.08608e-07
RP11-315E17.1	ENSG00000258162	1.41914	5.50347	6.13093e-07
MCCC2	ENSG00000131844	-0.996779	8.72645	6.47777e-07
PAK1IP1	ENSG00000111845	-1.01916	5.57278	6.61886e-07
CDH3	ENSG00000062038	1.35378	3.83151	6.99482e-07
PGRMC2	ENSG00000164040	0.889088	6.36444	6.99482e-07
MAOA	ENSG00000189221	-0.869744	7.92758	7.93587e-07
SLC7A2	ENSG00000003989	1.17716	5.45523	7.98852e-07
FBXO38	ENSG00000145868	-1.26521	4.98235	8.57671e-07
RNF41	ENSG00000181852	-0.684722	6.80808	8.65839e-07
PBX1	ENSG00000185630	1.11352	4.6162	9.03045e-07
TMEM2	ENSG00000135048	-0.885135	5.21324	9.19696e-07
ZNF385B	ENSG00000144331	-1.87612	2.41078	1.00166e-06
NT5DC2	ENSG00000168268	0.943939	7.61715	1.03241e-06
AFF3	ENSG00000144218	-1.43433	3.19712	1.05381e-06
SGK223	ENSG00000275342	-1.63375	2.46599	1.12784e-06
COBL	ENSG00000106078	1.00607	5.26455	1.13949e-06
FAM13A-AS1	ENSG00000248019	-1.96487	2.4672	1.1537e-06
CTD-2314B22.1	ENSG00000258314	-2.0758	3.08705	1.16444e-06
LMAN1	ENSG00000074695	-1.01031	7.42219	1.16805e-06
SELENBP1	ENSG00000143416	0.902005	9.12152	1.20336e-06
MPZL3	ENSG00000160588	-1.00506	5.10625	1.22529e-06
DHCR24	ENSG00000116133	-0.920823	10.1158	1.2475e-06
PRPS1	ENSG00000147224	-0.620194	7.10551	1.28836e-06
ERLIN1	ENSG00000107566	-1.00413	4.41139	1.29097e-06
GLUL	ENSG00000135821	0.584856	7.33203	1.32424e-06
CCNG2	ENSG00000138764	0.856694	5.61928	1.3658e-06
SS18	ENSG00000141380	0.725706	6.0491	1.38559e-06
HOXC13	ENSG00000123364	1.22738	4.20217	1.39758e-06
CLU	ENSG00000120885	0.898894	5.1006	1.45272e-06
NDN	ENSG00000182636	1.18885	4.92641	1.47364e-06
RALB	ENSG00000144118	0.782962	5.6384	1.5886e-06
ACPP	ENSG00000014257	1.07079	5.34084	1.59103e-06
THRB	ENSG00000151090	-1.04858	5.141	1.59138e-06
EHD3	ENSG00000013016	1.01527	4.18141	1.61608e-06
EIF4E3	ENSG00000163412	1.63376	3.20222	1.61608e-06
MAPK6	ENSG00000069956	-1.16568	7.09069	1.61608e-06
SMIM3	ENSG00000256235	1.70605	1.68219	1.65542e-06
LINC01297	ENSG00000225255	-2.4052	3.98557	1.71768e-06
ICMT	ENSG00000116237	0.607219	7.07838	1.74928e-06
ZYX	ENSG00000159840	1.22393	5.67785	2.19433e-06
TP53INP1	ENSG00000164938	0.789532	7.67212	2.27707e-06
CCNA2	ENSG00000145386	-0.758887	6.18892	2.38775e-06
IDI1	ENSG00000067064	-0.853115	7.1306	2.38775e-06
PRC1	ENSG00000198901	0.709313	6.87179	2.40249e-06
RBBP7	ENSG00000102054	-0.686949	7.01758	2.43697e-06
RSPRY1	ENSG00000159579	1.01032	5.48944	2.48857e-06
NIPSNAP3A	ENSG00000136783	0.763286	7.16628	2.5037e-06
MRPL50	ENSG00000136897	-1.14356	5.58094	2.53825e-06
GNAI1	ENSG00000127955	-0.964935	4.65615	2.60498e-06
MYLK	ENSG00000065534	2.29182	2.36235	2.63102e-06
ASRGL1	ENSG00000162174	-1.16687	4.0831	2.69806e-06
CRYM	ENSG00000103316	-1.83291	1.21259	2.70999e-06
ASAP2	ENSG00000151693	0.949063	5.09817	2.73912e-06
SAR1B	ENSG00000152700	0.70139	7.03901	2.80173e-06
TNRC6A	ENSG00000090905	1.17167	6.35061	2.85925e-06
TMEM164	ENSG00000157600	-0.750843	5.54779	3.02819e-06
PLPP5	ENSG00000147535	-0.766965	6.88495	3.04875e-06
SNHG16	ENSG00000163597	-0.620329	7.99471	3.1095e-06
LGI2	ENSG00000153012	1.17676	2.95535	3.1366e-06
DOCK9	ENSG00000088387	1.29557	4.63558	3.1413e-06
CLIC4	ENSG00000169504	1.06125	6.23204	3.22117e-06
AGR2	ENSG00000106541	-2.04687	2.44519	3.33628e-06
NOL9	ENSG00000162408	-0.673809	6.13093	3.33628e-06
C1QTNF6	ENSG00000133466	1.43155	3.49125	3.40928e-06
FHOD3	ENSG00000134775	1.00736	3.15048	3.43647e-06
IL6ST	ENSG00000134352	1.43469	5.83581	3.65397e-06
LAPTM4B	ENSG00000104341	0.873567	5.55941	4.01371e-06
THBS1	ENSG00000137801	-0.987054	3.88064	4.01371e-06
RP11-115D19.1	ENSG00000251095	-1.6832	2.29949	4.06612e-06
SDHC	ENSG00000143252	-0.69462	7.25093	4.28961e-06
TWF1	ENSG00000151239	-1.34809	7.04476	4.37492e-06
GALNT10	ENSG00000164574	0.746569	6.08086	4.38262e-06
KIAA1324	ENSG00000116299	1.31414	2.50383	4.38262e-06
UBE2G2	ENSG00000184787	0.633172	7.20153	4.38262e-06
C3ORF58	ENSG00000181744	-1.0987	3.8545	4.40305e-06
SSH2	ENSG00000141298	-0.811356	4.4566	4.48979e-06
KLHL28	ENSG00000179454	-1.37896	4.5838	4.61667e-06
ANTXR1	ENSG00000169604	1.16672	3.86865	4.63092e-06
CENPN	ENSG00000166451	-0.62569	6.52686	4.74546e-06
ACSL3	ENSG00000123983	-0.787132	7.58057	4.77241e-06
SCD5	ENSG00000145284	0.860622	4.48115	4.78742e-06
TACC2	ENSG00000138162	0.824569	6.28592	4.78748e-06
ERMP1	ENSG00000099219	0.893732	5.18082	4.82832e-06
SS18L1	ENSG00000184402	0.904566	5.08215	4.92173e-06
SEPT1	ENSG00000100167	0.84627	5.5673	4.98101e-06
MEIS1	ENSG00000143995	-1.32026	2.24776	4.98101e-06
ARHGEF3	ENSG00000163947	2.03716	0.993783	5.03807e-06
LRRC20	ENSG00000172731	0.836058	6.13412	5.1037e-06
ZNF587B	ENSG00000269343	-0.945217	4.47531	5.32265e-06
TMEM184B	ENSG00000198792	0.963174	6.0103	5.36897e-06
CAMK2N1	ENSG00000162545	0.806272	9.18248	5.74461e-06
CTD-2562J17.6	ENSG00000279117	0.692821	4.36197	5.87193e-06
PAM	ENSG00000145730	1.35802	1.81442	5.90984e-06
ZFYVE9	ENSG00000157077	1.01956	4.94022	6.12074e-06
PIGZ	ENSG00000119227	1.77435	1.56741	6.29349e-06
RIMS4	ENSG00000101098	1.47034	2.77935	6.29349e-06
GUSBP9	ENSG00000215630	0.97324	3.15645	6.38709e-06
SPRYD7	ENSG00000123178	-0.85536	4.50176	6.55513e-06
LRRN1	ENSG00000175928	1.00469	5.73933	6.67445e-06
ATF3	ENSG00000162772	-0.910877	5.21369	6.77495e-06
FGD1	ENSG00000102302	1.48083	1.48446	6.96707e-06
ZCCHC9	ENSG00000131732	-0.944583	4.60759	7.11764e-06
KIAA0040	ENSG00000235750	-1.25027	2.84708	7.12344e-06
PACRG	ENSG00000112530	2.06777	0.965897	7.50973e-06
ULK3	ENSG00000140474	-1.0856	5.6058	7.50973e-06
ELOVL7	ENSG00000164181	-1.06239	5.63035	7.68529e-06
GNB4	ENSG00000114450	-1.59582	4.07719	8.2489e-06
UBE2W	ENSG00000104343	-0.788972	4.86877	8.33526e-06
MALL	ENSG00000144063	-0.866338	4.1253	8.54734e-06
FDFT1	ENSG00000079459	-0.647651	8.51487	9.22227e-06
TP53	ENSG00000141510	0.767546	7.44191	9.27569e-06
CTSH	ENSG00000103811	0.743735	7.65449	9.38913e-06
AP004372.1	ENSG00000238117	1.99253	1.7204	9.42328e-06
DBT	ENSG00000137992	-0.682987	7.02925	9.54428e-06
MYCBP2	ENSG00000005810	-1.2986	6.81133	9.54775e-06
EHBP1L1	ENSG00000173442	1.42136	2.83661	9.55825e-06
FHDC1	ENSG00000137460	-1.04316	4.32288	9.84544e-06
PLPP2	ENSG00000141934	1.03914	5.82457	1.00914e-05
EXTL2	ENSG00000162694	-0.910361	3.91823	1.03897e-05
ADRA2A	ENSG00000150594	0.942811	4.88882	1.04802e-05
MRPS6	ENSG00000243927	0.999086	5.05349	1.08403e-05
TK2	ENSG00000166548	0.751709	5.15897	1.10398e-05
SPCS3	ENSG00000129128	-0.615135	6.98947	1.12862e-05
INSIG1	ENSG00000186480	-0.563745	7.72658	1.15834e-05
ACAT2	ENSG00000120437	-0.637052	7.09068	1.16112e-05
BMX	ENSG00000102010	1.094	2.54955	1.16112e-05
CCDC80	ENSG00000091986	2.15718	1.08519	1.16112e-05
HOOK1	ENSG00000134709	-0.930081	5.80754	1.17622e-05
TMTC3	ENSG00000139324	-1.17529	5.25968	1.17674e-05
S1PR3	ENSG00000213694	1.47308	2.36327	1.18985e-05
UGT2B17	ENSG00000197888	-0.958729	7.23028	1.18985e-05
DSG2	ENSG00000046604	-1.09905	7.39188	1.23842e-05
HPGD	ENSG00000164120	-2.40698	1.15726	1.26568e-05
MANBA	ENSG00000109323	0.671944	5.0654	1.26568e-05
NT5DC3	ENSG00000111696	-0.891753	4.64415	1.26568e-05
FAM212B	ENSG00000197852	1.24898	3.06312	1.27045e-05
LMBRD1	ENSG00000168216	-0.837159	4.67321	1.27045e-05
FAM174B	ENSG00000185442	-0.789295	5.59207	1.27926e-05
FUT8	ENSG00000033170	0.838479	4.11706	1.28042e-05
HMGCS1	ENSG00000112972	-0.63593	7.64951	1.29188e-05
RAB3B	ENSG00000169213	-0.988066	5.63224	1.29188e-05
GLCE	ENSG00000138604	0.985245	3.86796	1.34685e-05
ZNF551	ENSG00000204519	-1.12021	3.71669	1.36012e-05
PASK	ENSG00000115687	-0.675722	5.88692	1.36469e-05
RAB15	ENSG00000139998	0.767723	4.62102	1.43348e-05
KAT5	ENSG00000172977	0.702758	5.46796	1.43834e-05
RAPGEF2	ENSG00000109756	-1.39652	4.33076	1.4641e-05
CDK14	ENSG00000058091	1.08161	5.10686	1.50356e-05
RNPS1	ENSG00000205937	0.688146	7.99739	1.52515e-05
PTBP3	ENSG00000119314	0.792937	5.8679	1.55406e-05
CFAP69	ENSG00000105792	0.988354	4.70216	1.55942e-05
ELF4	ENSG00000102034	1.26469	2.34525	1.62892e-05
PMS2CL	ENSG00000187953	0.722525	5.07062	1.71732e-05
PIAS2	ENSG00000078043	0.677534	5.57635	1.76397e-05
CA12	ENSG00000074410	0.838578	4.95945	1.7646e-05
PPAT	ENSG00000128059	-0.736251	6.54668	1.82981e-05
NDUFAF4	ENSG00000123545	0.794849	5.84277	1.83085e-05
MAFB	ENSG00000204103	-0.688454	5.88716	1.84726e-05
NINL	ENSG00000101004	1.05049	2.71222	1.84726e-05
RPS6KA3	ENSG00000177189	-1.09647	5.31149	1.8654e-05
AC020571.3	ENSG00000229056	-1.86104	1.83245	1.99211e-05
NOX5	ENSG00000255346	-1.48855	1.68765	1.99211e-05
POLR3E	ENSG00000058600	0.676488	5.79407	1.99211e-05
CCDC125	ENSG00000183323	-0.696506	5.42877	2.00996e-05
HEBP2	ENSG00000051620	-0.769394	7.25659	2.0468e-05
CENPA	ENSG00000115163	-1.12112	4.3757	2.05519e-05
HSPA5	ENSG00000044574	-0.551058	10.2768	2.08148e-05
TAF9B	ENSG00000187325	-0.810576	5.86437	2.1133e-05
KALRN	ENSG00000160145	2.23549	1.23029	2.14501e-05
HNRNPD	ENSG00000138668	0.627652	8.33079	2.21111e-05
FKBP9	ENSG00000122642	0.787354	4.91207	2.22449e-05
LINC01137	ENSG00000233621	1.0527	3.53729	2.25282e-05
GSTCD	ENSG00000138780	-0.981194	4.66429	2.25672e-05
ANXA9	ENSG00000143412	1.15907	3.08237	2.2766e-05
SEPT5	ENSG00000184702	0.872083	5.68515	2.28251e-05
C5ORF22	ENSG00000082213	-0.852542	5.64792	2.29186e-05
RTN4RL1	ENSG00000185924	1.65509	2.86932	2.29186e-05
SLC12A2	ENSG00000064651	0.891929	6.21083	2.37795e-05
ASS1	ENSG00000130707	0.639578	5.65284	2.39985e-05
DSC2	ENSG00000134755	-0.954632	5.23682	2.44487e-05
BLZF1	ENSG00000117475	0.887634	5.2325	2.4775e-05
ACE2	ENSG00000130234	-1.94334	1.37502	2.51305e-05
MT1F	ENSG00000198417	1.33487	4.19389	2.58776e-05
EIF3F	ENSG00000175390	0.667125	7.70544	2.62468e-05
GNG4	ENSG00000168243	1.4221	2.00664	2.69258e-05
PLCD3	ENSG00000161714	0.955076	3.37266	2.69258e-05
FAM84B	ENSG00000168672	-0.635331	6.46506	2.8604e-05
NAV3	ENSG00000067798	-0.885788	3.69862	2.89095e-05
MAF	ENSG00000178573	-1.23456	2.94975	2.90864e-05
TMPO	ENSG00000120802	-0.642422	7.55591	2.92995e-05
MAP2	ENSG00000078018	-0.961866	4.1162	2.94067e-05
CBX6	ENSG00000183741	-1.28652	7.77252	2.96784e-05
PRKCH	ENSG00000027075	-1.00684	3.95895	3.05921e-05
ZNF680	ENSG00000173041	0.953091	5.37182	3.07746e-05
ZNF552	ENSG00000178935	-0.73163	4.30692	3.09891e-05
BTN3A2	ENSG00000186470	-0.954321	3.36932	3.27425e-05
GLUD1	ENSG00000148672	-0.495437	6.82163	3.2813e-05
CORO2A	ENSG00000106789	-0.673936	4.82273	3.31421e-05
HSD17B4	ENSG00000133835	-0.590753	7.61882	3.31421e-05
NEK7	ENSG00000151414	0.992728	5.18543	3.31421e-05
TNRC6C	ENSG00000078687	0.864919	4.83765	3.31421e-05
CASK	ENSG00000147044	0.575317	5.859	3.37484e-05
HIST1H4E	ENSG00000276966	1.19359	2.25404	3.38619e-05
FKBP5	ENSG00000096060	-0.660629	6.39943	3.47382e-05
DCBLD2	ENSG00000057019	0.856511	3.66596	3.49817e-05
DPYSL2	ENSG00000092964	0.695	5.07975	3.49817e-05
EPHB2	ENSG00000133216	1.15837	2.60781	3.49817e-05
WHAMM	ENSG00000156232	0.660243	4.00437	3.49817e-05
RP11-419L20.2	ENSG00000254185	-1.72855	1.12523	3.57082e-05
ACSF2	ENSG00000167107	1.21124	2.47903	3.64389e-05
HBEGF	ENSG00000113070	0.881649	3.22814	3.72166e-05
TDP1	ENSG00000042088	0.559121	5.70224	3.73792e-05
HS6ST1	ENSG00000136720	0.884119	5.56206	3.87006e-05
EPN2	ENSG00000072134	-0.706378	5.18996	3.89672e-05
INIP	ENSG00000148153	-0.683996	5.5704	3.89672e-05
ADPRM	ENSG00000170222	-0.960878	2.69831	3.90678e-05
ACBD3	ENSG00000182827	0.598689	5.93604	4.1129e-05
FOSB	ENSG00000125740	1.66126	0.308067	4.1129e-05
TMEM138	ENSG00000149483	0.624059	5.19378	4.11943e-05
RAB14	ENSG00000119396	0.639683	6.85223	4.16504e-05
PHF12	ENSG00000109118	0.731738	7.09611	4.27824e-05
CNGA1	ENSG00000198515	1.66966	1.63634	4.28204e-05
RP11-1081M5.1	ENSG00000253369	0.752673	4.27398	4.28628e-05
GLS	ENSG00000115419	-0.623725	5.88583	4.35612e-05
DCUN1D3	ENSG00000188215	-0.934374	3.79828	4.45429e-05
PLA2G16	ENSG00000176485	0.81183	5.72691	4.49777e-05
RP11-39H3.2	ENSG00000278965	-2.02111	0.704672	4.51817e-05
NCOA7	ENSG00000111912	0.883537	5.65516	4.53993e-05
SGTA	ENSG00000104969	0.648048	7.49699	4.70405e-05
CDK8	ENSG00000132964	0.698264	5.09015	4.76254e-05
CNGB3	ENSG00000170289	-2.09072	1.35571	4.76254e-05
GARNL3	ENSG00000136895	1.09826	2.87014	4.76254e-05
TSPAN3	ENSG00000140391	0.544188	6.96427	4.78593e-05
CD164	ENSG00000135535	-0.690834	7.99166	4.79811e-05
ZFAND6	ENSG00000086666	0.698503	5.7618	4.86117e-05
NDUFB4P12	ENSG00000124399	0.999417	2.99799	4.88468e-05
CORO1C	ENSG00000110880	0.486177	6.25331	4.90512e-05
TOMM34	ENSG00000025772	0.591358	6.67396	4.94326e-05
TRPS1	ENSG00000104447	0.893709	4.74564	4.94326e-05
TMEM230	ENSG00000089063	-0.5732	7.05318	5.0614e-05
ORC5	ENSG00000164815	-0.690742	5.79139	5.07645e-05
MAPK3	ENSG00000102882	0.605771	5.54056	5.12676e-05
PPM1L	ENSG00000163590	1.15737	2.75338	5.12676e-05
SSFA2	ENSG00000138434	-0.709535	6.59958	5.13025e-05
FGFR1	ENSG00000077782	0.859844	3.45819	5.15525e-05
TMEM254-AS1	ENSG00000230091	1.08453	3.16798	5.22361e-05
RAB11FIP4	ENSG00000131242	0.599634	5.07935	5.33364e-05
C9ORF152	ENSG00000188959	-0.939629	3.50468	5.3752e-05
RING1	ENSG00000204227	0.624894	5.29041	5.41383e-05
MAK	ENSG00000111837	-2.1061	0.902615	5.44606e-05
BMF	ENSG00000104081	0.802221	3.90525	5.48318e-05
KLKP1	ENSG00000197588	-1.19033	2.07732	5.52171e-05
EVI5	ENSG00000067208	-0.877909	4.52122	5.63686e-05
MFHAS1	ENSG00000147324	-0.674083	5.21618	5.6688e-05
RELL1	ENSG00000181826	1.1716	3.0547	5.81001e-05
TMEM41A	ENSG00000163900	0.563956	5.27787	5.81062e-05
ARNT2	ENSG00000172379	0.830505	4.21902	5.90697e-05
C1QTNF3	ENSG00000082196	1.37845	1.85596	5.91387e-05
PRR15L	ENSG00000167183	-0.618175	4.63715	6.35241e-05
RP11-378J18.8	ENSG00000272750	1.33987	1.4285	6.35241e-05
SRRM2-AS1	ENSG00000205913	1.01636	2.78253	6.36974e-05
STXBP5L	ENSG00000145087	0.804801	6.4876	6.36974e-05
CREB3L4	ENSG00000143578	-0.737634	5.89743	6.48418e-05
TMEM59	ENSG00000116209	0.55186	7.48106	6.53634e-05
SSBP2	ENSG00000145687	0.80791	4.27331	6.62767e-05
P4HA2	ENSG00000072682	0.626457	4.37285	6.71144e-05
MRAS	ENSG00000158186	0.847165	3.14874	6.71886e-05
ENO2	ENSG00000111674	0.871641	4.28235	6.76796e-05
LINC01128	ENSG00000228794	-0.78812	5.10101	6.83679e-05
METRNL	ENSG00000176845	1.37436	1.92027	6.93233e-05
AOC2	ENSG00000131480	-0.837692	3.42177	6.96739e-05
SLC41A1	ENSG00000133065	0.742309	5.60766	6.96739e-05
GOLPH3	ENSG00000113384	-0.503816	6.95916	7.45506e-05
SLIT1	ENSG00000187122	1.85657	1.55599	7.45506e-05
PRKCA	ENSG00000154229	0.85525	3.89144	7.60396e-05
TFPI	ENSG00000003436	-0.983895	5.30134	7.74467e-05
GABRA3	ENSG00000011677	0.97243	2.37881	7.93191e-05
DUSP27	ENSG00000198842	-1.77016	1.54476	7.9386e-05
SLC25A36	ENSG00000114120	-0.77068	6.18514	8.02078e-05
NSMAF	ENSG00000035681	-0.641101	5.27504	8.04986e-05
MPC2	ENSG00000143158	-0.706089	8.3305	8.39187e-05
BTN3A3	ENSG00000111801	-0.710755	3.91914	8.54571e-05
MRPS26	ENSG00000125901	-0.834743	6.62487	8.54571e-05
MTURN	ENSG00000180354	0.748978	3.95922	8.57438e-05
ADCY1	ENSG00000164742	0.882247	4.11383	8.63681e-05
CHMP5	ENSG00000086065	-0.617569	5.75769	8.63681e-05
GPD2	ENSG00000115159	-0.777815	5.95729	8.73952e-05
DHFR2	ENSG00000178700	-0.740295	3.90725	8.85061e-05
CTNNA1	ENSG00000044115	-0.469258	8.14775	8.96543e-05
RP11-629O1.2	ENSG00000261220	0.875797	3.3289	8.96543e-05
PIK3R3	ENSG00000117461	0.492944	6.68845	9.00752e-05
RASSF4	ENSG00000107551	1.19936	1.88082	9.02543e-05
TLL1	ENSG00000038295	1.23085	3.41302	9.0991e-05
CD2AP	ENSG00000198087	-0.894495	6.37857	9.10298e-05
SMAD9	ENSG00000120693	-0.65598	4.76518	9.12987e-05
SLC16A14	ENSG00000163053	-0.759199	5.12415	9.2877e-05
ZBTB16	ENSG00000109906	-1.57944	3.19263	9.36837e-05
MCC	ENSG00000171444	1.45862	1.79779	9.38091e-05
METAP1	ENSG00000164024	-0.570678	5.84391	9.42252e-05
TMEM97	ENSG00000109084	-0.43405	7.53343	9.43524e-05
FBXO2	ENSG00000116661	1.14465	4.53375	9.45039e-05
DNAJC24	ENSG00000170946	-1.13823	2.77613	9.45227e-05
SYTL2	ENSG00000137501	0.834572	4.79156	9.45227e-05
CABLES1	ENSG00000134508	0.733687	4.36806	9.467e-05
TRPV6	ENSG00000165125	-0.654036	4.23996	9.47803e-05
NPTXR	ENSG00000221890	0.75655	4.42603	9.47993e-05
CECR1	ENSG00000093072	1.01838	1.65871	9.70538e-05
MYH15	ENSG00000144821	-2.04431	0.620091	9.70538e-05
PLEKHB1	ENSG00000021300	0.460466	7.02501	9.74674e-05
RBM15B	ENSG00000259956	0.528073	7.21079	9.92713e-05
SMARCD3	ENSG00000082014	0.792074	4.39489	0.000100054
CDH24	ENSG00000139880	1.18828	3.60472	0.000102345
WLS	ENSG00000116729	0.604453	4.92638	0.000102356
COL6A2	ENSG00000142173	0.751412	4.69046	0.000102377
XRN1	ENSG00000114127	-1.11034	5.42349	0.000102445
TMEM79	ENSG00000163472	-0.969317	3.90367	0.000102554
C19ORF48	ENSG00000167747	-0.955779	8.00033	0.000103976
STRBP	ENSG00000165209	0.586622	6.74872	0.000104856
ZMIZ1	ENSG00000108175	-0.830318	5.99126	0.00010731
FAM177B	ENSG00000197520	1.6733	0.850317	0.000112187
THAP7-AS1	ENSG00000230513	0.91023	3.96164	0.000112187
CAB39L	ENSG00000102547	-0.567775	6.76313	0.000112682
DDX41	ENSG00000183258	0.49694	6.62265	0.000113009
CLN5	ENSG00000102805	-0.633289	5.06628	0.000116468
GABRB3	ENSG00000166206	-0.755842	5.52026	0.000117926
ZBTB5	ENSG00000168795	-0.649273	5.03694	0.000118188
NUP50	ENSG00000093000	-0.5313	6.75847	0.00011878
MAPRE2	ENSG00000166974	0.689426	4.91407	0.00012042
FZD5	ENSG00000163251	-0.731219	4.76351	0.000121586
STOX1	ENSG00000165730	1.30007	1.74307	0.000121586
ABCA1	ENSG00000165029	1.3434	1.57899	0.000126525
ANKH	ENSG00000154122	-0.477376	6.53105	0.000127272
CNTN5	ENSG00000149972	1.48456	1.61938	0.000128448
DHRS2	ENSG00000100867	-0.839562	3.26798	0.000130284
H1F0	ENSG00000189060	-0.46153	7.35792	0.000130493
RHOB	ENSG00000143878	0.611525	7.12451	0.000132114
GRAMD1C	ENSG00000178075	0.7644	3.70271	0.000133837
AMD1	ENSG00000123505	-0.757319	9.46129	0.000134573
ADGRG6	ENSG00000112414	0.791719	8.41334	0.000136713
RUNDC3A-AS1	ENSG00000267750	1.14342	2.72697	0.000136713
PDIA5	ENSG00000065485	-0.59991	5.87751	0.000137366
SBNO1	ENSG00000139697	0.747399	6.86589	0.000137501
MPHOSPH9	ENSG00000051825	-0.798378	5.92769	0.000138697
C5ORF30	ENSG00000181751	0.639627	5.70071	0.000139299
PINK1	ENSG00000158828	0.719065	5.59736	0.000139299
XPR1	ENSG00000143324	0.804379	5.30298	0.000141321
LIN7A	ENSG00000111052	-1.23222	2.554	0.000141534
PACS2	ENSG00000179364	0.74765	5.8723	0.000141534
TAPT1	ENSG00000169762	0.553939	5.14186	0.000141534
SSR3	ENSG00000114850	-0.49239	8.2871	0.000141646
INHBB	ENSG00000163083	1.36203	1.38741	0.000143089
RP11-44F14.8	ENSG00000262714	1.52641	2.29575	0.000143808
AZGP1	ENSG00000160862	-0.750943	4.88052	0.000143822
CHST15	ENSG00000182022	1.79636	0.932817	0.000145407
KEAP1	ENSG00000079999	-0.799242	6.71192	0.000147918
PARG	ENSG00000227345	-0.74794	5.41356	0.000151505
GLO1	ENSG00000124767	0.605306	8.07196	0.000155438
TGFBR1	ENSG00000106799	0.766524	4.49928	0.000155438
FKBP9P1	ENSG00000176826	0.855475	2.40986	0.000156474
LRIG1	ENSG00000144749	-0.582025	5.97496	0.000157136
HOXC9	ENSG00000180806	0.953972	3.24304	0.000159071
POLD3	ENSG00000077514	0.578411	4.73454	0.000159561
RP11-181C21.4	ENSG00000219201	1.03385	2.57468	0.000160862
RP11-513I15.6	ENSG00000225339	1.32695	2.48827	0.000160862
SPOPL	ENSG00000144228	0.678399	4.95905	0.000160862
TP53TG1	ENSG00000182165	-0.941694	4.84515	0.000160862
TWF1P1	ENSG00000178082	-1.21487	2.50919	0.000160862
CIPC	ENSG00000198894	0.628843	5.41836	0.000162054
IL17RD	ENSG00000144730	1.09286	2.6319	0.000162054
APH1A	ENSG00000117362	-0.748656	6.72504	0.000162244
TMEM229B	ENSG00000198133	1.57649	1.71215	0.000162244
CASP4	ENSG00000196954	-0.927771	3.76819	0.000162355
LPCAT1	ENSG00000153395	0.471532	6.87001	0.000162888
BMPR1B	ENSG00000138696	-1.43793	1.58886	0.000165266
QKI	ENSG00000112531	0.80017	5.10223	0.000165266
SVIL	ENSG00000197321	1.02775	3.83933	0.000165266
GALNT11	ENSG00000178234	-0.539559	6.13516	0.000166746
ARHGEF25	ENSG00000240771	1.40011	1.55487	0.0001684
C11ORF95	ENSG00000188070	0.962064	2.86919	0.000168794
DCP1A	ENSG00000272886	-0.653259	5.29223	0.000168794
PTGFRN	ENSG00000134247	0.535421	6.56135	0.00017073
KLF15	ENSG00000163884	-1.12095	3.39556	0.000172779
LINC00094	ENSG00000235106	0.613343	5.6345	0.000172779
NDRG2	ENSG00000165795	0.542803	5.75831	0.000172779
CD59	ENSG00000085063	0.602618	5.67523	0.000172831
OPTN	ENSG00000123240	0.942603	2.18427	0.000172831
HACL1	ENSG00000131373	0.55573	6.19129	0.000173108
SLC29A2	ENSG00000174669	-0.650674	4.93771	0.000174717
PRRC1	ENSG00000164244	-0.511429	6.6105	0.000174802
TMEM159	ENSG00000011638	0.772136	4.41849	0.000175297
GPC4	ENSG00000076716	0.763486	3.10415	0.000184631
RANBP3L	ENSG00000164188	1.01917	3.6885	0.000188184
RIMS3	ENSG00000117016	1.46983	1.6518	0.000188184
EFHC2	ENSG00000183690	1.10813	2.37678	0.000189529
STYK1	ENSG00000060140	-0.773783	3.36669	0.000192362
DEFB132	ENSG00000186458	-0.940262	3.20748	0.000193943
ELOVL1	ENSG00000066322	-0.462408	6.78828	0.000195217
SIKE1	ENSG00000052723	-0.667002	5.65433	0.00019656
ZMYND10	ENSG00000004838	1.25861	1.5923	0.00019656
DPP4	ENSG00000197635	-1.03293	3.21349	0.000197288
ASAH1	ENSG00000104763	-0.467802	7.4318	0.000198003
HIPK1	ENSG00000163349	0.632333	6.26201	0.000202424
ZCCHC3	ENSG00000247315	0.56228	4.76674	0.000202424
CYB5R2	ENSG00000166394	1.48665	1.66619	0.000203947
STARD3NL	ENSG00000010270	-0.626016	5.18092	0.000203947
NCAPG	ENSG00000109805	-0.506099	6.25675	0.000205505
RP11-342D14.1	ENSG00000229491	1.65997	0.98833	0.000209582
CACNA2D2	ENSG00000007402	1.38494	2.13974	0.000211876
AUTS2	ENSG00000158321	1.35339	2.107	0.000211917
BBS4	ENSG00000140463	-0.578946	5.22338	0.000212865
MIR4453	ENSG00000268471	-0.956194	3.79283	0.000215369
TTYH1	ENSG00000167614	-1.69799	0.593791	0.000217291
BICD2	ENSG00000185963	-0.675783	5.02091	0.000218114
RELN	ENSG00000189056	1.15173	3.60933	0.000219692
CTIF	ENSG00000134030	0.870255	2.94472	0.00022004
PARP8	ENSG00000151883	0.777565	4.26846	0.00022209
ZBED4	ENSG00000100426	0.643798	5.80659	0.000222188
BIRC2	ENSG00000110330	-0.696714	5.14056	0.000222337
MED29	ENSG00000063322	0.42247	6.90814	0.000222659
C6ORF132	ENSG00000188112	-0.86826	5.10812	0.000229101
GOLT1B	ENSG00000111711	-0.551989	4.65236	0.000229101
ZNF263	ENSG00000006194	0.441766	5.54971	0.000229101
DUSP4	ENSG00000120875	-0.70156	4.14042	0.000230992
MAPK8	ENSG00000107643	-0.568099	5.1197	0.000230992
ZNF618	ENSG00000157657	0.928655	4.65553	0.000230992
DUBR	ENSG00000243701	-0.920978	3.05114	0.000232369
PPP1R18	ENSG00000146112	1.25605	1.73856	0.000232369
DDX18	ENSG00000088205	0.434351	6.96043	0.000232741
GRIN2C	ENSG00000161509	1.41744	1.67831	0.000232741
IPO11	ENSG00000086200	0.759355	5.06285	0.000235652
PLD1	ENSG00000075651	1.13433	2.32189	0.000235652
YES1	ENSG00000176105	0.631217	6.12018	0.000235652
FLVCR1	ENSG00000162769	-0.594303	5.27064	0.000236779
MCM10	ENSG00000065328	-0.689869	5.73264	0.000238651
LEF1	ENSG00000138795	0.963181	2.39887	0.000238675
CHIC1	ENSG00000204116	-1.00422	3.90578	0.000239348
AURKB	ENSG00000178999	-0.588257	5.47635	0.000242055
CDKN1A	ENSG00000124762	-0.585403	6.94083	0.000242055
COMMD2	ENSG00000114744	-0.571284	5.11853	0.000242865
TGIF2	ENSG00000118707	0.726964	3.72975	0.000252226
CAPNS1	ENSG00000126247	0.552503	8.41222	0.000253543
ANP32E	ENSG00000143401	0.688601	5.45201	0.000254824
CBY1	ENSG00000100211	-0.701723	5.35982	0.000255744
PAN3-AS1	ENSG00000261485	1.23225	1.30346	0.000255744
GLIS2	ENSG00000126603	1.51167	2.37067	0.000255996
GOT2	ENSG00000125166	-0.406308	8.58591	0.000256936
CCDC28A	ENSG00000024862	0.866568	3.36174	0.000258973
CERS4	ENSG00000090661	0.66221	5.73484	0.000258973
DR1	ENSG00000117505	-0.601177	6.53226	0.000258973
LRRC36	ENSG00000159708	-1.53026	0.534259	0.000258973
NIPA1	ENSG00000170113	-0.547132	5.24864	0.000258973
RDX	ENSG00000137710	0.761119	6.45458	0.000258973
AASDHPPT	ENSG00000149313	-0.561173	5.66007	0.000265132
TTTY15	ENSG00000233864	-0.613825	5.75079	0.000266304
PLK2	ENSG00000145632	-0.588595	5.06044	0.000267643
MFN2	ENSG00000116688	-0.478481	7.74567	0.000269725
INPP5A	ENSG00000068383	0.478729	5.73399	0.00027442
LINC01296	ENSG00000244306	-0.633933	6.39711	0.000275026
PACS1	ENSG00000175115	-0.644195	5.35755	0.000275026
CENPQ	ENSG00000031691	-0.745277	3.93446	0.000275322
MAN1A1	ENSG00000111885	0.957074	3.46725	0.0002764
SERP1	ENSG00000120742	-0.414581	8.12507	0.00027859
AKAP8	ENSG00000105127	0.482197	5.47158	0.000280306
RP11-480I12.5	ENSG00000214796	0.790323	3.41612	0.000284037
PARK2	ENSG00000185345	1.53543	1.2271	0.000284085
SEMA3C	ENSG00000075223	0.905931	5.13798	0.000288304
TRIM45	ENSG00000134253	0.784183	3.48269	0.000289085
SLC25A33	ENSG00000171612	-0.498224	6.76795	0.000290103
MYO1D	ENSG00000176658	0.463417	5.78686	0.00029137
YPEL5	ENSG00000119801	0.567996	4.37892	0.00029137
CAMK1D	ENSG00000183049	1.3148	1.26898	0.000297351
TSHZ3	ENSG00000121297	1.41233	1.60771	0.000298033
SLC45A4	ENSG00000022567	0.782273	4.02619	0.000300253
C5ORF15	ENSG00000113583	0.422896	6.74813	0.000302045
TMEM65	ENSG00000164983	-0.725566	4.85644	0.000309018
ADAM23	ENSG00000114948	1.32075	1.36256	0.000312711
ANKDD1A	ENSG00000166839	1.74123	1.00989	0.000312711
TNFRSF10D	ENSG00000173530	0.449178	6.00724	0.000313082
PNMA1	ENSG00000176903	-0.75535	4.52895	0.000314597
TGM3	ENSG00000125780	0.870836	2.42819	0.000314597
ALG2	ENSG00000119523	-0.444026	5.99087	0.000314605
PABPC4	ENSG00000090621	-0.401416	8.09843	0.000314605
SERPINE2	ENSG00000135919	0.940017	2.36624	0.000315657
GSTO2	ENSG00000065621	-0.908455	2.49094	0.000316039
IL4R	ENSG00000077238	0.961591	2.45084	0.000316039
RP11-134L10.1	ENSG00000272941	0.991815	1.73209	0.000317965
CAMLG	ENSG00000164615	0.636195	5.04618	0.000321118
DNAJB9	ENSG00000128590	-0.598132	4.58307	0.000321595
DIP2B	ENSG00000066084	0.770019	5.60039	0.000324965
FBXO32	ENSG00000156804	0.843084	2.86632	0.000326362
SNN	ENSG00000184602	0.593769	5.53243	0.000328942
PTGFR	ENSG00000122420	-0.692735	4.61094	0.000331573
OSBPL8	ENSG00000091039	-1.0229	5.45606	0.000332387
ZWILCH	ENSG00000174442	-0.546322	6.34258	0.000334418
PTPRJ	ENSG00000149177	-0.668567	4.72321	0.00033506
RP11-135F9.3	ENSG00000280088	1.05171	2.55373	0.000337537
CLEC7A	ENSG00000172243	-0.617891	4.08682	0.000341753
RMDN3	ENSG00000137824	0.486774	5.55347	0.000341999
MOB3A	ENSG00000172081	-0.562627	5.37016	0.0003424
AL589743.1	ENSG00000279508	-1.04693	5.56838	0.000343232
SLFN5	ENSG00000166750	0.67629	5.59685	0.000343232
F2RL1	ENSG00000164251	-0.577642	5.48004	0.000344572
KIF5C	ENSG00000168280	0.675672	5.52256	0.000344572
ZNF614	ENSG00000142556	-0.725215	4.29926	0.000344572
SASH1	ENSG00000111961	-0.759224	5.26071	0.000344608
CCDC69	ENSG00000198624	0.996454	2.45783	0.000347703
AC018463.4	ENSG00000230154	1.20851	1.71543	0.000351766
ZNF542P	ENSG00000240225	-0.621602	5.25967	0.000352455
ZIC2	ENSG00000043355	0.458778	4.79498	0.000353507
SORBS1	ENSG00000095637	0.746379	3.1587	0.000355052
ALX4	ENSG00000052850	1.08845	2.64372	0.000355921
CLIP2	ENSG00000106665	1.60005	1.33327	0.000357861
HMGCR	ENSG00000113161	-0.52216	7.06637	0.000361079
RGS14	ENSG00000169220	0.901098	3.65912	0.00036187
CTA-29F11.1	ENSG00000260708	0.708299	3.78131	0.000365848
GATS	ENSG00000239521	0.773638	3.33113	0.000366397
ITPR3	ENSG00000096433	0.869097	5.36796	0.000367829
RARG	ENSG00000172819	0.922784	3.7065	0.000369166
STAP2	ENSG00000178078	0.722443	6.41053	0.000369166
WASIR1	ENSG00000185203	1.2072	0.999717	0.000375992
NVL	ENSG00000143748	-0.453821	6.40888	0.000378181
NIPA2	ENSG00000140157	-0.392763	6.49548	0.000379224
SUCLG1	ENSG00000163541	0.50336	6.46774	0.000379224
VCX3B	ENSG00000205642	1.35695	1.66868	0.000380106
FAF2	ENSG00000113194	0.510078	7.14492	0.000382579
PAPD7	ENSG00000112941	-0.50651	5.20723	0.000385884
IFT57	ENSG00000114446	-0.573885	6.22427	0.000385987
ACO2	ENSG00000100412	0.417995	7.80904	0.000391183
ESRP2	ENSG00000103067	-0.703884	6.53874	0.000392028
KDM1A	ENSG00000004487	0.39247	6.78939	0.000395743
NXF2	ENSG00000269405	-0.591619	4.25463	0.000395743
NATD1	ENSG00000274180	1.03487	2.20904	0.00039636
PITHD1	ENSG00000057757	-0.465144	5.55186	0.00039737
CDC23	ENSG00000094880	-0.493692	6.09572	0.000398121
UCK1	ENSG00000130717	0.589425	5.4194	0.000400986
LRP1	ENSG00000123384	0.968388	3.84173	0.000402504
FZD4	ENSG00000174804	0.799954	3.27316	0.000402556
DESI1	ENSG00000100418	-0.462273	6.10353	0.00041391
PANK3	ENSG00000120137	0.749485	6.46575	0.00041855
RAVER2	ENSG00000162437	0.725723	4.4607	0.000420864
TTC28	ENSG00000100154	1.09293	2.21787	0.000420864
TRIM36	ENSG00000152503	-0.988685	4.36282	0.000423754
RP11-1023L17.1	ENSG00000215158	0.825281	4.18073	0.000423786
TMEFF2	ENSG00000144339	-0.460857	7.4617	0.000424051
RPS6KA2	ENSG00000071242	-0.660463	5.74501	0.000425849
UBE2J1	ENSG00000198833	-0.562244	6.35017	0.000426852
HSPA12A	ENSG00000165868	0.700806	3.55301	0.000427833
IFNGR2	ENSG00000159128	0.485667	5.43653	0.000428048
FAM184B	ENSG00000047662	0.975621	1.88321	0.000433486
TRIM14	ENSG00000106785	-0.491466	5.84254	0.000437827
RALGPS1	ENSG00000136828	0.785661	3.32264	0.000439406
SSR1	ENSG00000124783	-0.468743	7.90541	0.000441738
MYRIP	ENSG00000170011	0.63541	4.86006	0.000445876
TBX10	ENSG00000167800	-1.71409	0.239161	0.00044628
ITGB4	ENSG00000132470	1.34521	1.30507	0.000448503
PMS2	ENSG00000122512	0.765566	5.59267	0.000459901
CREBZF	ENSG00000137504	0.565745	6.53369	0.000462313
NDUFB4	ENSG00000065518	0.78108	9.56862	0.00046432
SERINC3	ENSG00000132824	0.455981	7.6675	0.000464556
LGALS8	ENSG00000116977	0.608662	7.05961	0.000465318
SFT2D3	ENSG00000173349	0.536798	4.18724	0.000467093
EFCAB11	ENSG00000140025	0.730151	4.20413	0.000468559
IMPDH1	ENSG00000106348	-0.654476	6.58313	0.000473937
CYB5R4	ENSG00000065615	0.802268	3.22639	0.000475136
CRIPAK	ENSG00000179979	0.589988	4.90883	0.000477289
GDPD5	ENSG00000158555	1.52002	0.640765	0.00048234
PRKAR1B	ENSG00000188191	0.751566	4.61434	0.000484384
ATP6V1H	ENSG00000047249	0.461568	6.29982	0.000490197
EEF2K	ENSG00000103319	-0.648784	5.53614	0.000490197
STXBP6	ENSG00000168952	0.846909	2.71605	0.000490197
UBE2D1	ENSG00000072401	-0.691902	4.49428	0.000493048
LINC01341	ENSG00000227953	-0.95761	3.08559	0.000493473
ATAD2	ENSG00000156802	-0.625011	7.32673	0.000495913
CNOT6	ENSG00000113300	0.571166	6.34838	0.000496691
DXO	ENSG00000204348	0.68625	3.88236	0.000499662
SLC44A1	ENSG00000070214	0.507848	6.38175	0.000499662
ALDH9A1	ENSG00000143149	0.392259	7.09209	0.000501996
STAU1	ENSG00000124214	0.401474	7.17975	0.000501996
CHDH	ENSG00000016391	0.491758	6.37572	0.000503467
DLAT	ENSG00000150768	-0.433068	7.15452	0.000504347
PGM3	ENSG00000013375	-0.510694	5.7952	0.000506383
AIF1L	ENSG00000126878	0.481377	6.60481	0.000507119
LINC01024	ENSG00000245146	0.577875	5.35243	0.000508516
PDPR	ENSG00000090857	0.95917	4.66103	0.000514067
REEP1	ENSG00000068615	1.37831	1.40722	0.000519091
TMEM56	ENSG00000152078	0.86485	3.62165	0.000520113
IAH1	ENSG00000134330	0.550025	4.90101	0.0005288
MFAP3	ENSG00000037749	-0.965934	4.16411	0.0005288
PARP3	ENSG00000041880	0.60204	4.30843	0.0005288
SUSD4	ENSG00000143502	1.1149	2.63344	0.0005288
KCNJ3	ENSG00000162989	0.78599	4.39839	0.000528966
TXNIP	ENSG00000265972	0.381912	7.22692	0.000529068
CIRBP-AS1	ENSG00000267493	1.181	2.51031	0.000532572
RP11-465N4.4	ENSG00000234678	0.873089	2.29805	0.00053341
SEMA4F	ENSG00000135622	0.888692	2.32337	0.000533892
SH3BP5	ENSG00000131370	0.760892	4.23913	0.000538523
NAPEPLD	ENSG00000161048	0.852167	4.30156	0.000539975
AC022007.5	ENSG00000206567	1.12161	1.42637	0.000541302
OLFM2	ENSG00000105088	1.47827	0.976009	0.000545885
GYG2	ENSG00000056998	0.61524	3.73744	0.000548477
DUXAP9	ENSG00000225210	-0.829848	5.36475	0.00055365
CCDC92	ENSG00000119242	0.600699	4.34632	0.000554356
DLG3	ENSG00000082458	0.441617	6.60895	0.000554356
GNMT	ENSG00000124713	-1.00077	3.1409	0.000557938
AKTIP	ENSG00000166971	0.476341	6.10134	0.000567511
NOD1	ENSG00000106100	-1.12523	1.30884	0.0005701
UBE2N	ENSG00000177889	-0.569121	7.02966	0.00057225
LRRC31	ENSG00000114248	1.54303	1.22406	0.00058049
ELP2	ENSG00000134759	-0.425829	6.44768	0.000583706
RAB36	ENSG00000100228	0.790839	4.35884	0.000592718
GUCY1A3	ENSG00000164116	-0.66874	6.41934	0.000595046
MICAL2	ENSG00000133816	0.757653	5.25355	0.000599759
ARHGEF2	ENSG00000116584	0.682945	5.12688	0.000607253
COLQ	ENSG00000206561	1.58996	1.6497	0.000607253
BCAR3	ENSG00000137936	-1.04057	2.36161	0.000607946
MPP6	ENSG00000105926	-0.59886	4.88187	0.000607946
TPK1	ENSG00000196511	0.866519	2.20821	0.000607946
UGT2B28	ENSG00000135226	-1.03697	2.40524	0.000607946
YPEL2	ENSG00000175155	0.90732	3.05984	0.000607946
ADGRB2	ENSG00000121753	0.951655	2.56525	0.000612914
RLN1	ENSG00000107018	-0.723669	5.08269	0.000612914
TP53TG3B	ENSG00000261509	1.38218	0.32768	0.000612914
TFAP2C	ENSG00000087510	0.554646	4.62883	0.000617458
ITPR1	ENSG00000150995	1.00482	4.55729	0.000620905
FAR2P1	ENSG00000180178	-1.06395	3.06644	0.000621555
RRM2	ENSG00000171848	-0.440135	7.44712	0.000622186
KCTD1	ENSG00000134504	0.611025	3.67054	0.000622967
KCTD9	ENSG00000104756	-0.635839	4.48243	0.000623084
SIK1	ENSG00000142178	0.779831	2.96199	0.000629292
INPP5J	ENSG00000185133	0.607164	4.22864	0.000629967
FRK	ENSG00000111816	-0.961198	4.37505	0.000632132
SORL1	ENSG00000137642	0.738515	4.458	0.000632132
TMSB4XP4	ENSG00000223551	1.13807	1.88437	0.000638329
COLCA1	ENSG00000196167	0.721342	6.73356	0.000643027
IQSEC1	ENSG00000144711	0.684265	5.30489	0.000643027
PRPF6	ENSG00000101161	0.437432	7.44284	0.000643027
ATF2	ENSG00000115966	0.542183	4.72482	0.000650739
CA5BP1	ENSG00000186312	-0.635269	3.77561	0.000653046
CDC25A	ENSG00000164045	-0.491673	5.53886	0.000653046
SLC35G1	ENSG00000176273	-0.793827	4.19691	0.000653046
ATE1	ENSG00000107669	0.591394	5.08053	0.000654822
CLDND2	ENSG00000160318	1.23425	2.22258	0.000654822
DSP	ENSG00000096696	0.704013	6.99002	0.000656399
S1PR2	ENSG00000267534	0.768322	2.45159	0.000661373
DHRS7	ENSG00000100612	-0.478952	8.38107	0.000661492
SGPL1	ENSG00000166224	-0.518723	6.55672	0.000664776
ZCCHC24	ENSG00000165424	0.503041	4.93554	0.000667038
AC098614.2	ENSG00000213846	-1.02689	1.81108	0.000670546
TRIM4	ENSG00000146833	0.46831	5.45149	0.000670546
NEFL	ENSG00000277586	-0.852032	2.83839	0.00067132
SPECC1	ENSG00000128487	0.374246	5.96358	0.000671419
HIP1	ENSG00000127946	0.775764	5.22487	0.000677382
RPL10L	ENSG00000165496	0.941768	1.76877	0.000677594
TMEM214	ENSG00000119777	-0.430744	6.02568	0.00067785
KCNIP3	ENSG00000115041	1.30454	1.18403	0.000678885
PTPN9	ENSG00000169410	0.445801	5.01158	0.000678885
SQLE	ENSG00000104549	-0.548489	6.39546	0.000685122
TSPY1	ENSG00000258992	1.19204	1.18494	0.000692756
AC018804.3	ENSG00000224087	-2.1961	1.20663	0.000692875
DEPDC1	ENSG00000024526	-0.574389	6.38914	0.00069386
ZNF622	ENSG00000173545	-0.474348	5.87906	0.000695416
RP3-325F22.5	ENSG00000272189	-0.704844	3.38043	0.000699553
CLYBL	ENSG00000125246	0.701545	3.35654	0.000707146
KBTBD8	ENSG00000163376	-0.974417	2.42452	0.000707146
MGAT2	ENSG00000168282	-0.449455	5.57663	0.000709401
CDCA2	ENSG00000184661	-0.557547	5.27479	0.000710776
PDZD2	ENSG00000133401	1.34511	1.75089	0.000716316
RP11-61N20.3	ENSG00000226268	-0.651315	3.81743	0.000723954
NCOA5	ENSG00000124160	0.416574	6.28878	0.000728326
P4HA1	ENSG00000122884	0.461761	5.67507	0.000728326
IL10RB	ENSG00000243646	0.987982	2.987	0.00074813
SPG20	ENSG00000133104	1.62792	0.175315	0.000753738
CRAT	ENSG00000095321	0.566441	5.74291	0.000756885
CTD-3075F15.1	ENSG00000273565	1.3016	0.833027	0.000758494
PARD6G	ENSG00000178184	0.722263	3.126	0.000758635
ZNF629	ENSG00000102870	0.67667	3.90595	0.000762281
KHNYN	ENSG00000100441	0.461078	5.40314	0.000765836
FAM72B	ENSG00000188610	-0.754331	3.98331	0.000767697
MIR22HG	ENSG00000186594	-0.715683	2.8226	0.000769836
CEP55	ENSG00000138180	-0.497514	5.77683	0.000773477
ZHX3	ENSG00000174306	0.52534	5.72665	0.000776114
ATP6V0E1	ENSG00000113732	-0.453043	7.26008	0.000778741
UNC13C	ENSG00000137766	1.51942	0.800421	0.000779529
C1ORF145	ENSG00000162913	1.91724	0.889252	0.000791312
SCNN1G	ENSG00000166828	1.44652	0.984664	0.000791312
VASH2	ENSG00000143494	0.642906	3.96418	0.000798032
SPTLC1	ENSG00000090054	0.644897	5.25031	0.000798208
SPOCK1	ENSG00000152377	-1.71734	0.508364	0.000798275
ERMAP	ENSG00000164010	0.774082	3.65737	0.000801576
PRIM2	ENSG00000146143	-0.571323	4.09883	0.000805852
PCDH11Y	ENSG00000099715	1.3016	2.30976	0.000808705
TM4SF1	ENSG00000169908	-0.829206	3.84623	0.000808705
MICALL1	ENSG00000100139	-0.592671	5.45449	0.000825994
TP73	ENSG00000078900	1.28532	1.91647	0.000845076
MXI1	ENSG00000119950	0.41425	5.69685	0.000857343
PXK	ENSG00000168297	0.56784	3.81981	0.000858916
ADAM22	ENSG00000008277	0.78324	3.76786	0.000862847
MBP	ENSG00000197971	-0.580727	5.68722	0.000868702
C1R	ENSG00000159403	1.08069	1.97585	0.000875866
PCCA	ENSG00000175198	0.42659	4.96949	0.000881742
ECI2	ENSG00000198721	-0.496507	6.96692	0.000883704
HECA	ENSG00000112406	0.695127	3.89571	0.000889101
CARMIL2	ENSG00000159753	1.52103	1.21815	0.000903238
SLC25A19	ENSG00000125454	-0.510286	4.97123	0.000906318
TGFA	ENSG00000163235	0.985918	2.18652	0.000906318
B4GAT1	ENSG00000174684	0.621583	5.08088	0.000907798
RUNDC1	ENSG00000198863	-0.465086	5.53615	0.000909528
BTG2	ENSG00000159388	0.47585	5.14103	0.000911423
NRARP	ENSG00000198435	-0.949386	4.04791	0.000918125
TNFAIP8	ENSG00000145779	-0.628175	4.21089	0.000925062
RASSF5	ENSG00000266094	0.570638	4.07388	0.000931555
RP5-991G20.1	ENSG00000259768	-0.822057	3.60485	0.000933272
ZDHHC20	ENSG00000180776	0.804979	5.52892	0.000933272
PHYH	ENSG00000107537	0.514157	5.88176	0.000934921
PROS1	ENSG00000184500	1.49286	1.30791	0.000935166
GALNT7	ENSG00000109586	-0.76996	5.68183	0.0009391
KLHL24	ENSG00000114796	0.549344	4.23758	0.000944333
ULK1	ENSG00000177169	0.67587	6.08081	0.00094677
FBXW2	ENSG00000119402	-0.538609	6.25484	0.00094889
FBXL7	ENSG00000183580	1.08734	2.00526	0.000949426
FOXD2-AS1	ENSG00000237424	1.44235	0.7391	0.000949426
PIK3C3	ENSG00000078142	0.464913	5.18265	0.000950195
NET1	ENSG00000173848	0.408309	6.48531	0.000951283
C4ORF32	ENSG00000174749	0.748237	4.82462	0.000960663
LAD1	ENSG00000159166	-0.407049	7.43469	0.000965494
ACOT9	ENSG00000123130	-0.49974	4.99924	0.000966697
DTX2	ENSG00000091073	-0.571015	4.26544	0.000971194
RNF34	ENSG00000170633	0.378717	5.99476	0.000975563
LARGE2	ENSG00000165905	0.810821	3.27611	0.0009821
DDX3Y	ENSG00000067048	0.505826	6.26002	0.000982863
PTP4A1	ENSG00000112245	0.459605	7.69366	0.000984477
CHST10	ENSG00000115526	0.493636	4.31236	0.000985241
NRG4	ENSG00000169752	-1.42113	1.00762	0.000988094
FABP6	ENSG00000170231	1.07666	1.31952	0.000990874
ATP8B2	ENSG00000143515	-0.744228	4.02196	0.00100728
IL27RA	ENSG00000104998	1.39444	1.1239	0.00101915
SCAP	ENSG00000114650	-0.588121	6.69958	0.00102012
RP11-816J6.3	ENSG00000269889	1.29033	0.767357	0.00102574
ANG	ENSG00000214274	-0.974677	2.25166	0.00102911
SDAD1P1	ENSG00000228451	0.8896	1.61167	0.00102911
PDCD6	ENSG00000249915	0.426493	6.68366	0.00103339
RP11-73M18.8	ENSG00000269958	-0.854709	2.82658	0.00104457
RP11-429J17.7	ENSG00000254973	1.41019	0.300802	0.00104672
SMIM7	ENSG00000214046	0.450348	5.75242	0.00104672
BEND4	ENSG00000188848	-0.686035	4.22	0.00104865
DEUP1	ENSG00000165325	-1.23785	0.828654	0.00104865
CORO1B	ENSG00000172725	-0.571709	6.61122	0.0010488
TTLL6	ENSG00000170703	0.86833	2.38335	0.00105279
ZFP36L1	ENSG00000185650	0.44628	5.24553	0.00106566
PURA	ENSG00000185129	0.415011	7.56357	0.00107808
LRRC8E	ENSG00000171017	0.587248	4.19431	0.00109127
ALDH5A1	ENSG00000112294	0.598064	4.09659	0.0010972
LUZP1	ENSG00000169641	0.762884	4.11272	0.0010972
TMCC3	ENSG00000057704	-1.31018	1.0295	0.00109932
USP1	ENSG00000162607	0.539525	6.19723	0.00110099
TTC21B	ENSG00000123607	-0.475012	5.07013	0.00111288
EPHB3	ENSG00000182580	0.589847	4.22836	0.00111833
UGCG	ENSG00000148154	-0.476847	4.78109	0.00112053
CADM4	ENSG00000105767	0.891908	3.51977	0.00112083
MED15	ENSG00000099917	0.476794	5.49398	0.00112083
STX19	ENSG00000178750	-0.851175	3.08771	0.00112083
GNG7	ENSG00000176533	0.77973	3.74367	0.00112483
HADHA	ENSG00000084754	0.35346	7.70242	0.00112726
GCFC2	ENSG00000005436	-0.554827	5.27914	0.00114114
GPC5-AS1	ENSG00000235984	-1.23489	2.07577	0.00114276
CENPBD1	ENSG00000177946	0.4404	4.80286	0.00114392
AC093673.5	ENSG00000232533	1.11094	1.78957	0.00114885
BROX	ENSG00000162819	0.551981	6.56401	0.00114885
CAMKK2	ENSG00000110931	-0.408568	6.13682	0.00114885
DNAJC3	ENSG00000102580	-0.458082	6.39291	0.00114885
SLC35E1	ENSG00000127526	0.333496	6.67011	0.0011571
BCL6	ENSG00000113916	-0.583765	5.21009	0.00116589
NUP35	ENSG00000163002	-0.645833	3.95577	0.00116791
SH3GLB1	ENSG00000097033	0.472522	4.74484	0.00116999
GPATCH11	ENSG00000152133	-0.627555	3.72559	0.00117673
EFNA3	ENSG00000143590	0.76196	3.73405	0.00118333
GPATCH4	ENSG00000160818	-0.389547	6.54988	0.00119009
ST7-AS1	ENSG00000227199	0.932529	2.14346	0.00119027
HADH	ENSG00000138796	0.393295	6.37064	0.00119424
PERP	ENSG00000112378	-0.381275	7.58467	0.00119424
PNMA6A	ENSG00000235961	1.2037	2.78897	0.00119538
CYTH2	ENSG00000105443	0.511695	5.27982	0.0012021
NIPAL1	ENSG00000163293	0.611654	4.03128	0.00121807
UNC5B	ENSG00000107731	1.15941	1.64287	0.00122256
TRIM5	ENSG00000132256	-0.482157	5.25821	0.00122601
NAALADL2	ENSG00000177694	-0.715124	5.93361	0.00122634
UNC13B	ENSG00000198722	-0.537517	6.32271	0.00122663
FAM216A	ENSG00000204856	0.432602	5.58783	0.00123556
KNSTRN	ENSG00000128944	-0.534152	5.52246	0.00123616
PNMA3	ENSG00000183837	0.793566	2.48187	0.00124271
ADRB2	ENSG00000169252	-0.555877	4.53953	0.00126225
BTD	ENSG00000169814	0.45319	4.74166	0.00126465
ATAT1	ENSG00000137343	0.737024	3.33652	0.00126568
SERF1A	ENSG00000172058	-0.542441	5.58703	0.00126568
CDV3	ENSG00000091527	-0.397178	7.73191	0.00126595
EIF4E2	ENSG00000135930	0.399555	6.33402	0.00126595
TMEM106C	ENSG00000134291	0.48852	7.33969	0.00126595
LMLN	ENSG00000185621	-0.644756	4.85211	0.00127111
GLRX2	ENSG00000023572	-0.494956	4.27902	0.0012712
S100A13	ENSG00000189171	0.727137	3.31085	0.0012712
RP11-9E17.1	ENSG00000277534	0.684188	3.3046	0.00127318
PYGL	ENSG00000100504	1.04078	2.05709	0.00127492
RP11-1198D22.1	ENSG00000235558	0.905057	1.98082	0.00127492
TMSB4X	ENSG00000205542	0.76717	7.09586	0.00127492
PDE9A	ENSG00000160191	-0.498496	5.10009	0.00128634
USP15	ENSG00000135655	0.645662	5.95138	0.00128731
KCTD20	ENSG00000112078	-0.493491	6.49262	0.0012889
ELK4	ENSG00000158711	-0.734708	6.52485	0.00129048
RFX3	ENSG00000080298	0.840868	3.4424	0.00129898
GPR37	ENSG00000170775	-0.956135	1.72771	0.00130264
KLHL20	ENSG00000076321	-0.642621	5.03106	0.00130264
PRKD1	ENSG00000184304	0.4209	7.70908	0.00130553
INTS12	ENSG00000138785	-0.746144	4.77293	0.00130978
LYSMD3	ENSG00000176018	-0.821799	4.84375	0.00132148
EPHX1	ENSG00000143819	0.382511	8.69781	0.00134402
KIAA2022	ENSG00000050030	1.76384	0.770807	0.00134402
TMEM181	ENSG00000146433	0.657044	5.62676	0.00134446
CDCA4	ENSG00000170779	-0.615212	5.0757	0.00134517
SLC39A10	ENSG00000196950	-0.768814	5.06458	0.00134517
RP11-267M23.1	ENSG00000280123	-1.16551	2.55081	0.00134601
FICD	ENSG00000198855	-0.529603	4.10268	0.00135683
KCNS3	ENSG00000170745	0.676183	3.34546	0.00136574
NUDT4	ENSG00000173598	0.404476	7.38407	0.00136574
PPFIBP1	ENSG00000110841	-0.539791	5.45011	0.00136579
AMACR	ENSG00000242110	0.844632	2.43059	0.0013727
ERCC6L	ENSG00000186871	-0.70518	4.5544	0.00137316
TSPY4	ENSG00000233803	1.15651	0.854169	0.00137921
PER1	ENSG00000179094	-0.970785	3.62428	0.00138399
UBE2E2	ENSG00000182247	0.394551	5.33443	0.00138399
LAMTOR3	ENSG00000109270	0.482892	4.91877	0.00138789
GNPNAT1	ENSG00000100522	-0.407969	6.82202	0.00138928
YPEL3	ENSG00000090238	0.843136	3.22955	0.00138928
VCY	ENSG00000129864	1.03849	2.30562	0.00139033
TMEM165	ENSG00000134851	-0.371178	6.51639	0.00139346
LINC01133	ENSG00000224259	0.626391	4.1453	0.00139585
FAM72A	ENSG00000196550	-0.592177	4.02853	0.0014017
MPP2	ENSG00000108852	0.542226	6.208	0.00141414
SERF1B	ENSG00000205572	-0.514572	5.54339	0.00141414
LAMA3	ENSG00000053747	-0.695258	7.09864	0.00141556
TTC5	ENSG00000136319	-0.482659	4.55276	0.00141998
HDAC2	ENSG00000196591	-0.431049	7.96558	0.00142583
OVGP1	ENSG00000085465	-0.629924	2.97949	0.00143801
GUSBP3	ENSG00000253203	0.845886	3.05319	0.00144303
COX15	ENSG00000014919	-0.398829	5.42927	0.00144364
BEX4	ENSG00000102409	0.549822	3.83135	0.00146786
DEPDC1B	ENSG00000035499	-0.481945	5.16153	0.00147909
IPMK	ENSG00000151151	-0.752562	3.09723	0.00148133
LRRC6	ENSG00000129295	1.10957	1.16373	0.00148505
TRIM32	ENSG00000119401	0.515727	4.49998	0.00149134
FBN1	ENSG00000166147	-1.88447	0.859549	0.00149509
ENDOV	ENSG00000173818	0.626053	3.54383	0.0015079
BTN3A1	ENSG00000026950	-0.984705	2.60382	0.00151014
CD83	ENSG00000112149	1.0802	2.17594	0.00151014
SRF	ENSG00000112658	-0.663963	5.13404	0.00151259
ABTB2	ENSG00000166016	0.649233	3.97508	0.00151425
CORO1A	ENSG00000102879	1.4648	1.25405	0.00151936
CRLF3	ENSG00000176390	-0.67743	3.36868	0.00151936
IRF6	ENSG00000117595	0.352226	6.207	0.00151936
TMEM170B	ENSG00000205269	0.886959	2.60735	0.00151936
MMP11	ENSG00000099953	0.896769	2.95726	0.00154177
EFNB3	ENSG00000108947	1.33117	1.39267	0.00154923
MYT1	ENSG00000196132	0.650626	3.39833	0.0015513
ERGIC2	ENSG00000087502	-0.441429	6.1405	0.00155182
CANT1	ENSG00000171302	-0.445728	7.23817	0.00155264
TWISTNB	ENSG00000105849	-0.575648	5.36285	0.00155984
GRAMD4	ENSG00000075240	0.803262	3.70215	0.00156268
MAPT	ENSG00000186868	0.659465	3.92307	0.00156268
CHD7	ENSG00000171316	-0.791195	3.47111	0.00156772
HERPUD1	ENSG00000051108	-0.387582	6.89487	0.00156772
PGM1	ENSG00000079739	0.452263	5.35643	0.00156772
SLC15A2	ENSG00000163406	-1.58537	0.743168	0.00156772
SMAP1	ENSG00000112305	0.516511	4.624	0.00156772
SSBP3	ENSG00000157216	0.361022	6.56382	0.00156772
DSCR3	ENSG00000157538	0.405048	5.51313	0.00158077
ATP8B5P	ENSG00000179766	0.81309	1.71317	0.00158745
MTMR2	ENSG00000087053	-0.55045	5.80891	0.00161109
FNBP1	ENSG00000187239	0.442947	5.29115	0.00161714
FZD7	ENSG00000155760	0.902579	2.07299	0.00163412
MT-TT	ENSG00000210195	1.32554	3.24704	0.00164432
NCKAP1	ENSG00000061676	-0.637257	6.81495	0.00164432
GLB1	ENSG00000170266	0.400379	5.43363	0.00164874
RP11-98J23.2	ENSG00000198237	0.903046	2.23199	0.00165755
AC009404.2	ENSG00000236255	0.931334	2.08138	0.00166074
HIST1H4H	ENSG00000158406	0.501849	4.72713	0.00166701
KRCC1	ENSG00000172086	0.564723	4.02457	0.00166701
HK2	ENSG00000159399	-0.5178	5.62298	0.00166962
RP11-589F5.4	ENSG00000253366	0.926593	2.10992	0.00167025
PGM2L1	ENSG00000165434	0.92678	2.31452	0.00170337
FLJ31104	ENSG00000227908	0.719271	2.20157	0.00171041
RP11-1415C14.4	ENSG00000254701	0.978009	2.18317	0.00171951
DCAF16	ENSG00000163257	-0.492235	6.34733	0.00172337
AFMID	ENSG00000183077	0.467536	5.38909	0.00172417
KLF5	ENSG00000102554	-0.930516	2.38472	0.00172533
FAM199X	ENSG00000123575	-0.467432	6.10793	0.00172552
S100A11	ENSG00000163191	-0.489081	7.18265	0.00172552
ARRDC4	ENSG00000140450	0.631934	4.65552	0.00173869
BMP1	ENSG00000168487	0.706653	3.68443	0.00174573
DTNB	ENSG00000138101	0.423846	5.79524	0.00174703
STXBP1	ENSG00000136854	0.5131	5.66767	0.00175501
BAMBI	ENSG00000095739	0.398099	5.87925	0.00175627
MRPL44	ENSG00000135900	-0.438733	5.52106	0.00176073
CMAS	ENSG00000111726	-0.416845	6.4895	0.00178065
SDC4	ENSG00000124145	0.539072	6.27104	0.00178065
LRRC59	ENSG00000108829	-0.350638	7.70964	0.00178344
ARHGEF4	ENSG00000136002	0.833901	3.04097	0.00178558
AKT1S1	ENSG00000204673	0.531033	7.07294	0.00179744
SOX4	ENSG00000124766	0.450905	6.68521	0.00180214
FKBP14	ENSG00000106080	-0.83808	3.51106	0.00183001
KCNQ5	ENSG00000185760	0.769953	2.18001	0.00185973
CCDC7	ENSG00000216937	-0.809859	1.76441	0.00188257
SLC7A5	ENSG00000103257	0.632648	3.66926	0.00189396
RP11-617F23.1	ENSG00000259291	0.78885	2.56206	0.00189606
WDR45	ENSG00000196998	0.49758	5.56016	0.00189635
C2CD2	ENSG00000157617	0.46186	5.21603	0.00189885
ODC1	ENSG00000115758	-0.39291	9.37084	0.00191489
RTCA	ENSG00000137996	-0.374136	6.59559	0.00191774
VWA8	ENSG00000102763	-0.569452	4.99964	0.00191774
PHC1	ENSG00000111752	0.679013	4.41757	0.00191921
COL4A6	ENSG00000197565	-1.51212	0.539285	0.00192089
CD276	ENSG00000103855	0.445045	7.22374	0.00193341
PRSS16	ENSG00000112812	0.650702	3.4061	0.00193986
CD82	ENSG00000085117	0.988806	2.42473	0.00194022
PPP4R4	ENSG00000119698	1.37251	0.641989	0.00194919
DNASE2	ENSG00000105612	0.514698	5.95296	0.00195933
C14ORF132	ENSG00000227051	0.713834	3.85703	0.00195946
GPR75	ENSG00000119737	-1.75434	0.934499	0.00195946
HIVEP3	ENSG00000127124	0.920863	2.47207	0.00195946
MINA	ENSG00000170854	-0.392706	6.10716	0.00195946
RP11-351I21.11	ENSG00000270074	0.906316	1.65565	0.00195946
PTPN3	ENSG00000070159	0.446751	5.58942	0.00196728
GTF2H2	ENSG00000145736	0.341859	7.52615	0.00197432
ATG4C	ENSG00000125703	-0.47883	3.85297	0.00199094
FRMD8	ENSG00000126391	-0.692895	5.13955	0.00199094
SH3BP4	ENSG00000130147	0.452417	5.99638	0.00199094
HMGN4	ENSG00000182952	-0.496864	4.08773	0.001993
LSS	ENSG00000160285	-0.588248	6.92595	0.00199301
NRG3	ENSG00000185737	1.21864	1.19923	0.00199301
EIF4E	ENSG00000151247	-0.40093	6.63503	0.00199669
OSBP2	ENSG00000184792	0.568463	4.42595	0.00199848
ZSWIM6	ENSG00000130449	0.680531	3.53026	0.00199848
EIF2S3	ENSG00000130741	0.385881	8.43017	0.00199883
SYNM	ENSG00000182253	0.518868	3.56424	0.00199909
RP5-862P8.2	ENSG00000143674	0.772183	2.74826	0.00200274
YPEL1	ENSG00000100027	0.744625	2.60495	0.00202334
AGPAT5	ENSG00000155189	-0.365209	5.58815	0.00202727
CLDN8	ENSG00000156284	-0.642332	3.11159	0.0020285
GBP2	ENSG00000162645	1.41658	1.19666	0.00203657
PDE4A	ENSG00000065989	1.30102	0.515662	0.00204181
PPP2CB	ENSG00000104695	-0.472803	6.15799	0.00207897
DNAJC3-AS1	ENSG00000247400	-0.553233	3.76607	0.0020792
SALL2	ENSG00000165821	1.24179	1.41488	0.0020792
ZNF330	ENSG00000109445	-0.515619	4.65854	0.0020792
CDC27	ENSG00000004897	-0.512623	6.17809	0.00208713
NKIRAS1	ENSG00000197885	-0.685906	3.9917	0.00209814
ARNT	ENSG00000143437	-0.571774	5.52647	0.00210684
POT1	ENSG00000128513	-0.770539	5.47072	0.00211915
RAD18	ENSG00000070950	-0.518004	5.15027	0.00211915
STX17	ENSG00000136874	-0.529306	4.83513	0.00211915
CCNJ	ENSG00000107443	-0.73612	2.68178	0.00214807
RP11-1415C14.3	ENSG00000253816	0.821387	2.24282	0.00215636
CRNDE	ENSG00000245694	0.52418	4.81338	0.00217166
RP11-147L13.15	ENSG00000274712	0.597219	2.7978	0.00217166
RP11-158H5.7	ENSG00000268573	-0.781259	2.6092	0.00217166
UBN2	ENSG00000157741	-0.85902	5.08309	0.00217178
RARRES3	ENSG00000133321	1.07826	1.14319	0.00217876
COG1	ENSG00000166685	0.384206	5.37469	0.00218869
MIR222HG	ENSG00000270069	1.57859	0.311966	0.00219775
HIST2H2BE	ENSG00000184678	0.364592	7.00374	0.00219962
PHLDB1	ENSG00000019144	0.56109	4.62518	0.00219962
PRR11	ENSG00000068489	-0.527653	5.40513	0.00221716
ZWINT	ENSG00000122952	-0.360413	6.86823	0.00221721
RP11-206M11.7	ENSG00000244468	-1.73188	0.415694	0.00222685
FCF1	ENSG00000119616	-0.414024	5.33929	0.00222722
ASPH	ENSG00000198363	-0.398365	7.24734	0.00224208
ARHGAP27	ENSG00000159314	0.608247	3.83361	0.00224967
DDHD2	ENSG00000085788	-0.529999	5.31133	0.00224967
FTSJ1	ENSG00000068438	0.437342	5.68346	0.00224967
KHDC1	ENSG00000135314	0.800926	3.08691	0.00224967
PCNX4	ENSG00000126773	-0.54791	6.00955	0.00224967
LRRC7	ENSG00000033122	0.738776	2.91554	0.00225793
PDLIM5	ENSG00000163110	-0.466022	5.93221	0.00225793
KDM5A	ENSG00000073614	0.539351	4.9913	0.0022911
AGPS	ENSG00000018510	-0.536983	4.60777	0.00230909
NPAS2	ENSG00000170485	0.842049	2.47755	0.00231139
SHC2	ENSG00000129946	1.56936	0.998918	0.00231709
CMIP	ENSG00000153815	0.46025	5.96937	0.00231752
NXN	ENSG00000167693	0.621099	4.04324	0.00232865
CRY2	ENSG00000121671	-0.54681	3.92908	0.00234348
CNDP2	ENSG00000133313	-0.36971	9.11584	0.00236366
WNT3	ENSG00000108379	1.38872	1.35023	0.00237184
DHTKD1	ENSG00000181192	0.505065	5.08408	0.00238742
SOAT1	ENSG00000057252	-0.514958	5.22021	0.00239639
RNF144A	ENSG00000151692	0.531139	3.79473	0.00240484
PDGFA	ENSG00000197461	1.15864	1.09092	0.00241333
GPC3	ENSG00000147257	0.826957	2.34649	0.00241449
PKP4	ENSG00000144283	0.370067	6.588	0.00242565
TMEM209	ENSG00000146842	0.579429	5.12437	0.00242565
PRKAG2-AS1	ENSG00000239911	1.07806	1.44574	0.00242845
BX255923.2	ENSG00000204790	-0.79236	2.03186	0.00244155
OVOL1	ENSG00000172818	0.721188	2.45653	0.00244155
MDC1	ENSG00000137337	-0.570829	6.66568	0.00244917
CYTH1	ENSG00000108669	-0.451668	5.44315	0.00246418
COL3A1	ENSG00000168542	1.73763	0.256164	0.00247851
TRNP1	ENSG00000253368	0.621118	3.06695	0.00247946
ATP11C	ENSG00000101974	0.814503	4.09084	0.00249282
GTF2H2B	ENSG00000226259	0.366205	6.84929	0.00249739
AOC3	ENSG00000131471	-0.708424	2.53827	0.00250163
SPATS2L	ENSG00000196141	-0.430961	4.89538	0.0025044
ANKRD46	ENSG00000186106	0.606981	3.85692	0.00250685
MYRF	ENSG00000124920	1.41814	0.812522	0.00252285
WASF1	ENSG00000112290	0.613746	3.61471	0.00252285
LBR	ENSG00000143815	-0.421995	6.59686	0.0025611
DCAF11	ENSG00000100897	0.326165	6.60814	0.0025613
GPCPD1	ENSG00000125772	-0.500105	4.63247	0.00257074
TSPAN5	ENSG00000168785	0.637075	2.52141	0.00257074
GSTA1	ENSG00000243955	0.640333	5.7821	0.00257906
PRRG4	ENSG00000135378	-0.5834	5.17061	0.00257906
CHEK1	ENSG00000149554	-0.520049	5.6574	0.0025835
ADAM9	ENSG00000168615	-0.496103	7.63774	0.00259989
CCDC87	ENSG00000182791	1.40396	0.918058	0.00261488
APLP1	ENSG00000105290	0.558567	5.87206	0.00261884
AKIRIN2	ENSG00000135334	-0.530304	3.78283	0.00262604
RRN3P3	ENSG00000257122	-0.871802	1.87966	0.00262604
ABCC8	ENSG00000006071	1.24935	1.26648	0.00263872
HEXA	ENSG00000213614	0.368817	4.94278	0.00265887
TP53TG3	ENSG00000183632	1.17791	0.680293	0.00266423
JADE2	ENSG00000043143	-0.558056	4.71906	0.00267291
MAGI2	ENSG00000187391	0.841696	2.19419	0.00267596
FASTKD1	ENSG00000138399	-0.534878	4.52289	0.00268063
ACTR3	ENSG00000115091	-0.361393	7.46323	0.00268216
STON1	ENSG00000243244	1.48118	0.70751	0.00268619
TMPRSS11E	ENSG00000087128	-0.962269	1.40792	0.00268737
SLCO5A1	ENSG00000137571	0.636513	3.9378	0.00270134
TSPY8	ENSG00000229549	1.57525	0.465975	0.0027175
CALCOCO1	ENSG00000012822	0.546865	4.01657	0.00272494
TP53TG3F	ENSG00000278848	1.21837	0.389425	0.00273475
KRT19	ENSG00000171345	-1.33553	1.57604	0.00274389
ERCC2	ENSG00000104884	-0.548309	4.82366	0.00275284
ASB8	ENSG00000177981	0.446666	4.69869	0.00275679
ACYP2	ENSG00000170634	0.48142	3.88332	0.00277578
GABBR1	ENSG00000204681	1.12627	2.72367	0.00277578
MOCS3	ENSG00000124217	-0.406865	4.44422	0.00277578
P2RX7	ENSG00000089041	1.30221	1.38834	0.00277578
RP11-136K7.2	ENSG00000250387	0.472211	5.56703	0.00277883
SIM2	ENSG00000159263	0.546888	4.37279	0.00278361
YWHAZP5	ENSG00000213260	-0.518988	3.48597	0.00279768
RGS11	ENSG00000076344	0.845082	2.33016	0.0028068
ADD2	ENSG00000075340	1.28469	0.147626	0.0028122
CALU	ENSG00000128595	-0.403972	7.05063	0.00282657
RHNO1	ENSG00000171792	-0.481142	5.76775	0.00282657
SNHG3	ENSG00000242125	0.513531	7.8927	0.00282657
TESMIN	ENSG00000132749	0.538844	4.76373	0.00282657
ABI1	ENSG00000136754	-0.417137	5.11626	0.0028316
SQRDL	ENSG00000137767	0.683812	4.4717	0.0028316
RAB22A	ENSG00000124209	-0.403152	5.60097	0.00283364
CASC3	ENSG00000108349	0.378772	6.90762	0.00284002
METTL8	ENSG00000123600	-0.469712	4.89844	0.00284002
PITPNC1	ENSG00000154217	0.648353	2.5154	0.00284002
FAM81A	ENSG00000157470	0.530693	3.83793	0.00284386
LINC01411	ENSG00000249306	0.961895	0.7048	0.00284386
UTP15	ENSG00000164338	-0.428222	5.58124	0.00284386
FOSL2	ENSG00000075426	0.691541	4.19027	0.00284639
SKP2	ENSG00000145604	-0.452504	5.44511	0.00285185
EPHA1	ENSG00000146904	0.660331	3.84509	0.00285346
TMEM33	ENSG00000109133	-0.439932	7.56974	0.00285346
ARHGEF37	ENSG00000183111	0.375413	4.95367	0.00288888
C6ORF106	ENSG00000196821	-0.438683	6.26713	0.00289956
PTPN6	ENSG00000111679	0.430122	5.27033	0.0029322
PIK3IP1	ENSG00000100100	0.550386	4.11639	0.00294173
MPRIP	ENSG00000133030	0.380573	7.31727	0.00294477
RACGAP1	ENSG00000161800	-0.325997	6.67009	0.00294572
NEDD4L	ENSG00000049759	-0.421962	7.19121	0.00295573
DSEL	ENSG00000171451	-0.458526	6.40918	0.0029602
CTD-2561J22.5	ENSG00000268119	0.957119	1.0092	0.00297745
LNPK	ENSG00000144320	-0.454131	5.0159	0.00298392
ZNF322	ENSG00000181315	-0.734643	4.29582	0.00299292
TMCC2	ENSG00000133069	0.883954	1.84692	0.00300712
ELFN2	ENSG00000166897	1.34096	1.62992	0.00301144
NWD1	ENSG00000188039	1.12763	1.41478	0.00302428
SLC25A6	ENSG00000169100	0.442933	9.17573	0.00302428
ZNF485	ENSG00000198298	-0.615258	3.44661	0.00303764
SCPEP1	ENSG00000121064	0.420006	5.87165	0.00304334
CDKL5	ENSG00000008086	-1.14672	2.43393	0.0030441
CARS2	ENSG00000134905	0.426679	5.71417	0.00304818
WNT5A	ENSG00000114251	1.04906	1.86951	0.00305261
SLC2A12	ENSG00000146411	-0.601983	4.55512	0.00308978
MME	ENSG00000196549	0.477089	8.88383	0.00309109
SLC30A4	ENSG00000104154	0.428344	7.93215	0.00309109
NPTN	ENSG00000156642	0.476324	5.72689	0.00309317
PAK1	ENSG00000149269	0.445633	4.80655	0.00310182
DNM1L	ENSG00000087470	-0.488267	6.53913	0.00310729
RPGRIP1L	ENSG00000103494	0.659848	4.76296	0.003109
TSTD2	ENSG00000136925	0.482771	4.73182	0.00311798
CNOT3	ENSG00000088038	0.470379	5.71968	0.00312166
IP6K2	ENSG00000068745	0.371589	6.92128	0.00312166
GTPBP3	ENSG00000130299	-0.743573	5.27364	0.00314852
KANK2	ENSG00000197256	0.37458	6.17392	0.00315242
MYLK-AS1	ENSG00000239523	0.874379	2.36149	0.00315242
RP11-44F14.10	ENSG00000280027	1.09902	2.1484	0.00315242
PKNOX2	ENSG00000165495	0.758635	3.47353	0.00318471
CPE	ENSG00000109472	0.31378	6.31143	0.0031913
LUZP2	ENSG00000187398	0.43567	6.23577	0.00319421
EPAS1	ENSG00000116016	1.53728	0.725147	0.0032008
HERPUD2	ENSG00000122557	0.7032	3.87265	0.00322918
RAB6B	ENSG00000154917	0.503991	4.53057	0.00324575
NLGN2	ENSG00000169992	0.729129	3.32508	0.00325014
LINC01420	ENSG00000204272	0.555618	5.08827	0.00327663
PDP1	ENSG00000164951	0.525253	3.95606	0.00328361
C16ORF70	ENSG00000125149	-0.343788	6.05738	0.00328508
CDC42EP3	ENSG00000163171	-0.539807	4.31463	0.00332839
SH3PXD2A	ENSG00000107957	1.27588	1.03697	0.0033326
TRIM62	ENSG00000116525	0.617635	3.65513	0.00335569
ALG9	ENSG00000086848	0.655072	3.48887	0.00337177
GLG1	ENSG00000090863	0.397704	7.26577	0.0033774
NR3C2	ENSG00000151623	-0.902323	2.71969	0.0033774
KIAA0513	ENSG00000135709	0.531187	4.9669	0.00339172
EPB41L4B	ENSG00000095203	-0.464382	6.53631	0.00339202
RP11-467L19.16	ENSG00000278626	-0.848113	2.3958	0.0033968
SLC25A32	ENSG00000164933	-0.402626	5.10302	0.0033968
ACAD10	ENSG00000111271	0.424459	4.85136	0.00345415
SPDEF	ENSG00000124664	-1.05628	5.53078	0.00345415
LCP1	ENSG00000136167	-0.386147	7.57974	0.00345744
LPIN2	ENSG00000101577	0.424081	5.81692	0.00347241
RP11-109M17.2	ENSG00000270372	1.36139	1.30166	0.00347279
TERF2	ENSG00000132604	0.396863	5.64613	0.00347279
CCNC	ENSG00000112237	-0.495487	6.27756	0.00347484
SPRY1	ENSG00000164056	-0.968566	2.39057	0.00347484
GRAMD1A	ENSG00000089351	0.464725	5.8871	0.00350286
USP18	ENSG00000184979	-0.419051	4.72901	0.00350286
ARL15	ENSG00000185305	0.773438	3.03347	0.00350296
COL6A1	ENSG00000142156	0.476611	6.79681	0.00350296
NOL6	ENSG00000165271	-0.395372	6.92167	0.00353342
ANGEL2	ENSG00000174606	-0.432022	4.84156	0.00355091
BRIX1	ENSG00000113460	-0.418602	6.34306	0.00355091
IRF5	ENSG00000128604	-0.707859	2.91036	0.0035668
RAB7A	ENSG00000075785	0.304644	8.39081	0.00364671
JKAMP	ENSG00000050130	-0.463184	6.07095	0.00365373
ZSCAN32	ENSG00000140987	0.466028	3.92165	0.00365915
SBDSP1	ENSG00000225648	-0.52173	4.01642	0.00368364
ADGRD1	ENSG00000111452	0.833114	2.74434	0.00370502
GOSR1	ENSG00000108587	-0.355982	5.93948	0.00370502
KLHL42	ENSG00000087448	0.476264	6.16149	0.00370502
RARB	ENSG00000077092	-1.03498	1.52696	0.00370502
SFXN2	ENSG00000156398	-0.373981	6.062	0.00370502
ADCY9	ENSG00000162104	0.656242	4.98446	0.00373581
RP11-87C12.5	ENSG00000255856	1.03173	1.68946	0.00373974
NSUN3	ENSG00000178694	0.593847	3.98722	0.00374951
PRRC2B	ENSG00000130723	0.565769	8.10207	0.00374951
CCP110	ENSG00000103540	-0.70792	4.68636	0.00375012
RGS12	ENSG00000159788	0.676651	4.37375	0.00375012
TJP1	ENSG00000104067	-0.637564	7.48088	0.00375012
SLC9A7	ENSG00000065923	0.467925	6.31563	0.00375125
RBM12	ENSG00000244462	-0.41962	7.16527	0.00375697
C19ORF57	ENSG00000132016	0.804001	2.56674	0.00376158
TBXAS1	ENSG00000059377	-0.552403	3.05159	0.00376538
SPAG5-AS1	ENSG00000227543	1.05049	0.493577	0.00377291
HILPDA	ENSG00000135245	-0.464711	4.42048	0.00380432
ACSM1	ENSG00000166743	-1.28198	0.378965	0.0038077
DLGAP5	ENSG00000126787	-0.410613	6.26869	0.0038077
NEDD9	ENSG00000111859	0.538798	3.5389	0.0038077
TRIM13	ENSG00000204977	-0.42628	4.20936	0.00381878
ALYREF	ENSG00000183684	0.607999	7.26754	0.00382148
CUL2	ENSG00000108094	-0.416474	6.0699	0.00382148
MARVELD2	ENSG00000152939	0.36618	7.04848	0.00382148
RP11-195E2.1	ENSG00000230847	1.00003	2.67325	0.00382148
MYBL2	ENSG00000101057	-0.395902	7.17552	0.00382242
RP5-1065J22.8	ENSG00000273382	0.584048	3.44619	0.00382242
RP11-20I23.13	ENSG00000261613	0.725881	2.03721	0.00382467
U2SURP	ENSG00000163714	-0.512323	6.82212	0.00382467
MFSD14A	ENSG00000156875	0.505977	6.03623	0.0038285
FOXP3	ENSG00000049768	0.948697	0.930723	0.00384708
TSPAN31	ENSG00000135452	0.71224	3.643	0.00384829
GPR161	ENSG00000143147	0.599024	3.60659	0.00387159
WASIR2	ENSG00000231439	1.09642	1.59142	0.00388081
TMEM167A	ENSG00000174695	-0.340951	6.89192	0.00388856
SLC25A21	ENSG00000183032	0.685596	2.2705	0.00389318
ERBIN	ENSG00000112851	0.559915	6.58847	0.00389415
PCED1B	ENSG00000179715	0.911304	1.55758	0.00390067
DDIAS	ENSG00000165490	-0.766115	4.91431	0.00392192
SF3B3	ENSG00000189091	0.356092	8.17032	0.00392429
TCFL5	ENSG00000101190	0.386966	4.42098	0.00392429
SARAF	ENSG00000133872	-0.308258	8.61577	0.00393118
MIR762HG	ENSG00000260083	0.600004	3.80339	0.00394941
SNRK	ENSG00000163788	0.450945	4.86241	0.00395461
TMEM158	ENSG00000249992	1.06065	1.4988	0.00399181
COQ2	ENSG00000173085	0.365945	5.05609	0.00399277
MEX3A	ENSG00000254726	0.636852	3.45078	0.00399445
RP1-198K11.5	ENSG00000275457	1.06811	1.84992	0.00399951
BAHCC1	ENSG00000266074	0.65747	4.16697	0.00402982
RP11-504P24.3	ENSG00000185495	-0.934821	2.51504	0.00404291
FER1L4	ENSG00000088340	1.11349	1.39329	0.00406628
HCG18	ENSG00000231074	-0.432076	4.77159	0.00406628
BMP8B	ENSG00000116985	1.27992	0.972746	0.0040729
GTF2IP12	ENSG00000283050	-0.986644	2.78412	0.0040729
HNRNPUL1	ENSG00000105323	0.379821	7.09691	0.0040729
MIB1	ENSG00000101752	0.572351	4.90419	0.0040729
RP11-488L18.10	ENSG00000259865	-0.909617	2.14025	0.0040729
VEGFB	ENSG00000173511	1.12638	1.39579	0.0040729
PEG3	ENSG00000198300	-0.583034	9.22485	0.00407836
MCUB	ENSG00000005059	1.16693	0.391161	0.00409005
NTNG1	ENSG00000162631	-0.98058	0.885165	0.00413731
TDG	ENSG00000139372	-0.376281	6.60658	0.00413731
GTF2H2C	ENSG00000183474	0.371589	7.09694	0.00416488
NMRK1	ENSG00000106733	0.556931	3.58524	0.00416488
RP11-414C23.1	ENSG00000278847	1.20872	-0.126844	0.00416488
TRAF3IP2	ENSG00000056972	0.398424	4.60624	0.00416488
ETFDH	ENSG00000171503	0.369007	6.22035	0.00417497
ARHGEF17	ENSG00000110237	0.446824	4.97223	0.00423035
KPNA2	ENSG00000182481	-0.377808	8.3552	0.0042306
HES6	ENSG00000144485	-0.977382	6.09749	0.00424467
CMC1	ENSG00000187118	-0.465577	4.82385	0.00424702
AC159540.1	ENSG00000230606	1.12676	2.66304	0.00425939
CD99L2	ENSG00000102181	0.497477	4.68363	0.00428087
SCARB1	ENSG00000073060	-0.433274	7.00253	0.00428087
FAM72D	ENSG00000215784	-0.567574	3.83985	0.00432441
RP13-131K19.6	ENSG00000272434	1.30841	0.603537	0.00432448
ARRB2	ENSG00000141480	-0.343048	5.69808	0.00433095
PAWR	ENSG00000177425	0.414204	5.71494	0.0043506
BHLHA15	ENSG00000180535	-1.35427	1.81641	0.00438372
SLC6A16	ENSG00000063127	1.31135	1.42332	0.00438549
TMEM109	ENSG00000110108	-0.43499	7.06835	0.00439226
ACADVL	ENSG00000072778	0.398023	8.63077	0.00441667
BID	ENSG00000015475	0.472158	4.87055	0.00444167
C16ORF71	ENSG00000166246	0.933623	1.70477	0.00444167
CXXC5	ENSG00000171604	0.412361	5.45671	0.00444167
LARP6	ENSG00000166173	0.654908	4.59842	0.00444167
PIGF	ENSG00000151665	0.448809	4.09513	0.00444167
C18ORF8	ENSG00000141452	0.336858	5.18744	0.00445166
DHCR7	ENSG00000172893	-0.424746	7.44476	0.00445166
MTOR	ENSG00000198793	-0.471402	6.61333	0.00445805
RP11-532F12.5	ENSG00000261183	0.603947	4.51001	0.00446559
KIF16B	ENSG00000089177	0.631271	3.45726	0.00448689
OTULIN	ENSG00000154124	-0.401776	5.25975	0.00449138
ERI2	ENSG00000196678	-0.650572	5.82979	0.00449667
PMAIP1	ENSG00000141682	-0.44987	4.04985	0.00449667
WDFY3-AS2	ENSG00000180769	0.852737	1.5043	0.00449667
RGS9	ENSG00000108370	0.686848	2.25316	0.00452294
TJP3	ENSG00000105289	0.788491	3.06956	0.00452294
EHF	ENSG00000135373	-0.610462	7.56019	0.0045311
SI	ENSG00000090402	0.861247	3.5977	0.00454087
ADSSL1	ENSG00000185100	0.589787	3.35181	0.00454901
BZW2	ENSG00000136261	-0.392189	6.11943	0.00459969
AMPD2	ENSG00000116337	0.368977	6.13945	0.0046194
KCNK5	ENSG00000164626	1.12673	1.22206	0.00462298
CKMT2-AS1	ENSG00000247572	-0.683033	3.11341	0.00464896
HADHB	ENSG00000138029	0.335462	6.89137	0.00466294
SOWAHB	ENSG00000186212	0.515948	4.23768	0.00466719
ATRN	ENSG00000088812	0.461595	6.1056	0.00469432
SLC38A6	ENSG00000139974	0.546875	3.53156	0.00470203
MIPEP	ENSG00000027001	-0.336458	5.603	0.0047438
HOGA1	ENSG00000241935	0.436527	3.89323	0.00475998
PTPRK	ENSG00000152894	0.573711	4.01127	0.00482992
TGFBRAP1	ENSG00000135966	-0.468923	4.89292	0.00483389
CEP44	ENSG00000164118	-0.601559	3.87567	0.00484445
ORMDL3	ENSG00000172057	-0.449359	5.31668	0.00486198
NUDT19	ENSG00000213965	-0.39151	6.50207	0.00486318
SREBF2	ENSG00000198911	-0.404724	8.14753	0.00491233
ZFAND1	ENSG00000104231	-0.511586	5.54623	0.00492127
HOXC4	ENSG00000198353	1.10789	1.72172	0.0049238
NLGN4Y	ENSG00000165246	0.693857	2.36304	0.0049302
ERP44	ENSG00000023318	-0.486641	6.04739	0.00493727
C7ORF73	ENSG00000243317	0.384443	6.47146	0.00493843
ARL2BP	ENSG00000102931	-0.402626	5.66299	0.00494393
AC009005.2	ENSG00000267751	0.610279	4.12162	0.0049566
GNS	ENSG00000135677	0.355853	7.11199	0.00496919
RAP2B	ENSG00000181467	0.477293	4.63889	0.00500254
SIAH1	ENSG00000196470	0.347552	5.57617	0.00501683
ADRB1	ENSG00000043591	-1.0981	1.38491	0.00503361
FAM69A	ENSG00000154511	0.972899	2.73535	0.00503631
ANKRD13A	ENSG00000076513	0.460027	5.71442	0.00505563
KIF3C	ENSG00000084731	0.625877	3.40455	0.00507541
ST3GAL4-AS1	ENSG00000280832	0.729615	2.20543	0.00513088
GCH1	ENSG00000131979	0.413709	4.87827	0.00516782
ARHGAP19	ENSG00000213390	-0.332791	5.84745	0.00518932
DRAM1	ENSG00000136048	0.499717	4.04124	0.00519011
CCDC83	ENSG00000150676	0.907591	1.70709	0.00520328
CLSTN3	ENSG00000139182	0.576407	4.8966	0.00521908
DNMT3A	ENSG00000119772	0.55835	4.41702	0.00521908
EXTL3	ENSG00000012232	0.450887	5.3489	0.00521908
PARP1	ENSG00000143799	-0.289147	8.95317	0.00526008
MSTO1	ENSG00000125459	-0.435402	5.48476	0.00529146
POLR2J4	ENSG00000214783	1.2329	0.813247	0.0052939
CNIH3	ENSG00000143786	1.13236	0.629765	0.00529762
LRP10	ENSG00000197324	0.541507	6.26071	0.00530573
PSD3	ENSG00000156011	-0.645743	4.84413	0.00531181
CRTC3	ENSG00000140577	0.456279	4.54254	0.00532012
COL4A5	ENSG00000188153	-0.439398	5.33496	0.00536115
RAB12	ENSG00000206418	0.471799	5.11298	0.00537674
ABCC5	ENSG00000114770	0.555048	5.79163	0.00540726
UCHL5	ENSG00000116750	-0.49717	5.88625	0.00541273
PSMB2	ENSG00000126067	-0.433691	7.42956	0.00545125
FAM136A	ENSG00000035141	-0.315389	5.71455	0.00547011
EFL1	ENSG00000140598	-0.472242	4.81027	0.0054705
ENOPH1	ENSG00000145293	-0.29492	6.81237	0.00552785
TRIM21	ENSG00000132109	0.463115	3.95655	0.00552785
ANXA5	ENSG00000164111	-0.397388	6.58914	0.00553529
PRKAA1	ENSG00000132356	-0.495896	7.33725	0.00554166
SNX27	ENSG00000143376	0.56701	5.76472	0.00556302
WASF2	ENSG00000158195	-0.427535	6.81283	0.00556302
LTBP1	ENSG00000049323	1.14757	1.64593	0.00560617
TRNAU1AP	ENSG00000180098	0.506096	4.96147	0.00560617
KLHDC10	ENSG00000128607	-0.475777	5.31547	0.00561821
PCYT2	ENSG00000185813	-0.508605	6.04897	0.00561821
ZC3H12A	ENSG00000163874	0.589631	4.6124	0.00562205
CUEDC1	ENSG00000180891	0.7632	3.67558	0.00562679
AKAP13	ENSG00000170776	-0.628593	5.24185	0.00562728
CDC6	ENSG00000094804	-0.303305	7.01275	0.00562885
AK6	ENSG00000085231	0.523396	5.15465	0.00563716
UGP2	ENSG00000169764	0.426288	5.19425	0.00564026
SNRNP200	ENSG00000144028	0.441195	8.30682	0.00564082
GLDC	ENSG00000178445	0.440169	3.70676	0.00569369
NUDT16P1	ENSG00000246082	-0.530008	4.27838	0.00569369
WDR44	ENSG00000131725	-0.518364	4.44747	0.00569369
CACNB2	ENSG00000165995	1.03039	1.83647	0.00573754
BAZ2A	ENSG00000076108	-0.533797	6.35834	0.00576087
MANEA	ENSG00000172469	0.63878	6.55335	0.00576087
TLL2	ENSG00000095587	0.929673	1.72448	0.00576087
NBEAL2	ENSG00000160796	-0.49935	6.32027	0.00576407
TMA16	ENSG00000198498	-0.376241	4.90357	0.00576407
STXBP5	ENSG00000164506	-0.720053	4.19274	0.00578355
TOX2	ENSG00000124191	0.876958	1.79835	0.00578658
MAP1LC3B	ENSG00000140941	0.414655	5.74183	0.00581467
KIF3B	ENSG00000101350	-0.374736	6.93476	0.00581889
MTHFR	ENSG00000177000	0.435988	5.37956	0.00582679
POLR3G	ENSG00000113356	0.535784	4.50552	0.00582679
FOXD3-AS1	ENSG00000230798	1.06745	0.647691	0.00584483
DPYSL5	ENSG00000157851	0.543631	4.29924	0.0058638
MARS2	ENSG00000247626	-0.437402	5.21354	0.00589865
AC136612.1	ENSG00000275869	1.4576	-0.0996222	0.00590077
CSTF3	ENSG00000176102	0.365711	5.96818	0.00590077
RGS10	ENSG00000148908	0.557122	4.78436	0.00590077
CENPI	ENSG00000102384	-0.67629	4.00317	0.00590938
RGS19	ENSG00000171700	0.627512	2.27712	0.0059318
STX2	ENSG00000111450	0.546395	3.8082	0.0059318
MOAP1	ENSG00000165943	0.319918	5.70532	0.00598267
CCDC149	ENSG00000181982	0.422609	4.6312	0.00599839
RPSAP53	ENSG00000214263	0.482039	3.89873	0.00599839
TGDS	ENSG00000088451	-0.636995	3.2891	0.00601094
TLR3	ENSG00000164342	-1.21219	0.498115	0.00603458
ARHGAP28	ENSG00000088756	-0.665268	4.16725	0.00604755
DPAGT1	ENSG00000172269	-0.357901	5.38096	0.00604755
KIF23	ENSG00000137807	-0.385481	5.55692	0.00604755
NGLY1	ENSG00000151092	-0.372064	5.58705	0.00604755
PALMD	ENSG00000099260	-0.856353	1.53543	0.00607698
CELSR2	ENSG00000143126	0.570853	5.64417	0.00608496
NUP93	ENSG00000102900	-0.318406	7.88713	0.00608496
RP11-597D13.7	ENSG00000251429	0.811777	2.23221	0.00609638
LINC01579	ENSG00000258754	-0.925769	1.36155	0.00613098
GPD1L	ENSG00000152642	-0.457161	5.21101	0.00615554
ADIPOR1	ENSG00000159346	0.322635	6.94777	0.00616819
NAF1	ENSG00000145414	-0.403738	4.06404	0.00620321
BET1	ENSG00000105829	0.496758	4.46585	0.00621457
DERL3	ENSG00000099958	-0.640063	3.13571	0.00621457
FAM234B	ENSG00000084444	0.346913	5.58258	0.00621457
HEG1	ENSG00000173706	0.809406	2.26567	0.00622734
ALDH2	ENSG00000111275	0.495007	5.44645	0.00624978
TOB1	ENSG00000141232	0.366785	6.90763	0.00625659
L3MBTL3	ENSG00000198945	-0.676371	3.39541	0.00628123
ITGA5	ENSG00000161638	0.449742	4.70728	0.00635065
ADAMTS7	ENSG00000136378	1.38943	0.728229	0.00636561
SYVN1	ENSG00000162298	-0.330058	6.14841	0.00636928
MTDH	ENSG00000147649	-0.363861	7.7854	0.00637853
SCML2	ENSG00000102098	-0.561872	4.18799	0.00643542
SLC16A1	ENSG00000155380	0.295919	7.17172	0.00644695
SLC11A1	ENSG00000018280	1.05541	1.60751	0.0064652
AK5	ENSG00000154027	1.316	0.264333	0.00646794
RNF168	ENSG00000163961	-0.434031	5.82057	0.00647625
GPR143	ENSG00000101850	1.21263	0.898848	0.00650037
DTX2P1-UPK3BP1-PMS2P11	ENSG00000265479	-0.546156	3.57101	0.00653472
SLC38A9	ENSG00000177058	0.473021	4.83659	0.00653472
KIAA1257	ENSG00000114656	0.488829	3.44809	0.00653994
FAM60A	ENSG00000139146	-0.370396	5.75614	0.0065495
RP11-307C12.11	ENSG00000232093	0.641339	2.93531	0.00656322
RP11-4L24.4	ENSG00000279561	0.705512	2.79292	0.00668268
RASA2	ENSG00000155903	-0.765443	3.37057	0.00669733
SH3BP1	ENSG00000100092	0.613046	4.21674	0.00670859
WWC3	ENSG00000047644	0.46059	5.0035	0.00670859
AC004381.6	ENSG00000005189	-0.391795	4.89443	0.00671909
MAGEE1	ENSG00000198934	0.433317	3.87673	0.00674428
TUBB4A	ENSG00000104833	0.564982	5.09468	0.00675437
SHROOM2	ENSG00000146950	-0.441251	5.19679	0.00675556
FAS	ENSG00000026103	-0.705077	2.75038	0.00677741
ELAC2	ENSG00000006744	0.30033	7.11928	0.00678153
MIER3	ENSG00000155545	0.587578	5.06605	0.00678901
UBQLN1	ENSG00000135018	-0.404235	7.66566	0.00678901
ZSCAN5A	ENSG00000131848	0.53715	2.7049	0.00679117
MAPRE1	ENSG00000101367	0.266706	7.52561	0.00679624
PLXNA3	ENSG00000130827	0.663189	4.02647	0.00679624
GATA2	ENSG00000179348	0.475706	7.59317	0.00680127
NDUFA5	ENSG00000128609	0.444187	6.41065	0.00680127
PSME1	ENSG00000092010	0.360297	6.18613	0.0068022
HMOX1	ENSG00000100292	0.626217	3.26512	0.00686353
TCOF1	ENSG00000070814	-0.341956	6.67176	0.00686817
RETSAT	ENSG00000042445	-0.33736	5.88794	0.00689815
SMOX	ENSG00000088826	0.573404	2.84696	0.00689815
PACSIN1	ENSG00000124507	0.611816	3.40654	0.00690272
RUNX1	ENSG00000159216	-1.05329	0.691487	0.00690272
PLA2G7	ENSG00000146070	1.04961	1.29379	0.00691847
SLC10A7	ENSG00000120519	-0.541796	4.23953	0.00692928
THUMPD1	ENSG00000066654	0.421243	6.12562	0.00699235
ITGB5	ENSG00000082781	0.41355	5.35627	0.00700828
GAS6-AS1	ENSG00000233695	-0.618072	3.78471	0.00701763
LRP6	ENSG00000070018	0.505005	5.04665	0.00706195
HN1L	ENSG00000206053	-0.325826	8.70165	0.00708981
CAMSAP2	ENSG00000118200	-0.54686	5.91023	0.00711418
BBS10	ENSG00000179941	-0.581749	4.58161	0.00715086
GLI3	ENSG00000106571	-0.812812	2.57054	0.00715086
PTCH1	ENSG00000185920	-0.664134	4.3654	0.00717282
ADCY7	ENSG00000121281	1.10037	0.977195	0.00721623
NAAA	ENSG00000138744	-0.327007	6.33252	0.00722665
UBQLN2	ENSG00000188021	0.302937	6.97154	0.00722665
RP11-848P1.4	ENSG00000266340	0.674196	1.7563	0.00723903
CTPS1	ENSG00000171793	-0.269621	6.44742	0.00724813
PSME4	ENSG00000068878	-0.366225	6.85504	0.00724813
PSMC6	ENSG00000100519	-0.371958	6.63243	0.00728533
ERO1A	ENSG00000197930	-0.427352	4.8727	0.00730565
APOD	ENSG00000189058	-0.714361	3.50697	0.0073157
PSEN1	ENSG00000080815	-0.379293	5.80756	0.00732867
TBCEL	ENSG00000154114	-0.466736	4.8931	0.00732869
CERS1	ENSG00000223802	0.960959	1.67742	0.00733673
RP1-172N19.5	ENSG00000269911	1.25167	0.654073	0.00735151
RAB31	ENSG00000168461	1.33351	1.30658	0.007352
STYX	ENSG00000198252	-0.431078	5.49559	0.00735446
IL11RA	ENSG00000137070	0.705659	2.28552	0.00740385
NFIB	ENSG00000147862	0.44398	5.73297	0.00744601
CFL2	ENSG00000165410	0.436937	5.26687	0.00745308
KHDRBS3	ENSG00000131773	0.543317	3.16773	0.00745308
METTL12	ENSG00000214756	-0.505739	3.77662	0.00752516
PPL	ENSG00000118898	0.52511	3.17451	0.00753624
KLK15	ENSG00000174562	-1.09947	0.843993	0.00757079
GRK3	ENSG00000100077	0.480676	4.7046	0.00757673
RP11-497H16.5	ENSG00000196302	0.72198	2.03653	0.00758604
ISM2	ENSG00000100593	0.698209	1.86557	0.00761205
FAM222A-AS1	ENSG00000255650	-1.0448	1.64369	0.00765125
DLL1	ENSG00000198719	0.905307	0.96846	0.00765157
MAP3K12	ENSG00000139625	0.554858	2.93631	0.00765157
FAM134A	ENSG00000144567	0.477775	5.98631	0.00765163
FAM86EP	ENSG00000251669	0.458303	4.11737	0.00765755
SVIL-AS1	ENSG00000224597	0.430612	3.74656	0.0076736
CYFIP2	ENSG00000055163	0.414524	6.3514	0.0076854
MINPP1	ENSG00000107789	0.444291	4.11088	0.0076854
MICU1	ENSG00000107745	0.274027	6.35222	0.00772691
TRMT1L	ENSG00000121486	-0.459501	5.06146	0.00779355
CTSB	ENSG00000164733	0.311778	6.97112	0.00779804
TRDMT1	ENSG00000107614	-0.594172	3.25289	0.00780831
WDHD1	ENSG00000198554	-0.378732	5.72332	0.00783308
HSPA13	ENSG00000155304	-0.51639	5.60797	0.00783858
ASAP3	ENSG00000088280	0.499723	3.7611	0.00784537
SPECC1L	ENSG00000100014	-0.415063	6.36172	0.007847
PIFO	ENSG00000173947	0.978755	0.767689	0.00785349
GMPPA	ENSG00000144591	-0.453744	4.97252	0.00786126
SLC37A4	ENSG00000137700	-0.464941	5.52272	0.00786126
CAPRIN2	ENSG00000110888	0.542659	5.06355	0.00787832
PARP9	ENSG00000138496	-0.430209	4.80018	0.00789588
TSPY3	ENSG00000228927	1.12081	0.554853	0.00790186
TMEM51	ENSG00000171729	0.717021	2.25177	0.0079034
SRGAP3	ENSG00000196220	0.575218	3.82913	0.00795234
GTF2IP4	ENSG00000233369	0.390218	6.07908	0.00796213
DONSON	ENSG00000159147	-0.501269	3.75068	0.007984
IFNAR1	ENSG00000142166	-0.487222	6.26384	0.00798839
RNF26	ENSG00000173456	-0.379901	6.62993	0.0080063
KDELC1	ENSG00000134901	0.569931	2.92226	0.00801253
LINC00511	ENSG00000227036	0.92475	0.708753	0.00806074
ATP9A	ENSG00000054793	0.514754	6.32029	0.00807357
KIF11	ENSG00000138160	0.432952	5.67176	0.00808659
CYB5A	ENSG00000166347	-0.406198	7.52204	0.00810005
SAPCD2	ENSG00000186193	-0.744474	6.44508	0.00810708
SLC44A3	ENSG00000143036	0.592531	2.68809	0.00814481
KIF9	ENSG00000088727	0.594109	4.27943	0.00815408
BRMS1L	ENSG00000100916	0.461208	4.13235	0.00818961
KANSL3	ENSG00000114982	-0.370601	5.92645	0.00823781
RP11-546D6.3	ENSG00000280120	-0.798549	2.01084	0.00823781
EFNA5	ENSG00000184349	-0.280054	6.6816	0.00827631
HOXC12	ENSG00000123407	0.579252	3.36932	0.00829771
PLCH1	ENSG00000114805	0.792062	2.65487	0.00830555
ROBO1	ENSG00000169855	0.630579	4.15637	0.00833552
RBP7	ENSG00000162444	0.793454	1.70257	0.00836979
RFC5	ENSG00000111445	-0.320042	5.90477	0.00837456
RFK	ENSG00000135002	-0.339225	6.06605	0.00837475
SETD6	ENSG00000103037	-0.388121	4.86107	0.00837475
TMEM38A	ENSG00000072954	0.705117	2.29819	0.00837475
GOLGA4	ENSG00000144674	0.612074	5.94025	0.00839123
XRCC3	ENSG00000126215	-0.591311	5.44873	0.00839123
NAIP	ENSG00000249437	0.6979	4.4342	0.00840124
ST3GAL5	ENSG00000115525	0.835457	1.39687	0.00840456
GTF2IP1	ENSG00000277053	0.389986	6.28103	0.00841631
VIPR1	ENSG00000114812	-0.405976	4.03607	0.0084318
ARSG	ENSG00000141337	-0.561133	4.06439	0.00847095
LSG1	ENSG00000041802	0.263552	6.72636	0.00847095
NOTCH3	ENSG00000074181	0.698833	4.55608	0.00847575
STOML1	ENSG00000067221	-0.75993	3.89117	0.00849646
SATB2	ENSG00000119042	0.682119	2.56037	0.00851771
FBXL3	ENSG00000005812	-0.438076	5.17351	0.00851845
ALB	ENSG00000163631	0.780829	1.76544	0.00856303
SEPT6	ENSG00000125354	0.37528	4.90566	0.0085748
TMEM144	ENSG00000164124	0.454245	5.01815	0.00860276
ACSL4	ENSG00000068366	0.810313	2.05037	0.00860933
NUPR1	ENSG00000176046	0.46571	7.83956	0.00860933
OTUD6B	ENSG00000155100	-0.520813	5.06259	0.00860933
CYR61	ENSG00000142871	-0.514025	3.28049	0.00867219
ISYNA1	ENSG00000105655	0.532459	5.20426	0.00867757
LINC01481	ENSG00000257815	0.7634	3.05253	0.00867757
ZC2HC1A	ENSG00000104427	-0.686476	3.4087	0.00868766
CDC25B	ENSG00000101224	-0.348607	6.57452	0.00869269
NANOS1	ENSG00000188613	1.1224	1.35794	0.00869269
ANKRD16	ENSG00000134461	0.539958	3.59566	0.00877627
KIAA1147	ENSG00000257093	0.47188	5.93347	0.00877627
TAGLN2	ENSG00000158710	-0.370308	7.27024	0.00877683
CH507-42P11.8	ENSG00000275993	0.590667	3.03252	0.00878543
SNED1	ENSG00000162804	0.760183	3.06896	0.00878543
ACO1	ENSG00000122729	0.320033	5.89308	0.00879684
RP11-881M11.4	ENSG00000256196	1.27041	0.138573	0.00881698
RP11-332M2.1	ENSG00000203644	-0.624783	4.08199	0.00883373
SCARF1	ENSG00000074660	1.27078	0.367262	0.00883373
YBX3	ENSG00000060138	-0.325871	7.90072	0.00884131
GTF2H3	ENSG00000111358	-0.322077	5.71123	0.00885327
NXF2B	ENSG00000269437	-0.500982	4.21266	0.00885754
PLEKHD1	ENSG00000175985	0.552323	3.15507	0.00887842
RP11-817O13.8	ENSG00000260274	-0.466156	3.64509	0.00887842
CHAC2	ENSG00000143942	-0.521623	3.70285	0.00893634
CDC42SE1	ENSG00000197622	-0.266415	6.91945	0.0089486
DARS	ENSG00000115866	-0.297542	6.4571	0.00896949
PDIK1L	ENSG00000175087	0.516866	3.61909	0.00896949
ATG14	ENSG00000126775	-0.467215	4.14516	0.00902007
SLC25A35	ENSG00000125434	0.427475	4.44783	0.00902227
EBF3	ENSG00000108001	1.32901	0.389471	0.0090906
MFN1	ENSG00000171109	-0.372411	6.42956	0.00912488
DTNA	ENSG00000134769	0.845721	1.5937	0.00912861
UBL7	ENSG00000138629	0.502599	5.58521	0.00914252
SLC22A15	ENSG00000163393	0.932783	1.27345	0.00915946
VWA2	ENSG00000165816	1.33719	1.19757	0.00929862
ZCCHC10	ENSG00000155329	-0.45585	4.28525	0.00930645
LRRC73	ENSG00000204052	1.54404	0.789845	0.00930793
AKIP1	ENSG00000166452	0.489022	4.89335	0.00933033
LPIN3	ENSG00000132793	0.523146	3.83612	0.00933033
ALDH3A2	ENSG00000072210	-0.267263	7.45304	0.00934422
KIAA1524	ENSG00000163507	-0.428799	5.04208	0.0093466
FAM46C	ENSG00000183508	-0.759845	2.72169	0.00935425
MRPS18A	ENSG00000096080	-0.466671	5.55188	0.00936476
RP11-39C10.1	ENSG00000250746	-0.493445	5.09223	0.00936815
DHX37	ENSG00000150990	-0.449321	5.14784	0.00937228
TFG	ENSG00000114354	0.280184	7.23882	0.00943407
LAMC1	ENSG00000135862	-0.401499	7.3849	0.00945765
RNF19A	ENSG00000034677	0.555357	4.88754	0.00946949
TIMM23B	ENSG00000204152	-0.421984	4.19222	0.00946949
PEBP4	ENSG00000134020	1.23132	0.324657	0.009517
ZBTB18	ENSG00000179456	0.515469	2.69587	0.009517
LINC00937	ENSG00000226091	1.09394	0.541566	0.00952306
BCORL1	ENSG00000085185	0.613556	3.1384	0.00953695
GLMP	ENSG00000198715	-0.341122	5.4947	0.00953695
RALGAPA1	ENSG00000174373	-0.611117	5.31241	0.00953695
RP11-83J16.1	ENSG00000231409	0.573497	5.87532	0.00953695
AGTRAP	ENSG00000177674	-0.566303	6.99798	0.00954517
MBTPS1	ENSG00000140943	0.331979	6.54119	0.0095575
BTN2A2	ENSG00000124508	0.490482	3.62269	0.00956129
JAGN1	ENSG00000171135	-0.343556	5.57658	0.00956129
NPIPA8	ENSG00000214940	0.451137	3.38771	0.00956129
ZBED5	ENSG00000236287	0.412736	5.61091	0.00957647
ORAI3	ENSG00000175938	0.711412	1.79469	0.00964265
NPIPB6	ENSG00000198156	0.770402	1.74093	0.00968894
PNO1	ENSG00000115946	-0.363181	4.6692	0.00973053
NFYB	ENSG00000120837	-0.363837	5.12954	0.00976553
EMB	ENSG00000170571	0.426651	6.5917	0.00976802
GGCT	ENSG00000006625	-0.461637	6.51158	0.00977622
PLCG2	ENSG00000197943	1.39867	0.439658	0.00981618
RP11-734K23.9	ENSG00000277701	0.894911	1.67787	0.00981618
THAP9-AS1	ENSG00000251022	0.457645	4.89762	0.00981618
XIAP	ENSG00000101966	-0.557545	6.01372	0.00988126
DDR1	ENSG00000204580	0.531046	6.68758	0.00990321
TMEM170A	ENSG00000166822	0.43601	4.67966	0.00990321
LTB4R	ENSG00000213903	0.496099	3.55519	0.00993706
NPHP1	ENSG00000144061	0.509912	2.99193	0.00994747
ADSL	ENSG00000239900	-0.321762	6.73944	0.00995653
CYB561A3	ENSG00000162144	0.429647	6.30507	0.00995653
ETFB	ENSG00000105379	0.575315	6.86489	0.00995653
VWA5A	ENSG00000110002	0.513481	2.81612	0.00998156
CDYL2	ENSG00000166446	-0.414775	4.83491	0.0100118
EFHB	ENSG00000163576	1.36618	0.0474948	0.0100379
CHTOP	ENSG00000160679	0.292217	6.60534	0.010053
OSER1	ENSG00000132823	0.434314	4.67394	0.010053
SHISA5	ENSG00000164054	0.423643	7.32784	0.0100962
ZSWIM5	ENSG00000162415	1.14617	0.842535	0.0100991
HSD17B7	ENSG00000132196	-0.40377	5.03338	0.0101282
PDSS2	ENSG00000164494	0.363403	5.22229	0.0101282
TMX1	ENSG00000139921	-0.338531	5.91809	0.0101282
RNPS1P1	ENSG00000250896	0.620321	3.34223	0.0101438
GOLM1	ENSG00000135052	-0.290516	8.12466	0.0101447
AHSA2	ENSG00000173209	0.551903	4.67519	0.0101459
KDELR2	ENSG00000136240	-0.264706	7.83702	0.0101459
PRR36	ENSG00000183248	0.590992	5.28355	0.0101459
GLE1	ENSG00000119392	0.292588	6.47157	0.0101505
ESPN	ENSG00000187017	1.02415	0.661496	0.010173
HAS3	ENSG00000103044	0.831836	1.5324	0.010173
HMGXB3	ENSG00000113716	-0.350683	6.43728	0.010173
SFXN1	ENSG00000164466	-0.255146	7.34867	0.010173
BMT2	ENSG00000164603	-0.602765	3.07667	0.0102317
KDM1B	ENSG00000165097	-0.635826	5.19369	0.0102723
SMYD5	ENSG00000135632	-0.381091	4.19589	0.0103015
PHIP	ENSG00000146247	-0.596671	5.87435	0.0103274
DTL	ENSG00000143476	-0.452081	5.3152	0.0103647
RAP1GAP	ENSG00000076864	0.507341	3.15984	0.0103647
NR2F1	ENSG00000175745	1.02105	0.570884	0.0104034
TNS2	ENSG00000111077	0.719716	2.39667	0.0104337
PLA2G12A	ENSG00000123739	-0.295654	6.20771	0.0104442
RILPL2	ENSG00000150977	0.429436	4.03812	0.0104452
DST	ENSG00000151914	-0.599532	4.26376	0.0104519
DSCC1	ENSG00000136982	-0.392284	5.05838	0.0104579
RRP15	ENSG00000067533	-0.338277	5.43142	0.0107184
A2ML1	ENSG00000166535	-0.897315	1.83525	0.0107188
NBEAP3	ENSG00000223875	0.647408	2.50436	0.0107188
C17ORF80	ENSG00000141219	-0.425111	4.82437	0.0107208
CSPG5	ENSG00000114646	0.43246	4.56113	0.0107922
TMEM198B	ENSG00000182796	0.436808	5.04777	0.0107922
TP53I11	ENSG00000175274	0.475429	5.14766	0.0107922
PIGN	ENSG00000197563	0.314023	5.89348	0.0108153
PDCL	ENSG00000136940	-0.45707	4.83951	0.0108346
WNT7B	ENSG00000188064	-0.498841	5.13948	0.0109597
H3F3C	ENSG00000188375	-0.522835	3.58613	0.0109691
PLEKHM1	ENSG00000225190	0.594419	3.96027	0.010981
RANBP10	ENSG00000141084	0.383274	5.42106	0.010981
TAPBP	ENSG00000231925	0.436168	6.37486	0.0109923
ITM2C	ENSG00000135916	0.394975	5.1392	0.0110385
LHFPL2	ENSG00000145685	0.754996	2.91368	0.0110434
NOP56	ENSG00000101361	-0.296712	8.37118	0.0110434
MAGT1	ENSG00000102158	-0.292301	7.12223	0.0111059
LRRC63	ENSG00000173988	-1.1757	0.249723	0.0111198
FAN1	ENSG00000198690	-0.295117	6.4429	0.0111296
MESDC1	ENSG00000140406	-0.727324	4.66974	0.0111497
TXNDC11	ENSG00000153066	-0.319146	5.91495	0.0111506
RP11-522I20.3	ENSG00000254473	-0.634692	2.87961	0.0112248
DYRK1A	ENSG00000157540	0.404014	5.86531	0.0112271
TMEM241	ENSG00000134490	-0.331664	5.30047	0.0112598
ARID1A	ENSG00000117713	-0.445299	6.80024	0.0112986
NCAPH	ENSG00000121152	-0.321516	6.05709	0.0113362
SHISA9	ENSG00000237515	0.969572	1.92711	0.0113403
ATP11B	ENSG00000058063	-0.520587	6.59453	0.0113766
CDCA3	ENSG00000111665	-0.368949	5.85687	0.0113769
RAPGEF5	ENSG00000136237	-0.51306	3.38185	0.0113874
HEATR1	ENSG00000119285	-0.451658	6.20528	0.0114021
MCMBP	ENSG00000197771	-0.293608	6.41384	0.0114021
RP3-428L16.2	ENSG00000272841	-0.505817	2.89318	0.0114021
SH3KBP1	ENSG00000147010	0.444148	4.27792	0.0115489
AMIGO1	ENSG00000181754	0.508706	3.17431	0.0115613
GAB1	ENSG00000109458	0.604722	2.59519	0.01159
MERTK	ENSG00000153208	0.669988	2.83452	0.0115954
KDM3A	ENSG00000115548	0.370741	4.50608	0.0116264
B4GALNT1	ENSG00000135454	0.59834	3.97782	0.0116292
LRRC40	ENSG00000066557	-0.738816	4.80486	0.0116292
ITPKB	ENSG00000143772	0.401557	4.98001	0.011676
TSKU	ENSG00000182704	-0.457162	4.5808	0.0117212
RHBDF1	ENSG00000007384	-0.362544	4.96842	0.0117259
RTN4IP1	ENSG00000130347	-0.424407	4.35825	0.0117295
RP11-403I13.5	ENSG00000232721	1.05682	1.15209	0.0117325
SOX11	ENSG00000176887	0.738301	1.88642	0.0117453
EPOR	ENSG00000187266	0.438532	3.53326	0.011751
U73166.2	ENSG00000230454	0.802844	1.5982	0.011751
VARS	ENSG00000204394	-0.413216	7.93576	0.011751
RP11-386M24.6	ENSG00000260337	-1.32441	0.974816	0.011771
AC005077.14	ENSG00000230882	-0.648725	3.56377	0.0117784
CPPED1	ENSG00000103381	0.372571	4.63254	0.0117784
OXA1L	ENSG00000155463	0.334791	7.14456	0.0117784
SPHK1	ENSG00000176170	0.87767	1.52381	0.0117784
FXR1	ENSG00000114416	-0.301534	7.07476	0.0118134
AC083873.4	ENSG00000237821	0.603009	2.32942	0.0118309
RP11-20D14.6	ENSG00000249790	-0.915648	1.35349	0.0118409
SGCB	ENSG00000163069	-0.440281	4.39373	0.0118772
AP000473.5	ENSG00000228798	0.860497	2.09831	0.0118826
GDI2	ENSG00000057608	0.278294	8.73502	0.0118826
WNK3	ENSG00000196632	0.569278	4.30168	0.0118826
SCHLAP1	ENSG00000281131	-0.510066	3.87929	0.0119132
UBE2H	ENSG00000186591	0.292253	6.75759	0.011922
CTD-2228K2.7	ENSG00000225138	0.882294	2.81739	0.011951
SCARA3	ENSG00000168077	1.13646	1.04156	0.0119657
DNAH6	ENSG00000115423	-0.93337	1.05208	0.0119962
TONSL	ENSG00000160949	-0.509492	6.37359	0.0120219
BAG2	ENSG00000112208	-0.459077	3.97067	0.0120691
AHNAK	ENSG00000124942	-0.537216	6.41392	0.0120957
LYPD3	ENSG00000124466	0.806049	1.66063	0.0120957
CEP19	ENSG00000174007	0.483442	2.74016	0.0121467
RP5-1092A3.4	ENSG00000270605	0.624902	3.08369	0.0121467
LRRC3	ENSG00000160233	0.605478	2.92862	0.0121872
LINC00665	ENSG00000232677	-0.331579	6.73946	0.0122334
CEBPD	ENSG00000221869	-0.839249	3.33401	0.0122408
SLC35A3	ENSG00000117620	-0.415674	5.82987	0.0122487
E2F3	ENSG00000112242	-0.328105	5.52841	0.0122745
SNURF	ENSG00000273173	0.933439	0.788228	0.0122745
FAM49B	ENSG00000153310	-0.356651	5.26055	0.0122954
MAK16	ENSG00000198042	-0.390293	6.42185	0.0123149
ARSB	ENSG00000113273	0.452035	4.27005	0.0123261
MYO5B	ENSG00000167306	0.600565	3.76178	0.0123496
BORCS7	ENSG00000166275	0.431824	4.77993	0.0123825
RP11-497H16.8	ENSG00000253333	0.697188	1.7206	0.0124266
CKS1BP2	ENSG00000225976	-0.919243	0.915409	0.0124334
HIC2	ENSG00000169635	-0.764348	2.36093	0.0124334
TOE1	ENSG00000132773	-0.372708	4.7658	0.0124383
TBC1D7	ENSG00000145979	0.574106	4.30698	0.0124901
ELK1	ENSG00000126767	-0.430827	5.04397	0.0125097
ZFYVE28	ENSG00000159733	0.834533	1.45394	0.0125222
ANTXR2	ENSG00000163297	0.764711	1.52335	0.0125666
ZNF530	ENSG00000183647	-0.454139	3.18789	0.0126013
ANKRD22	ENSG00000152766	-0.665905	2.4302	0.0126214
RABL2B	ENSG00000079974	0.361055	4.3206	0.0126502
SPRYD4	ENSG00000176422	-0.277178	6.13477	0.0126502
ACRC	ENSG00000147174	0.955128	1.01145	0.0126603
DPY19L1	ENSG00000173852	0.571984	3.19045	0.0126607
PCSK4	ENSG00000115257	0.646643	2.25766	0.0126607
KLHL2	ENSG00000109466	0.509371	3.71276	0.0126908
RNF157	ENSG00000141576	0.436787	4.96933	0.0126908
RP11-500C11.3	ENSG00000272269	-1.22228	0.664523	0.0126908
FBXO28	ENSG00000143756	-0.412604	6.60786	0.0127304
LAMB2	ENSG00000172037	0.362337	6.67025	0.0127304
TFEB	ENSG00000112561	0.624945	2.61359	0.0127951
AMOTL2	ENSG00000114019	0.864937	1.95982	0.012906
EFR3B	ENSG00000084710	0.665591	2.03986	0.012931
DGAT2	ENSG00000062282	0.398358	5.24186	0.0129434
LDLR	ENSG00000130164	-0.365144	6.52447	0.0129434
TMED2	ENSG00000086598	-0.294575	8.38765	0.0129926
WDR6	ENSG00000178252	0.34377	7.70466	0.0130002
TBL1X	ENSG00000101849	-0.312954	6.20976	0.0130189
MT1X	ENSG00000187193	0.486903	6.2817	0.013062
RP11-676J15.1	ENSG00000263958	0.663183	5.03942	0.0130876
MOB1A	ENSG00000114978	-0.448379	5.00069	0.0130934
AGAP12P	ENSG00000265018	-0.56873	2.77345	0.0132274
ABTB1	ENSG00000114626	0.802954	2.02477	0.01325
INTS8	ENSG00000164941	0.335543	6.40294	0.01325
POP1	ENSG00000104356	-0.3545	4.68319	0.0133399
OSTC	ENSG00000198856	-0.345424	6.7314	0.0133999
MSANTD4	ENSG00000170903	-0.433376	4.23084	0.0134095
GABARAPL2	ENSG00000034713	0.370484	6.81337	0.0134165
IMPA1	ENSG00000133731	-0.448156	5.37554	0.0134165
SLC25A40	ENSG00000075303	-0.440776	4.36078	0.0134165
DTX3	ENSG00000178498	0.690298	2.21082	0.0134215
AIM1	ENSG00000112297	-0.633848	2.6997	0.0134757
LGALS3BP	ENSG00000108679	0.669465	2.56761	0.0135412
MICALL2	ENSG00000164877	0.461018	3.83105	0.0135412
SERINC5	ENSG00000164300	0.480355	7.4543	0.0135517
RNFT2	ENSG00000135119	0.503036	4.23211	0.0135724
ARHGAP6	ENSG00000047648	-0.381378	5.81618	0.0135772
HTRA2	ENSG00000115317	0.408518	4.3307	0.0135772
PRICKLE3	ENSG00000012211	-0.584712	3.67405	0.0136069
RP11-48B3.4	ENSG00000260317	-1.17047	0.50367	0.0136161
ZNF217	ENSG00000171940	0.445203	7.10065	0.0136275
GPRC5B	ENSG00000167191	0.939219	2.28468	0.0136648
MUL1	ENSG00000090432	0.431081	4.98983	0.0137079
KTI12	ENSG00000198841	0.480208	3.82181	0.0137343
MTUS1	ENSG00000129422	0.510868	5.92167	0.0137369
SMAGP	ENSG00000170545	-0.60379	2.13498	0.0137542
GOLGA6L9	ENSG00000197978	0.466676	3.52817	0.0137736
NEIL3	ENSG00000109674	-0.372433	3.84482	0.0137736
SLC16A6	ENSG00000108932	-0.380418	4.21059	0.0137736
AHDC1	ENSG00000126705	0.653317	3.81201	0.0138097
ITGA1	ENSG00000213949	-0.897238	1.05528	0.0138154
CACUL1	ENSG00000151893	0.382078	5.2441	0.0138959
HPS5	ENSG00000110756	-0.36369	5.01063	0.0138959
PPP2R2C	ENSG00000074211	0.403391	5.15919	0.0139483
CHD4	ENSG00000111642	0.268748	8.30499	0.0139484
RP11-1280N14.3	ENSG00000251634	0.750577	2.66723	0.0139484
WWC2	ENSG00000151718	1.14762	0.206718	0.0139484
RP11-498C9.15	ENSG00000263731	0.475131	3.47155	0.0139955
CWF19L2	ENSG00000152404	-0.419917	4.13938	0.0140038
SLC39A1	ENSG00000143570	-0.421887	6.10099	0.0140038
MAT1A	ENSG00000151224	-0.96964	0.610243	0.0140408
ZDHHC16	ENSG00000171307	0.280432	5.69383	0.0140408
DNAJC10	ENSG00000077232	-0.389904	6.66072	0.0140641
ZNF213-AS1	ENSG00000263072	0.475377	3.96123	0.0140641
RAB40B	ENSG00000141542	0.388047	4.90565	0.014081
RP11-253E3.3	ENSG00000250899	-0.955994	2.44343	0.0141022
PEX13	ENSG00000162928	0.41015	5.58997	0.0141501
CAMK2B	ENSG00000058404	0.548012	3.59532	0.0141749
COG6	ENSG00000133103	-0.478172	4.22409	0.0142459
PRKAG2	ENSG00000106617	0.320033	4.81998	0.0142459
SULT2B1	ENSG00000088002	0.671779	2.7554	0.0143105
FBXO21	ENSG00000135108	-0.363329	6.03178	0.0144443
TTLL4	ENSG00000135912	-0.41909	4.15282	0.0144443
CCDC74A	ENSG00000163040	0.480782	3.10899	0.0144444
CTSA	ENSG00000064601	0.270102	5.25638	0.0144652
PINK1-AS	ENSG00000117242	0.673699	2.84452	0.0145012
RIOK1	ENSG00000124784	-0.385939	4.48416	0.0145217
ERRFI1	ENSG00000116285	-0.289234	5.24277	0.0145807
DYNC1LI1	ENSG00000144635	-0.335917	6.26587	0.0146431
RNF114	ENSG00000124226	-0.28227	6.27961	0.0146494
PDZD4	ENSG00000067840	1.24123	0.628872	0.0146632
CCNB1	ENSG00000134057	-0.244712	8.08679	0.0146786
AP003068.23	ENSG00000254614	0.827989	1.01804	0.0147163
STK32A	ENSG00000169302	1.07144	0.910486	0.0147642
ANKS1B	ENSG00000185046	0.699506	1.44499	0.0147684
CTC-338M12.5	ENSG00000250222	0.742282	2.63766	0.0147735
GREB1	ENSG00000196208	-0.573836	4.92849	0.0147983
TEKT4P2	ENSG00000188681	0.805714	1.62238	0.0147983
PUDP	ENSG00000130021	-0.389328	4.65012	0.0148406
DISP1	ENSG00000154309	0.653851	2.23799	0.0149024
TOX3	ENSG00000103460	0.481257	3.85914	0.0149024
CLGN	ENSG00000153132	-0.376698	6.37667	0.0149584
EIF4G2	ENSG00000110321	-0.427623	10.1453	0.0149742
LINC01278	ENSG00000235437	-0.442197	6.24774	0.0149742
FAM175A	ENSG00000163322	0.497025	2.93988	0.0150065
ORC6	ENSG00000091651	-0.279023	5.65405	0.0150065
TTC27	ENSG00000018699	-0.304613	4.72142	0.0150065
SH3PXD2B	ENSG00000174705	0.459959	4.85293	0.0150115
ERI1	ENSG00000104626	-0.399561	4.62125	0.0150246
RABL2A	ENSG00000144134	0.47654	3.60183	0.0150378
RCBTB2	ENSG00000136161	0.647524	2.35904	0.0150378
SNX11	ENSG00000002919	-0.372335	4.3673	0.0150378
RHOF	ENSG00000139725	0.496877	3.21605	0.0150523
ST6GAL1	ENSG00000073849	1.04903	1.10519	0.015096
KLF6	ENSG00000067082	-0.438221	4.05111	0.0151177
ATG4B	ENSG00000168397	0.31022	5.8032	0.015154
PCED1A	ENSG00000132635	0.547577	4.91758	0.0151623
TSTD3	ENSG00000228439	0.515483	2.66825	0.0151623
SP3	ENSG00000172845	0.377839	6.0859	0.0152005
WNK2	ENSG00000165238	0.464409	5.67831	0.0153116
ALG10B	ENSG00000175548	-0.498027	5.06365	0.0153143
TCEB3	ENSG00000011007	-0.292365	6.35779	0.015333
PANK1	ENSG00000152782	0.437423	4.05118	0.0153658
BX004987.1	ENSG00000278704	-0.613716	3.57785	0.0154939
RBP5	ENSG00000139194	1.16919	0.960867	0.0155187
YAF2	ENSG00000015153	-0.495423	3.66872	0.0155363
CDK2AP2	ENSG00000167797	-0.487198	6.72861	0.0155614
PTPRR	ENSG00000153233	0.483705	3.75165	0.0155721
TTC26	ENSG00000105948	-0.422046	4.28456	0.0155723
F8	ENSG00000185010	0.417366	3.9304	0.0155884
MTERF4	ENSG00000122085	-0.261498	6.10475	0.0155884
SNX10	ENSG00000086300	-0.470778	3.8582	0.0155884
HIST1H2AE	ENSG00000277075	0.63178	2.94426	0.0156416
PRMT3	ENSG00000185238	-0.42463	5.34555	0.0156416
MRS2	ENSG00000124532	-0.283916	5.82321	0.015656
PRRC2C	ENSG00000117523	-0.600945	7.55813	0.0156889
TIPIN	ENSG00000075131	-0.461812	4.80247	0.0157046
MKRN3	ENSG00000179455	-0.457625	3.53325	0.0157101
SLC29A4	ENSG00000164638	0.484876	3.62884	0.0158195
ATP2B1	ENSG00000070961	0.398495	7.12567	0.0158433
ACAT1	ENSG00000075239	0.340304	7.16418	0.0158651
RP4-775C13.1	ENSG00000234241	-0.45356	3.093	0.0158943
NDUFA4L2	ENSG00000185633	1.00557	1.99005	0.0159197
MFGE8	ENSG00000140545	0.418295	3.83515	0.0159466
[truncated: 1,007 more rows]

## Sheet: Enz vs DMSO
Symbol	Ensembl Gene ID	logFC	logCPM	FDR
ST6GALNAC1	ENSG00000070526	-2.9169	3.945	3.60319e-13
PMEPA1	ENSG00000124225	-2.11683	5.76215	6.23685e-13
NKX3-1	ENSG00000167034	-2.44646	7.99173	9.25237e-13
KLK3	ENSG00000142515	-3.08458	8.07693	1.30267e-12
CHRNA2	ENSG00000120903	-4.80462	3.40256	1.9175e-12
C1ORF116	ENSG00000182795	-1.69604	6.88595	1.95801e-11
TMPRSS2	ENSG00000184012	-1.68248	6.98251	2.45627e-11
SLC45A3	ENSG00000158715	-2.10944	6.68352	4.54796e-11
LAMA1	ENSG00000101680	-2.67049	3.55969	1.23234e-10
KLK2	ENSG00000167751	-3.71062	5.81398	1.70434e-10
ADAM7	ENSG00000069206	-3.02212	3.3751	3.49852e-10
OPRK1	ENSG00000082556	1.89022	4.14327	3.49852e-10
KLK4	ENSG00000167749	-1.37235	6.03606	1.08484e-09
TRGC1	ENSG00000211689	-2.9073	2.99304	2.47159e-09
RP11-244H18.1	ENSG00000276888	-3.43744	1.87944	3.95297e-09
KCNN2	ENSG00000080709	-1.03671	5.89816	9.81965e-09
TRPM8	ENSG00000144481	-3.13087	3.12487	9.81965e-09
TMEFF2	ENSG00000144339	-1.02392	7.4617	6.23444e-08
TRIM49D2	ENSG00000233802	-2.69028	2.88395	7.51938e-08
LL22NC03-N64E9.1	ENSG00000271127	-1.45042	4.18488	1.04183e-07
HERC3	ENSG00000138641	-1.17236	6.97362	1.04183e-07
STK39	ENSG00000198648	-0.914047	6.51054	1.2343e-07
GPR158	ENSG00000151025	-1.35215	5.93545	1.44566e-07
MBOAT2	ENSG00000143797	-1.18858	6.90925	1.44566e-07
RHOU	ENSG00000116574	-1.15272	5.43316	1.8822e-07
ALDH1A3	ENSG00000184254	-1.0784	4.78048	1.8822e-07
ELOVL7	ENSG00000164181	-1.45209	5.63035	1.8822e-07
ENDOD1	ENSG00000149218	-0.901155	7.89445	2.62843e-07
HOMER2	ENSG00000103942	-0.786099	6.70948	2.6387e-07
UAP1	ENSG00000117143	-0.927557	7.5394	3.14013e-07
LPAR3	ENSG00000171517	-0.813675	6.32609	3.4999e-07
ANKH	ENSG00000154122	-0.782853	6.53105	6.97471e-07
DEGS1	ENSG00000143753	-0.861761	8.20687	6.9772e-07
RASSF3	ENSG00000153179	-0.905687	8.19967	7.29354e-07
F5	ENSG00000198734	-1.63066	4.18258	8.5269e-07
GRB10	ENSG00000106070	0.79575	8.24043	8.57368e-07
TRIM49D1	ENSG00000223417	-2.53713	2.92587	8.76863e-07
HPGD	ENSG00000164120	-3.04692	1.15726	8.76863e-07
THBS1	ENSG00000137801	-1.12246	3.88064	1.22012e-06
CTD-2314B22.1	ENSG00000258314	-2.08345	3.08705	1.64349e-06
CENPN	ENSG00000166451	-0.725586	6.52686	1.85905e-06
ZBTB10	ENSG00000205189	-1.06703	5.61522	2.38353e-06
CYP11A1	ENSG00000140459	-1.65131	1.74679	2.95104e-06
F2RL1	ENSG00000164251	-0.933359	5.48004	3.00933e-06
ELOVL5	ENSG00000012660	-0.937962	7.93014	3.07536e-06
ELL2	ENSG00000118985	-0.860292	6.26889	3.08606e-06
KCNMA1	ENSG00000156113	-0.759353	5.92349	3.40399e-06
GUSBP1	ENSG00000183666	0.808953	4.8988	3.96008e-06
C5ORF66	ENSG00000224186	0.893803	5.35652	3.96008e-06
ATP1B1	ENSG00000143153	0.709778	9.23055	4.40034e-06
FAM174B	ENSG00000185442	-0.921919	5.59207	4.56189e-06
PDE9A	ENSG00000160191	-0.899635	5.10009	4.6575e-06
FAM105A	ENSG00000145569	-1.19125	3.7533	5.44158e-06
TMTC2	ENSG00000179104	-1.28528	3.79009	5.50461e-06
AADAT	ENSG00000109576	-1.02224	5.93776	5.62066e-06
IGF1R	ENSG00000140443	-1.25286	4.46203	6.71494e-06
CBLN2	ENSG00000141668	1.27671	3.80906	7.46502e-06
MAN1A1	ENSG00000111885	1.56163	3.46725	7.79123e-06
OCLN	ENSG00000197822	0.88974	6.63608	1.10287e-05
MAF	ENSG00000178573	-1.46706	2.94975	1.1375e-05
ARHGEF26	ENSG00000114790	-0.784626	7.49822	1.25821e-05
FKBP5	ENSG00000096060	-0.766022	6.39943	1.4089e-05
MCCC2	ENSG00000131844	-0.842237	8.72645	1.48884e-05
RAB6C-AS1	ENSG00000225449	-0.70851	5.13668	1.80482e-05
TP53INP1	ENSG00000164938	0.761515	7.67212	1.8779e-05
PEX10	ENSG00000157911	-0.894686	7.16606	1.92941e-05
LINC01297	ENSG00000225255	-2.02803	3.98557	1.92941e-05
MAFB	ENSG00000204103	-0.7437	5.88716	1.95156e-05
LRRN1	ENSG00000175928	1.02502	5.73933	2.04646e-05
CSMD1	ENSG00000183117	1.06835	5.87494	2.05941e-05
DDC	ENSG00000132437	0.750177	7.57853	2.10649e-05
SGK223	ENSG00000275342	-1.25037	2.46599	2.50819e-05
IL1RN	ENSG00000136689	1.33891	3.0821	2.50819e-05
COL5A2	ENSG00000204262	1.42376	2.81417	2.67195e-05
RP11-315E17.1	ENSG00000258162	1.24469	5.50347	2.68584e-05
RP11-379B18.5	ENSG00000241288	1.22167	2.99295	2.9032e-05
IQGAP2	ENSG00000145703	-0.938514	5.06855	3.1694e-05
NIPSNAP3A	ENSG00000136783	0.702658	7.16628	3.49624e-05
AFF3	ENSG00000144218	-1.114	3.19712	3.49624e-05
ACE2	ENSG00000130234	-1.91277	1.37502	3.63217e-05
SOX9	ENSG00000125398	1.14838	4.00838	3.86628e-05
INSIG2	ENSG00000125629	0.892973	5.1236	4.00343e-05
PLPP1	ENSG00000067113	-0.69948	6.78205	4.1688e-05
PRR15L	ENSG00000167183	-0.706154	4.63715	4.53806e-05
ZBTB43	ENSG00000169155	0.714019	5.30872	5.69415e-05
RAB27A	ENSG00000069974	-0.72248	4.33045	5.69415e-05
RDH10	ENSG00000121039	0.618217	6.06429	6.1583e-05
TLE1	ENSG00000196781	0.709095	4.66268	6.61039e-05
CTBP1-AS	ENSG00000280927	-2.14628	0.688168	7.0101e-05
C19ORF48	ENSG00000167747	-1.0627	8.00033	7.90441e-05
PLD1	ENSG00000075651	1.58593	2.32189	7.90441e-05
KLKP1	ENSG00000197588	-1.20088	2.07732	8.4363e-05
ZNF812P	ENSG00000224689	-1.64227	2.00089	8.99776e-05
SRCIN1	ENSG00000277363	1.24235	3.84201	8.99776e-05
AC018804.3	ENSG00000224087	-3.01616	1.20663	9.07622e-05
MID1	ENSG00000101871	1.39855	1.8797	9.58148e-05
MANBA	ENSG00000109323	0.651494	5.0654	9.58148e-05
GRAMD1C	ENSG00000178075	0.954654	3.70271	9.73566e-05
PNMA1	ENSG00000176903	-0.894866	4.52895	0.000103921
MAOA	ENSG00000189221	-0.637247	7.92758	0.000103921
GOLGA6L9	ENSG00000197978	0.889981	3.52817	0.000125814
DHCR24	ENSG00000116133	-0.686093	10.1158	0.000127599
LRRC31	ENSG00000114248	2.17113	1.22406	0.000127599
COLEC12	ENSG00000158270	0.588541	6.15312	0.000127599
PPFIBP2	ENSG00000166387	-0.66941	5.25537	0.000140917
SORD	ENSG00000140263	-0.476336	8.77094	0.000145501
ZNF385B	ENSG00000144331	-1.21452	2.41078	0.000168467
BMPR1B	ENSG00000138696	-1.47032	1.58886	0.000174249
AMOTL1	ENSG00000166025	1.30032	2.57831	0.000175924
GLMP	ENSG00000198715	-0.600341	5.4947	0.000177159
RP11-1081M5.1	ENSG00000253369	0.748296	4.27398	0.000177159
SLC44A1	ENSG00000070214	0.644731	6.38175	0.000178658
RFX3	ENSG00000080298	1.24933	3.4424	0.000181478
RAB3B	ENSG00000169213	-0.839903	5.63224	0.000181478
SORD2P	ENSG00000259479	-0.464955	7.68351	0.000199212
ORC5	ENSG00000164815	-0.667343	5.79139	0.000200808
SLC7A5	ENSG00000103257	0.91368	3.66926	0.000212003
ASAP2	ENSG00000151693	0.743127	5.09817	0.000212003
NUCB2	ENSG00000070081	0.703397	7.37684	0.000212003
TLL1	ENSG00000038295	1.23724	3.41302	0.000212029
HMGCS2	ENSG00000134240	0.655762	5.36837	0.000212029
MYLK	ENSG00000065534	1.68227	2.36235	0.000217687
HOXC13-AS	ENSG00000249641	0.885185	2.73935	0.000225568
TMEM79	ENSG00000163472	-0.95147	3.90367	0.000229811
AZGP1	ENSG00000160862	-0.779225	4.88052	0.000232456
TOX3	ENSG00000103460	0.93542	3.85914	0.000232456
EFCAB12	ENSG00000172771	-0.918291	2.76155	0.000233392
TRPS1	ENSG00000104447	0.881961	4.74564	0.000243173
MPC2	ENSG00000143158	-0.697216	8.3305	0.000252669
CLU	ENSG00000120885	0.674855	5.1006	0.000261903
CROT	ENSG00000005469	-0.749832	4.72125	0.000278496
ABHD2	ENSG00000140526	-0.663707	8.49237	0.000289602
LINC01296	ENSG00000244306	-0.690402	6.39711	0.000291219
MFSD6	ENSG00000151690	0.592698	4.65461	0.000293678
RP11-134L10.1	ENSG00000272941	1.19212	1.73209	0.000301608
C3ORF58	ENSG00000181744	-0.807968	3.8545	0.000324129
KCNU1	ENSG00000215262	2.53732	1.46005	0.000334506
MYO1B	ENSG00000128641	-0.811194	5.6684	0.000334506
USP43	ENSG00000154914	-0.603628	4.42679	0.000347551
NKILA	ENSG00000278709	-1.16119	2.22221	0.00036858
ST5	ENSG00000166444	0.680802	4.20632	0.000372021
CCDC83	ENSG00000150676	1.51405	1.70709	0.000375976
BTG1	ENSG00000133639	-0.579806	6.2007	0.000400071
GUSBP9	ENSG00000215630	0.764741	3.15645	0.000404304
SEMA6A	ENSG00000092421	0.722021	6.63181	0.000404304
TMEM140	ENSG00000146859	0.81646	3.49508	0.000404304
TNFSF15	ENSG00000181634	0.832994	3.91642	0.000404971
RP11-231E6.1	ENSG00000243081	2.07745	0.482264	0.000422594
CCNG2	ENSG00000138764	0.610026	5.61928	0.000430369
SYTL2	ENSG00000137501	0.824494	4.79156	0.000433622
TAPT1	ENSG00000169762	0.568323	5.14186	0.000433622
TNFAIP8	ENSG00000145779	-0.746852	4.21089	0.000443818
SELENBP1	ENSG00000143416	0.624638	9.12152	0.000451068
HOXC13	ENSG00000123364	0.86661	4.20217	0.000457926
TMEM38B	ENSG00000095209	0.676298	6.47094	0.000468662
CDC42EP3	ENSG00000163171	-0.733512	4.31463	0.000475157
SESN1	ENSG00000080546	0.533057	6.90205	0.000475819
UGT2B15	ENSG00000196620	0.624568	7.48331	0.000475819
GREB1	ENSG00000196208	-0.939391	4.92849	0.000485299
ACSL3	ENSG00000123983	-0.571461	7.58057	0.000509947
CYTH1	ENSG00000108669	-0.596127	5.44315	0.000522579
SPTLC3	ENSG00000172296	0.6198	4.73317	0.000522579
GLRX2	ENSG00000023572	-0.608467	4.27902	0.000527766
MYB	ENSG00000118513	0.848021	3.58851	0.000536972
AMIGO2	ENSG00000139211	0.962327	2.83017	0.000614698
SLFN5	ENSG00000166750	0.729335	5.59685	0.000655119
ATP2B1	ENSG00000070961	0.689933	7.12567	0.000662353
ABTB2	ENSG00000166016	0.816487	3.97508	0.000695079
C1QTNF6	ENSG00000133466	1.05364	3.49125	0.00069618
GOLGA6L4	ENSG00000184206	0.830734	2.89171	0.000735404
SELENOP	ENSG00000250722	-0.50813	6.32289	0.000738543
SOX4	ENSG00000124766	0.57488	6.68521	0.000785643
PLK2	ENSG00000145632	-0.588222	5.06044	0.000785643
CNGB3	ENSG00000170289	-1.47997	1.35571	0.000801003
ACPP	ENSG00000014257	0.721581	5.34084	0.000871355
ABCG2	ENSG00000118777	1.45153	1.98384	0.000879505
TBRG1	ENSG00000154144	-0.457263	7.0148	0.000879935
GRHL1	ENSG00000134317	0.590565	4.02	0.000898431
NCOA7	ENSG00000111912	0.752355	5.65516	0.00099274
AZGP1P1	ENSG00000214313	-1.2217	1.3742	0.00106975
SLC16A6	ENSG00000108932	-0.578512	4.21059	0.00113678
ENC1	ENSG00000171617	0.500274	5.39762	0.00113678
ZBTB16	ENSG00000109906	-1.24763	3.19263	0.0011486
CDK8	ENSG00000132964	0.595551	5.09015	0.00116228
TSHZ3	ENSG00000121297	1.27726	1.60771	0.00116228
KLHL24	ENSG00000114796	0.63484	4.23758	0.00117205
CA5BP1	ENSG00000186312	-0.662424	3.77561	0.00118749
FAM184B	ENSG00000047662	1.0508	1.88321	0.00120554
BAMBI	ENSG00000095739	0.496691	5.87925	0.00120554
NIPAL1	ENSG00000163293	0.700744	4.03128	0.00132243
OGFRL1	ENSG00000119900	0.607014	6.60496	0.001427
POP1	ENSG00000104356	-0.523051	4.68319	0.00142992
DENND1B	ENSG00000213047	0.873637	4.9491	0.00142992
PAK1IP1	ENSG00000111845	-0.57228	5.57278	0.00143212
CLGN	ENSG00000153132	-0.579633	6.37667	0.00143702
ABCA1	ENSG00000165029	1.3106	1.57899	0.00143702
FAM13A-AS1	ENSG00000248019	-1.00652	2.4672	0.00144061
MYRIP	ENSG00000170011	0.656325	4.86006	0.00144487
PITHD1	ENSG00000057757	-0.455397	5.55186	0.00144487
RP11-342D14.1	ENSG00000229491	1.55937	0.98833	0.00145307
NEDD9	ENSG00000111859	0.707145	3.5389	0.00162878
PLA1A	ENSG00000144837	-0.89957	2.52495	0.00163004
OACYLP	ENSG00000224367	-1.01308	2.40784	0.00165295
PRPS1	ENSG00000147224	-0.366207	7.10551	0.00165989
HEBP2	ENSG00000051620	-0.562476	7.25659	0.00169297
NAPEPLD	ENSG00000161048	0.910204	4.30156	0.00174128
SI	ENSG00000090402	1.15691	3.5977	0.00181768
PBX1	ENSG00000185630	0.649212	4.6162	0.00181768
HOXC9	ENSG00000180806	0.861597	3.24304	0.00184441
SLC25A33	ENSG00000171612	-0.461102	6.76795	0.00194607
NADK2	ENSG00000152620	0.408219	7.48019	0.00199547
PDIA5	ENSG00000065485	-0.510195	5.87751	0.00207918
ARG2	ENSG00000081181	-0.569523	7.13164	0.00207918
ASRGL1	ENSG00000162174	-0.70569	4.0831	0.0022295
SIPA1L2	ENSG00000116991	-0.614221	5.04698	0.00223153
PRIM2	ENSG00000146143	-0.564105	4.09883	0.00229424
ITPR1	ENSG00000150995	1.01907	4.55729	0.00234092
WNT7B	ENSG00000188064	-0.671466	5.13948	0.0023432
YAP1	ENSG00000137693	0.662662	6.14705	0.00241392
RP11-1280N14.3	ENSG00000251634	1.0608	2.66723	0.00247529
RP11-1023L17.1	ENSG00000215158	0.785741	4.18073	0.00249348
SORBS1	ENSG00000095637	0.690881	3.1587	0.00254692
TSPAN3	ENSG00000140391	0.424709	6.96427	0.00262505
AC020571.3	ENSG00000229056	-1.23092	1.83245	0.0026311
PLXDC2	ENSG00000120594	0.826987	3.6938	0.00265473
DUSP4	ENSG00000120875	-0.608208	4.14042	0.00267092
SSBP2	ENSG00000145687	0.648463	4.27331	0.002875
RAB32	ENSG00000118508	-0.788019	3.51243	0.00292447
FAM198B	ENSG00000164125	0.638985	7.66407	0.00292447
TMEM164	ENSG00000157600	-0.44302	5.54779	0.0030286
NDRG1	ENSG00000104419	-0.584895	5.81492	0.00305864
COLCA1	ENSG00000196167	0.720254	6.73356	0.00305864
RP11-356O9.2	ENSG00000259087	1.86257	0.893485	0.00316225
ATP8A1	ENSG00000124406	0.945481	2.94726	0.00317783
JAKMIP1	ENSG00000152969	0.678261	3.82138	0.00317811
RP11-816J6.3	ENSG00000269889	1.40824	0.767357	0.00319399
ANKRD16	ENSG00000134461	0.736616	3.59566	0.0032199
EXTL2	ENSG00000162694	-0.589672	3.91823	0.00335597
LASP1	ENSG00000002834	0.379544	7.43664	0.00362009
SRGAP3	ENSG00000196220	0.770781	3.82913	0.00362009
PCNX2	ENSG00000135749	-0.478011	5.3594	0.00362009
RAB4A	ENSG00000168118	-0.398713	6.07139	0.0036635
TFPI	ENSG00000003436	-0.737818	5.30134	0.0036635
RP11-195E2.1	ENSG00000230847	1.17603	2.67325	0.00366861
HACL1	ENSG00000131373	0.470411	6.19129	0.0038103
COBL	ENSG00000106078	0.552542	5.26455	0.00398625
FECH	ENSG00000066926	-0.319605	8.07429	0.00401448
IL4R	ENSG00000077238	0.793113	2.45084	0.00407521
PLPP5	ENSG00000147535	-0.43925	6.88495	0.00410553
EFNA5	ENSG00000184349	-0.354727	6.6816	0.00413481
LINC00936	ENSG00000271614	0.768789	2.91775	0.00416105
SDC4	ENSG00000124145	0.58352	6.27104	0.00427095
ERBIN	ENSG00000112851	0.658953	6.58847	0.00427713
CRLS1	ENSG00000088766	-0.529669	6.30261	0.00428309
PIK3AP1	ENSG00000155629	-0.862765	2.38782	0.00434725
PCED1B	ENSG00000179715	1.07141	1.55758	0.00445548
TRIM45	ENSG00000134253	0.678964	3.48269	0.00447127
CREBRF	ENSG00000164463	0.814322	2.51999	0.00457678
RP11-597D13.9	ENSG00000248429	0.799847	3.4646	0.00476572
MTMR9	ENSG00000104643	-0.624557	5.2629	0.00476572
HBEGF	ENSG00000113070	0.639393	3.22814	0.004953
CDH3	ENSG00000062038	0.709251	3.83151	0.00495486
RBM24	ENSG00000112183	-0.60384	3.87544	0.00498206
RP11-1415C14.3	ENSG00000253816	0.878024	2.24282	0.00498206
SLC25A37	ENSG00000147454	-0.376347	6.77763	0.00504733
ABHD18	ENSG00000164074	0.617964	4.36935	0.00514149
VWA2	ENSG00000165816	1.76842	1.19757	0.00516638
KRT19	ENSG00000171345	-1.44958	1.57604	0.00524892
ABCC4	ENSG00000125257	-0.613616	7.06078	0.00533436
TRAF3IP2	ENSG00000056972	0.465783	4.60624	0.00537558
EPDR1	ENSG00000086289	-0.812544	2.67095	0.00547678
HMGCR	ENSG00000113161	-0.437983	7.06637	0.00554779
NAIP	ENSG00000249437	0.875547	4.4342	0.00555058
BCHE	ENSG00000114200	0.485628	6.82682	0.00564969
TBC1D1	ENSG00000065882	-0.393694	6.44627	0.00564969
IRF1	ENSG00000125347	0.90634	2.36507	0.00592824
GNMT	ENSG00000124713	-0.877781	3.1409	0.00602239
GUSBP2	ENSG00000241549	0.844601	3.11649	0.00603647
SGPL1	ENSG00000166224	0.463643	6.55672	0.00622443
MYNN	ENSG00000085274	0.684918	5.22878	0.00623554
PRSS23	ENSG00000150687	0.6826	2.90854	0.00623554
PGM2L1	ENSG00000165434	0.995485	2.31452	0.00623554
TEAD2	ENSG00000074219	0.738032	3.11621	0.00664015
CAMK2N1	ENSG00000162545	0.478042	9.18248	0.00664015
CDH26	ENSG00000124215	0.632107	4.84853	0.00670967
EGLN3	ENSG00000129521	0.435768	4.62317	0.00673111
DUSP5	ENSG00000138166	0.790209	2.08039	0.0068286
IRF6	ENSG00000117595	0.351107	6.207	0.00685464
DGKH	ENSG00000102780	0.770906	6.50207	0.00687879
PPP1R14C	ENSG00000198729	0.903023	3.08589	0.00731689
OTULIN	ENSG00000154124	-0.438239	5.25975	0.00731689
PRKCA	ENSG00000154229	0.589132	3.89144	0.00745411
ADRB2	ENSG00000169252	-0.522911	4.53953	0.00750249
GOLGA6L5P	ENSG00000230373	0.95467	2.27747	0.0075428
RNF43	ENSG00000108375	0.499485	4.17919	0.00756155
MAK	ENSG00000111837	-1.25016	0.902615	0.00766388
RNF41	ENSG00000181852	-0.330713	6.80808	0.00767177
SARAF	ENSG00000133872	-0.3302	8.61577	0.00786723
FSD1L	ENSG00000106701	0.623307	2.52673	0.00788351
SPRYD7	ENSG00000123178	-0.481046	4.50176	0.00791061
GNB4	ENSG00000114450	-0.83357	4.07719	0.00791376
BMF	ENSG00000104081	0.563615	3.90525	0.00801058
GUSBP3	ENSG00000253203	0.790648	3.05319	0.00806412
AGO4	ENSG00000134698	0.533731	4.81557	0.00845163
NATD1	ENSG00000274180	0.849282	2.20904	0.00849782
GLUD1	ENSG00000148672	-0.316744	6.82163	0.00864721
SLC6A16	ENSG00000063127	1.25821	1.42332	0.00865529
SUSD6	ENSG00000100647	0.543408	5.2634	0.00880308
GPR63	ENSG00000112218	0.567002	4.24961	0.00883682
SPCS3	ENSG00000129128	-0.359057	6.98947	0.00884429
SESTD1	ENSG00000187231	0.501672	3.67834	0.00890023
AJUBA	ENSG00000129474	0.491653	4.91573	0.00900483
C1QTNF3	ENSG00000082196	0.951994	1.85596	0.00903991
DEFB132	ENSG00000186458	-0.693305	3.20748	0.00925219
NTNG1	ENSG00000162631	-0.961131	0.885165	0.00939801
TTC5	ENSG00000136319	-0.43793	4.55276	0.00942481
TULP4	ENSG00000130338	0.802195	5.51055	0.00942481
BAZ2B	ENSG00000123636	0.680364	2.71585	0.00944421
SEC11C	ENSG00000166562	-0.44289	7.33833	0.00947661
MEX3A	ENSG00000254726	0.669282	3.45078	0.00952276
SESN3	ENSG00000149212	0.665044	6.34645	0.0095472
DUSP16	ENSG00000111266	0.416716	6.36903	0.00961479
DPY19L1	ENSG00000173852	0.728279	3.19045	0.00961936
PER1	ENSG00000179094	-0.845219	3.62428	0.0096965
IFT57	ENSG00000114446	-0.454257	6.22427	0.00978778
FAM84A	ENSG00000162981	1.41282	0.638105	0.00998377
ATXN1	ENSG00000124788	0.586088	4.53002	0.0103485
ADPRM	ENSG00000170222	-0.60874	2.69831	0.0107053
TWISTNB	ENSG00000105849	-0.525677	5.36285	0.0107053
ANTXR1	ENSG00000169604	0.623766	3.86865	0.010724
FGF13	ENSG00000129682	0.89633	2.5051	0.0108124
LINC01133	ENSG00000224259	0.569196	4.1453	0.0108357
KDM6A	ENSG00000147050	0.539627	7.29125	0.0108481
CYP2U1	ENSG00000155016	-0.505198	4.00403	0.0108571
ANKS1B	ENSG00000185046	0.847098	1.44499	0.0108599
TFAP2A	ENSG00000137203	0.60097	3.5163	0.0111551
GCG	ENSG00000115263	0.939686	3.16151	0.0112841
PHC1	ENSG00000111752	0.637352	4.41757	0.0113796
REPS2	ENSG00000169891	-0.537139	4.73638	0.0115663
LGALS8	ENSG00000116977	0.499841	7.05961	0.0115663
POU5F1	ENSG00000204531	1.12957	1.27052	0.0115898
NT5DC3	ENSG00000111696	-0.48517	4.64415	0.0117285
KALRN	ENSG00000160145	1.31597	1.23029	0.01183
PCDH11Y	ENSG00000099715	1.00755	2.30976	0.0119618
C1ORF21	ENSG00000116667	-0.350003	5.9329	0.0119851
SLBP	ENSG00000163950	-0.323443	7.13297	0.0120458
BTN2A2	ENSG00000124508	0.565086	3.62269	0.0121765
EGLN1	ENSG00000135766	0.342902	5.7045	0.0124223
CAMKK2	ENSG00000110931	-0.352309	6.13682	0.0125123
RP11-497H16.5	ENSG00000196302	0.813219	2.03653	0.0125432
RP11-1319K7.1	ENSG00000179978	0.953331	3.10634	0.0125432
MAST4	ENSG00000069020	0.5698	4.68268	0.0126538
EFHC2	ENSG00000183690	0.883457	2.37678	0.0128727
ADPGK	ENSG00000159322	-0.331263	5.81983	0.0132181
RP11-1081M5.2	ENSG00000260484	1.11813	1.20225	0.0137006
HSPA5	ENSG00000044574	-0.320043	10.2768	0.0137489
AL354822.1	ENSG00000278384	0.823577	4.07234	0.013982
LINC00680	ENSG00000215190	0.602445	3.47185	0.0147246
ACAT2	ENSG00000120437	-0.34957	7.09068	0.0149446
NCOA3	ENSG00000124151	0.654017	4.9769	0.0149446
PDIA4	ENSG00000155660	-0.367322	8.62109	0.0152328
DUSP27	ENSG00000198842	-0.945283	1.54476	0.0154113
PAN3	ENSG00000152520	0.682582	4.61447	0.0156092
GPC5-AS1	ENSG00000235984	-1.00015	2.07577	0.0159039
CRTC3	ENSG00000140577	0.465027	4.54254	0.0161182
BBS4	ENSG00000140463	-0.405742	5.22338	0.0161525
RERE	ENSG00000142599	0.52181	5.38657	0.0162637
CMC2	ENSG00000103121	-0.429584	6.4505	0.0163139
TRIM36	ENSG00000152503	-0.701083	4.36282	0.0164617
MRPL32	ENSG00000106591	-0.403175	6.51334	0.016493
SLC2A12	ENSG00000146411	-0.569504	4.55512	0.0165366
PLA2G2A	ENSG00000188257	0.588222	4.53752	0.0166412
NVL	ENSG00000143748	-0.335094	6.40888	0.0169772
ACTR3	ENSG00000115091	-0.333368	7.46323	0.0169829
PKP4	ENSG00000144283	0.344772	6.588	0.0172583
KLK15	ENSG00000174562	-1.1934	0.843993	0.0173502
LEF1	ENSG00000138795	0.672895	2.39887	0.017521
PIGH	ENSG00000100564	-0.567166	5.11535	0.0175513
ABCG1	ENSG00000160179	0.641516	4.18732	0.0175513
C12ORF65	ENSG00000130921	-0.451637	4.81666	0.0179907
GATS	ENSG00000239521	0.554513	3.33113	0.0181628
ACKR3	ENSG00000144476	0.363035	6.60941	0.0203289
PRKD1	ENSG00000184304	0.357662	7.70908	0.0206526
CCDC80	ENSG00000091986	1.18787	1.08519	0.0207428
LUZP2	ENSG00000187398	0.411011	6.23577	0.0207428
GOLGA6L10	ENSG00000278662	0.708851	2.61238	0.0209093
ARHGEF2	ENSG00000116584	0.516659	5.12688	0.0213115
MMP16	ENSG00000156103	0.599421	6.19283	0.0213995
GALNT10	ENSG00000164574	0.372743	6.08086	0.0218712
FAM103A1	ENSG00000169612	-0.453922	4.88324	0.0219493
SPAG5-AS1	ENSG00000227543	0.95013	0.493577	0.0219493
GALNT18	ENSG00000110328	0.504465	4.69557	0.0224697
ZC3H12A	ENSG00000163874	0.586256	4.6124	0.022563
CA12	ENSG00000074410	0.459604	4.95945	0.0227106
PARP8	ENSG00000151883	0.534868	4.26846	0.0227287
SLC12A2	ENSG00000064651	0.505622	6.21083	0.0228283
RP11-589F5.4	ENSG00000253366	0.770693	2.10992	0.0230956
RP3-368A4.5	ENSG00000271430	0.73479	2.82384	0.0231141
RP11-403I13.8	ENSG00000272419	-0.462912	4.35923	0.0236992
FMNL3	ENSG00000161791	0.921926	1.59798	0.0241383
PDZD2	ENSG00000133401	0.981426	1.75089	0.0242449
RCAN3	ENSG00000117602	0.334513	5.65421	0.0242979
STXBP5L	ENSG00000145087	0.48884	6.4876	0.0243214
CALU	ENSG00000128595	-0.358624	7.05063	0.0243214
STARD3NL	ENSG00000010270	-0.416828	5.18092	0.0244525
EXPH5	ENSG00000110723	0.54781	5.16498	0.0249086
MALT1	ENSG00000172175	-0.530903	5.39479	0.0256001
TMEM109	ENSG00000110108	-0.404501	7.06835	0.0256127
BICD2	ENSG00000185963	-0.44265	5.02091	0.0259511
TP53TG1	ENSG00000182165	-0.59881	4.84515	0.0260269
KCTD1	ENSG00000134504	0.467702	3.67054	0.0260478
SERINC3	ENSG00000132824	0.334323	7.6675	0.026414
PTPRB	ENSG00000127329	1.3496	1.45695	0.0267926
UBTFL9	ENSG00000254567	1.55411	0.261849	0.0269564
RASSF5	ENSG00000266094	0.450855	4.07388	0.0271343
TBXAS1	ENSG00000059377	-0.48631	3.05159	0.0271343
MANF	ENSG00000145050	-0.492523	7.42926	0.0284661
NIPSNAP3B	ENSG00000165028	0.889723	1.58307	0.0285623
ELP2	ENSG00000134759	-0.30845	6.44768	0.0289568
TRIM13	ENSG00000204977	-0.378904	4.20936	0.0290334
RP11-1415C14.4	ENSG00000254701	0.776855	2.18317	0.0290334
DTNB	ENSG00000138101	0.355743	5.79524	0.0290334
ELP5	ENSG00000170291	-0.425492	5.53655	0.0290512
TNFRSF19	ENSG00000127863	-0.424221	4.48988	0.0290512
RP11-39H3.2	ENSG00000278965	-1.01164	0.704672	0.0290512
PIK3R3	ENSG00000117461	0.303492	6.68845	0.0291092
IGSF3	ENSG00000143061	0.646756	3.47439	0.0292203
ZWINT	ENSG00000122952	-0.302254	6.86823	0.0293863
MIR600HG	ENSG00000236901	0.609929	3.64771	0.0294015
NDFIP2	ENSG00000102471	-0.419633	5.63365	0.0294015
TMCC3	ENSG00000057704	-0.951708	1.0295	0.0297884
ZSCAN30	ENSG00000186814	0.565277	3.3268	0.0298007
C12ORF49	ENSG00000111412	0.303541	5.36104	0.0298007
WNT5A	ENSG00000114251	0.855532	1.86951	0.0298007
PNKD	ENSG00000127838	-0.527105	5.93288	0.0298007
CEBPD	ENSG00000221869	-0.893247	3.33401	0.029968
SAT1	ENSG00000130066	-0.422814	6.37146	0.029968
GATSL2	ENSG00000274070	0.782645	2.05582	0.029968
TIMP2	ENSG00000035862	0.407987	4.63204	0.029968
PHF12	ENSG00000109118	0.4172	7.09611	0.029968
WNK3	ENSG00000196632	0.604209	4.30168	0.029968
DAPK2	ENSG00000035664	0.49582	3.59886	0.0302945
LCP1	ENSG00000136167	-0.340677	7.57974	0.0303587
NEAT1	ENSG00000245532	0.563351	8.35506	0.0304778
INPP5J	ENSG00000185133	0.445888	4.22864	0.0304778
TMEM144	ENSG00000164124	0.46124	5.01815	0.0307491
RP11-1198D22.1	ENSG00000235558	0.710258	1.98082	0.0308529
ZFP36L1	ENSG00000185650	0.341922	5.24553	0.0315721
PDP1	ENSG00000164951	0.461574	3.95606	0.0318487
STC1	ENSG00000159167	1.42306	0.631202	0.0321099
PCYT2	ENSG00000185813	-0.469144	6.04897	0.0323846
AAED1	ENSG00000158122	-0.40318	3.77099	0.0324095
PSMD8	ENSG00000099341	-0.354477	8.00196	0.032739
SLC39A6	ENSG00000141424	-0.32497	7.8884	0.0327687
MYT1	ENSG00000196132	0.504406	3.39833	0.0336933
ARL2BP	ENSG00000102931	-0.366038	5.66299	0.0342529
PDIA6	ENSG00000143870	-0.267153	8.6279	0.0343079
BP-2189O9.2	ENSG00000278931	0.931933	2.71565	0.0343119
GRIK1	ENSG00000171189	0.616319	2.92601	0.0343715
RALGPS1	ENSG00000136828	0.526288	3.32264	0.0343715
SETD9	ENSG00000155542	-0.542689	2.74457	0.0343975
SPOCK1	ENSG00000152377	-1.09921	0.508364	0.0344042
FOXN3	ENSG00000053254	0.477789	5.56916	0.0344042
SLITRK3	ENSG00000121871	0.553162	5.60813	0.0344042
WWP2	ENSG00000198373	0.369552	6.54398	0.034598
GABBR1	ENSG00000204681	0.813756	2.72367	0.0346556
DBI	ENSG00000155368	-0.519536	7.93079	0.034868
MARVELD2	ENSG00000152939	0.327353	7.04848	0.034868
RP11-723O4.6	ENSG00000187695	1.25578	0.586636	0.034868
GOLGA6L3	ENSG00000188388	1.03759	0.606917	0.0350278
QSOX1	ENSG00000116260	0.43516	7.12366	0.0350278
KMT2C	ENSG00000055609	0.663221	5.88942	0.0350278
SPTAN1	ENSG00000197694	0.34684	7.07268	0.0350278
AC005154.6	ENSG00000196295	0.394359	4.22216	0.0362185
ZC3H6	ENSG00000188177	0.781017	2.19829	0.0363239
SLC41A2	ENSG00000136052	0.628683	3.13283	0.0364308
DHRS7	ENSG00000100612	-0.337818	8.38107	0.0364308
KIF22	ENSG00000079616	-0.358339	7.02207	0.0364308
FDFT1	ENSG00000079459	-0.306501	8.51487	0.0367195
ZNF697	ENSG00000143067	-0.565717	2.643	0.0374439
APOL3	ENSG00000128284	0.995286	1.01603	0.037918
GLIPR2	ENSG00000122694	-0.443021	4.22321	0.03816
NAAA	ENSG00000138744	-0.307078	6.33252	0.0384681
IDI1	ENSG00000067064	-0.356281	7.1306	0.0384681
BCCIP	ENSG00000107949	-0.323965	7.23007	0.0384681
NXPE3	ENSG00000144815	-0.42328	5.13845	0.0384788
FIGNL1	ENSG00000132436	0.398567	6.28523	0.0396098
RALB	ENSG00000144118	0.331739	5.6384	0.0396098
NPC1	ENSG00000141458	-0.284699	6.2799	0.0396794
RP11-98J23.2	ENSG00000198237	0.670966	2.23199	0.0398245
PAK2	ENSG00000180370	0.335349	7.37333	0.0398327
CLSTN3	ENSG00000139182	0.511629	4.8966	0.0398327
PLEKHB2	ENSG00000115762	-0.286799	7.42273	0.0404403
BTD	ENSG00000169814	0.346553	4.74166	0.0404403
SLC25A19	ENSG00000125454	-0.364636	4.97123	0.0404403
SMPD4	ENSG00000136699	-0.32055	7.05353	0.0405278
YPEL1	ENSG00000100027	0.591834	2.60495	0.0407234
PPFIBP1	ENSG00000110841	-0.402502	5.45011	0.0408222
MAPRE2	ENSG00000166974	0.410374	4.91407	0.0409723
IL36RN	ENSG00000136695	0.800313	1.50546	0.0409723
ZFP36L2	ENSG00000152518	0.330164	4.83353	0.0415129
SCNN1G	ENSG00000166828	1.13945	0.984664	0.0420385
AP000432.1	ENSG00000280594	0.938833	0.445342	0.0420385
ARHGEF37	ENSG00000183111	0.315113	4.95367	0.0422838
ADGRV1	ENSG00000164199	0.672854	4.26948	0.0426239
NWD1	ENSG00000188039	0.919334	1.41478	0.0427769
RP11-61N20.3	ENSG00000226268	-0.45095	3.81743	0.0427769
MANEA	ENSG00000172469	0.581975	6.55335	0.0435134
SLC19A2	ENSG00000117479	-0.348164	5.98133	0.0435134
ST8SIA4	ENSG00000113532	0.784813	1.24262	0.0435134
NR2F1	ENSG00000175745	0.995515	0.570884	0.0435134
UBE2FP1	ENSG00000224080	-0.996204	-0.0583859	0.0435134
STRBP	ENSG00000165209	0.342353	6.74872	0.0435134
DPYSL2	ENSG00000092964	0.364605	5.07975	0.0435134
RTN4RL1	ENSG00000185924	0.835184	2.86932	0.0436344
HSP90B1	ENSG00000166598	-0.340462	10.5033	0.0438731
ABCC5	ENSG00000114770	0.496197	5.79163	0.0438731
SLC9A7	ENSG00000065923	0.400575	6.31563	0.0441369
C5ORF30	ENSG00000181751	0.381125	5.70071	0.0443548
KCNS3	ENSG00000170745	0.519922	3.34546	0.0443548
FBXL7	ENSG00000183580	0.760241	2.00526	0.0446528
SLC20A2	ENSG00000168575	0.386358	5.32748	0.0446595
NANS	ENSG00000095380	-0.373373	7.35587	0.0448431
ZBED3	ENSG00000132846	0.475467	5.56943	0.0448431
WDFY3	ENSG00000163625	0.615771	5.76992	0.0454091
CRYM	ENSG00000103316	-0.749893	1.21259	0.0454334
CD24	ENSG00000272398	0.504428	3.70913	0.0455209
LYAR	ENSG00000145220	-0.386933	5.50808	0.0458614
FAR2P1	ENSG00000180178	-0.637399	3.06644	0.0458614
KDM3A	ENSG00000115548	0.369251	4.50608	0.0462944
LINC01137	ENSG00000233621	0.546829	3.53729	0.0462944
RP11-763B22.3	ENSG00000233586	-1.28642	-0.0296874	0.0462944
GLI3	ENSG00000106571	0.69883	2.57054	0.0467011
HECTD2	ENSG00000165338	0.557443	4.8754	0.0467942
DRAIC	ENSG00000245750	0.356616	4.57666	0.0471326
AC009404.2	ENSG00000236255	0.717143	2.08138	0.0472292
IRS2	ENSG00000185950	-0.858194	1.46679	0.0472526
ST3GAL1	ENSG00000008513	0.389543	8.70874	0.0472526
GPD1L	ENSG00000152642	-0.398698	5.21101	0.0476374
NUDT15	ENSG00000136159	-0.309212	5.34277	0.0479573
RNF207	ENSG00000158286	0.686219	2.67176	0.0479739
TEX2	ENSG00000136478	-0.399132	6.30294	0.0479797
P4HA2	ENSG00000072682	0.351348	4.37285	0.0479951
GCNT1	ENSG00000187210	-0.322405	5.25032	0.0479951
SMCO4	ENSG00000166002	-0.534583	6.1979	0.0483022
ARHGAP29	ENSG00000137962	0.520089	6.18802	0.0486753
MPHOSPH9	ENSG00000051825	-0.44465	5.92769	0.0486753
MCTP1	ENSG00000175471	0.774407	2.24568	0.0486753
ATP11A	ENSG00000068650	0.562557	6.82529	0.0491062
TMEM56	ENSG00000152078	0.563645	3.62165	0.0493918
FAM231D	ENSG00000272058	-0.409469	3.17417	0.0493918
DUXAP8	ENSG00000206195	-0.336429	5.97029	0.0493918
WWC1	ENSG00000113645	-0.289837	6.5801	0.0493918
RP11-353N14.2	ENSG00000262772	0.887603	0.692214	0.0496066
STRADA	ENSG00000266173	0.594594	1.82976	0.0496066
NFKBIA	ENSG00000100906	-0.356023	5.63099	0.0496066
LPCAT3	ENSG00000111684	0.268432	6.95034	0.0496893

## Sheet: siAR vs Enz
Symbol	Ensembl Gene ID	logFC	logCPM	FDR
PGD	ENSG00000142657	1.8342	8.16978	4.44464e-10
YWHAH	ENSG00000128245	-1.69669	6.18766	4.31701e-08
AR	ENSG00000169083	2.66991	8.07827	5.99123e-08
NUDT15	ENSG00000136159	-1.59915	5.34277	1.19796e-07
EMP2	ENSG00000213853	-1.73255	5.41114	1.19796e-07
STEAP3	ENSG00000115107	-2.16268	4.13525	3.62738e-07
HMMR	ENSG00000072571	1.94665	6.80503	5.47823e-07
GDF11	ENSG00000135414	-1.63891	4.682	7.10944e-07
TMEM41B	ENSG00000166471	1.3345	6.07814	1.31298e-06
TOP1MT	ENSG00000184428	-1.68526	5.01632	1.49003e-06
DENND6A	ENSG00000174839	1.82599	4.97808	1.49003e-06
JOSD1	ENSG00000100221	1.18321	5.9137	5.9006e-06
THG1L	ENSG00000113272	-1.77089	3.63847	6.25831e-06
LSM14A	ENSG00000257103	-1.19561	7.06201	6.25831e-06
SYS1	ENSG00000204070	-1.55888	5.11716	6.25831e-06
TLN1	ENSG00000137076	-1.41637	6.9485	6.6416e-06
NREP	ENSG00000134986	1.22283	6.03668	7.26083e-06
OPRK1	ENSG00000082556	-1.4715	4.14327	9.28644e-06
GRIK1	ENSG00000171189	-2.31741	2.92601	9.28644e-06
METTL16	ENSG00000127804	-1.09212	5.98522	9.28644e-06
CHPF	ENSG00000123989	-2.24457	6.3044	1.26468e-05
TPM4	ENSG00000167460	1.02775	6.53877	1.27152e-05
CPNE2	ENSG00000140848	-1.60149	3.41042	1.41831e-05
VPS37A	ENSG00000155975	1.51228	5.54807	1.41831e-05
GNB1	ENSG00000078369	-0.844105	8.81427	1.41831e-05
GHR	ENSG00000112964	1.64745	4.16608	1.41831e-05
TMEM50B	ENSG00000142188	-1.1193	5.64933	1.4901e-05
FAM98A	ENSG00000119812	1.58553	5.74817	2.0598e-05
ICMT	ENSG00000116237	-0.827697	7.07838	2.0598e-05
SNU13	ENSG00000100138	1.33472	7.64024	2.0598e-05
NDN	ENSG00000182636	-1.57269	4.92641	2.53933e-05
ATPAF1	ENSG00000123472	-0.929175	7.35536	2.63265e-05
LAMP2	ENSG00000005893	-0.976174	7.80568	3.19077e-05
MFSD6	ENSG00000151690	-1.07457	4.65461	3.42674e-05
DHX40	ENSG00000108406	-1.09553	5.79208	3.44864e-05
TAOK3	ENSG00000135090	1.39364	5.59155	3.67932e-05
F2R	ENSG00000181104	-1.60351	3.79702	3.94261e-05
MED28	ENSG00000118579	-0.91911	6.01781	4.06812e-05
SAMD4B	ENSG00000179134	1.1685	6.33577	4.06812e-05
GBAS	ENSG00000146729	1.01881	6.58298	4.06812e-05
SPIN1	ENSG00000106723	1.01467	6.28202	4.06812e-05
PLA2G2A	ENSG00000188257	-1.52484	4.53752	4.51021e-05
UBE2E3	ENSG00000170035	1.03363	5.79354	6.39977e-05
MTHFD2	ENSG00000065911	0.809404	7.34355	6.55854e-05
GFM1	ENSG00000168827	0.88465	6.77504	6.55854e-05
SAR1B	ENSG00000152700	-0.891279	7.03901	6.55854e-05
ANO10	ENSG00000160746	-1.18228	4.73163	6.55854e-05
TTF2	ENSG00000116830	1.26562	5.67726	6.55854e-05
SCAMP1	ENSG00000085365	-1.24033	6.04492	6.55854e-05
DNMT1	ENSG00000130816	-0.894531	7.55034	6.88194e-05
TMEM2	ENSG00000135048	1.0124	5.21324	6.93512e-05
PXYLP1	ENSG00000155893	-1.89482	2.17359	7.54184e-05
SLC39A6	ENSG00000141424	0.919105	7.8884	7.95858e-05
SNAP23	ENSG00000092531	1.2282	5.51035	8.90075e-05
RTF1	ENSG00000137815	-0.928161	6.48322	0.000105213
COX11	ENSG00000166260	0.842475	5.64722	0.000105213
MPZL3	ENSG00000160588	1.12585	5.10625	0.000116842
NT5DC2	ENSG00000168268	-1.0533	7.61715	0.000119615
CRKL	ENSG00000099942	0.851823	6.19369	0.000143089
SLC41A1	ENSG00000133065	-1.12889	5.60766	0.000144722
SGPL1	ENSG00000166224	0.982366	6.55672	0.00017381
ATP1B1	ENSG00000143153	-0.751123	9.23055	0.000216486
TMX3	ENSG00000166479	1.20715	5.28247	0.000226483
CITED2	ENSG00000164442	-0.752169	6.1963	0.000300784
PMEPA1	ENSG00000124225	-0.775019	5.76215	0.000300784
POLR3E	ENSG00000058600	-0.880595	5.79407	0.000300784
KIAA0100	ENSG00000007202	-0.958459	8.38993	0.000313097
RDH10	ENSG00000121039	0.781803	6.06429	0.000321193
KLHL28	ENSG00000179454	1.55408	4.5838	0.000321193
TMTC3	ENSG00000139324	1.42092	5.25968	0.000340838
TWF1	ENSG00000151239	1.50037	7.04476	0.000349435
RNPS1	ENSG00000205937	-0.859009	7.99739	0.000400118
ERH	ENSG00000100632	0.940737	7.91649	0.000425418
SS18	ENSG00000141380	-0.745057	6.0491	0.000425418
ALCAM	ENSG00000170017	-1.13839	6.33367	0.000433796
MYB	ENSG00000118513	-1.29061	3.58851	0.000433796
SSH2	ENSG00000141298	0.887263	4.4566	0.000466643
COLEC12	ENSG00000158270	-0.762343	6.15312	0.000497683
ZNF551	ENSG00000204519	1.26581	3.71669	0.00068259
SSFA2	ENSG00000138434	0.921127	6.59958	0.000726371
UBE2G2	ENSG00000184787	-0.675319	7.20153	0.000761694
ERLIN1	ENSG00000107566	0.947915	4.41139	0.000823612
LNPEP	ENSG00000113441	1.13085	5.76969	0.000828981
UGT2B17	ENSG00000197888	1.07971	7.23028	0.000858884
LRRC20	ENSG00000172731	-0.892331	6.13412	0.000863809
SLC7A2	ENSG00000003989	-1.06725	5.45523	0.000863809
WHAMM	ENSG00000156232	-0.813725	4.00437	0.000863809
VGLL4	ENSG00000144560	-0.945648	6.28885	0.000887836
RAPGEF2	ENSG00000109756	1.54059	4.33076	0.000964577
THRB	ENSG00000151090	0.97724	5.141	0.00113451
SGTA	ENSG00000104969	-0.802673	7.49699	0.00124191
ERMP1	ENSG00000099219	-0.909057	5.18082	0.00129024
NOL9	ENSG00000162408	0.660396	6.13093	0.00129381
PDE12	ENSG00000174840	0.744923	6.03663	0.00135611
SESN1	ENSG00000080546	-0.709302	6.90205	0.00139871
EVI5	ENSG00000067208	1.07479	4.52122	0.0014082
PRC1	ENSG00000198901	-0.678295	6.87179	0.00140998
TWF1P1	ENSG00000178082	1.55365	2.50919	0.00144973
AGR2	ENSG00000106541	1.96676	2.44519	0.00144973
AIDA	ENSG00000186063	-1.03063	8.78486	0.00152034
S1PR3	ENSG00000213694	-1.552	2.36327	0.00152034
CDKN1A	ENSG00000124762	0.826266	6.94083	0.00152034
AGO4	ENSG00000134698	-0.966551	4.81557	0.00152034
RSPRY1	ENSG00000159579	-0.959746	5.48944	0.00152034
SLC19A2	ENSG00000117479	0.793225	5.98133	0.00152034
GNAI1	ENSG00000127955	0.90899	4.65615	0.00155366
USP43	ENSG00000154914	-0.782937	4.42679	0.00161309
SEPT5	ENSG00000184702	-0.973873	5.68515	0.00162209
HNRNPD	ENSG00000138668	-0.701987	8.33079	0.00169774
PIGZ	ENSG00000119227	-1.67709	1.56741	0.00171844
CTD-2562J17.6	ENSG00000279117	-0.693277	4.36197	0.00174111
GLO1	ENSG00000124767	-0.793319	8.07196	0.0019422
ZBTB5	ENSG00000168795	0.821221	5.03694	0.0019422
FAM84B	ENSG00000168672	0.702863	6.46506	0.00207976
ZCCHC3	ENSG00000247315	-0.750181	4.76674	0.00214696
MT1F	ENSG00000198417	-1.47195	4.19389	0.00234737
FHOD3	ENSG00000134775	-0.910869	3.15048	0.00269299
LGI2	ENSG00000153012	-1.02007	2.95535	0.00272222
SFT2D3	ENSG00000173349	-0.755294	4.18724	0.00272222
MAPK6	ENSG00000069956	0.988783	7.09069	0.00289944
EHBP1L1	ENSG00000173442	-1.34771	2.83661	0.00289944
XRN1	ENSG00000114127	1.31013	5.42349	0.00309724
TOMM34	ENSG00000025772	-0.669243	6.67396	0.00309779
TMEM65	ENSG00000164983	0.953552	4.85644	0.00315137
KCNMA1	ENSG00000156113	0.636023	5.92349	0.00315137
LMAN1	ENSG00000074695	0.825657	7.42219	0.00320529
SDHC	ENSG00000143252	0.63148	7.25093	0.00320529
EPHB2	ENSG00000133216	-1.20954	2.60781	0.00327304
MRPL50	ENSG00000136897	0.98276	5.58094	0.00327995
CBX6	ENSG00000183741	1.34286	7.77252	0.00334544
GLI3	ENSG00000106571	1.51164	2.57054	0.0033539
LMBRD1	ENSG00000168216	0.820763	4.67321	0.0033539
ALDH9A1	ENSG00000143149	-0.545253	7.09209	0.00338578
PRPF3	ENSG00000117360	-0.705845	5.905	0.00338578
DNAJC24	ENSG00000170946	1.29989	2.77613	0.00338578
CDKL5	ENSG00000008086	1.84875	2.43393	0.0035092
FOXO3	ENSG00000118689	-0.842905	6.86995	0.0035092
KAT5	ENSG00000172977	-0.700638	5.46796	0.00353071
THAP7-AS1	ENSG00000230513	-1.05891	3.96164	0.00353481
MALL	ENSG00000144063	0.811536	4.1253	0.00353481
RING1	ENSG00000204227	-0.694547	5.29041	0.00353481
BTN3A2	ENSG00000186470	1.01496	3.36932	0.00353481
TBRG1	ENSG00000154144	-0.58665	7.0148	0.00367657
IL10RB	ENSG00000243646	-1.38545	2.987	0.00367657
CCNA2	ENSG00000145386	0.642354	6.18892	0.00370268
RMDN3	ENSG00000137824	-0.639325	5.55347	0.00375943
GLCE	ENSG00000138604	-0.959371	3.86796	0.00375943
INPP4B	ENSG00000109452	1.12787	3.22569	0.00375943
CLIC4	ENSG00000169504	-0.923659	6.23204	0.00375943
DHFR2	ENSG00000178700	0.834605	3.90725	0.00392428
EIF3F	ENSG00000175390	-0.686503	7.70544	0.00415601
GPR75	ENSG00000119737	2.48878	0.934499	0.00418506
FGD1	ENSG00000102302	-1.30977	1.48446	0.00422898
UBE2W	ENSG00000104343	0.723874	4.86877	0.00422898
HOOK1	ENSG00000134709	0.872807	5.80754	0.00429033
SIPA1L2	ENSG00000116991	0.857037	5.04698	0.00429033
CCDC125	ENSG00000183323	0.685992	5.42877	0.00430255
FAM216A	ENSG00000204856	-0.640258	5.58783	0.00431509
EHD3	ENSG00000013016	-0.825843	4.18141	0.0043895
CREBRF	ENSG00000164463	1.18405	2.51999	0.0043895
UCK1	ENSG00000130717	-0.765274	5.4194	0.0043895
SCD5	ENSG00000145284	-0.757711	4.48115	0.00446833
RPS6KA2	ENSG00000071242	0.855901	5.74501	0.00446833
GPD2	ENSG00000115159	0.860051	5.95729	0.00453006
LPCAT1	ENSG00000153395	-0.559426	6.87001	0.00462982
CD164	ENSG00000135535	0.727509	7.99166	0.00462982
MIR4453	ENSG00000268471	1.1302	3.79283	0.00464328
GAS6-AS1	ENSG00000233695	1.08653	3.78471	0.00470241
ACBD3	ENSG00000182827	-0.624994	5.93604	0.00472048
PRKAA1	ENSG00000132356	0.869692	7.33725	0.00472048
ZMYND10	ENSG00000004838	-1.49627	1.5923	0.00473363
HS6ST1	ENSG00000136720	-0.905033	5.56206	0.00490533
MTMR9	ENSG00000104643	0.923218	5.2629	0.00507447
SEPT3	ENSG00000100167	-0.730301	5.5673	0.00507447
ELF4	ENSG00000102034	-1.13282	2.34525	0.00532677
DENND1B	ENSG00000213047	1.11159	4.9491	0.00545139
TK2	ENSG00000166548	-0.684284	5.15897	0.0058855
PCNX2	ENSG00000135749	0.678195	5.3594	0.0058855
TMEM184B	ENSG00000198792	-0.830491	6.0103	0.0058855
NIPA1	ENSG00000170113	0.653388	5.24864	0.0058855
COL6A2	ENSG00000142173	-0.81869	4.69046	0.0058855
RCAN3	ENSG00000117602	-0.587581	5.65421	0.0058855
SLC16A14	ENSG00000163053	0.805726	5.12415	0.0058855
YPEL5	ENSG00000119801	-0.693678	4.37892	0.0058855
DCUN1D3	ENSG00000188215	0.943638	3.79828	0.0058855
CIPC	ENSG00000198894	-0.720288	5.41836	0.00601549
GRB10	ENSG00000106070	-0.529035	8.24043	0.00603149
SHCBP1	ENSG00000171241	0.564326	6.0135	0.00603149
SLC22A10	ENSG00000184999	-0.925899	3.11252	0.00631887
AOC2	ENSG00000131480	0.865275	3.42177	0.00631887
TAF9B	ENSG00000187325	0.759645	5.86437	0.00636627
POLD3	ENSG00000077514	-0.644631	4.73454	0.00651237
KLK3	ENSG00000142515	-0.843511	8.07693	0.00670538
ULK3	ENSG00000140474	0.918213	5.6058	0.00678453
RBBP7	ENSG00000102054	0.539317	7.01758	0.00678453
DCBLD2	ENSG00000057019	-0.838786	3.66596	0.00678453
TMEFF2	ENSG00000144339	-0.563062	7.4617	0.007298
ACKR3	ENSG00000144476	-0.597481	6.60941	0.00730017
C5ORF22	ENSG00000082213	0.790909	5.64792	0.00735909
ZFYVE9	ENSG00000157077	-0.856653	4.94022	0.00741625
MBP	ENSG00000197971	0.761101	5.68722	0.00753922
MEIS1	ENSG00000143995	1.08256	2.24776	0.00753922
UBE2E2	ENSG00000182247	-0.551739	5.33443	0.00753922
IL6ST	ENSG00000134352	-1.14233	5.83581	0.00753922
MAPK3	ENSG00000102882	-0.602097	5.54056	0.00770424
ARHGEF26	ENSG00000114790	0.640098	7.49822	0.00772333
MAPK8	ENSG00000107643	0.64756	5.1197	0.00791404
LIN7A	ENSG00000111052	1.28433	2.554	0.00794871
CORO2A	ENSG00000106789	0.633745	4.82273	0.00794871
TRIM14	ENSG00000106785	0.595076	5.84254	0.00794871
GLUL	ENSG00000135821	-0.435634	7.33203	0.00801147
PTBP3	ENSG00000119314	-0.709204	5.8679	0.00801147
B4GAT1	ENSG00000174684	-0.825824	5.08088	0.00804663
RP11-115D19.1	ENSG00000251095	1.32676	2.29949	0.00812284
GPER1	ENSG00000164850	-0.762144	4.49978	0.00817502
MAPRE1	ENSG00000101367	-0.450314	7.52561	0.00817502
CTNNA1	ENSG00000044115	0.485764	8.14775	0.00818373
PAM	ENSG00000145730	-1.13157	1.81442	0.00820921
ARNT	ENSG00000143437	0.817442	5.52647	0.00828835
RP11-378J18.8	ENSG00000272750	-1.32421	1.4285	0.00828835
CD24	ENSG00000272398	-0.929731	3.70913	0.00833367
OACYLP	ENSG00000224367	1.27355	2.40784	0.00855231
DDX41	ENSG00000183258	-0.527805	6.62265	0.00859282
PLCD3	ENSG00000161714	-0.874874	3.37266	0.00870867
TMPRSS11E	ENSG00000087128	1.53553	1.40792	0.00882123
RP11-629O1.2	ENSG00000261220	-0.913611	3.3289	0.00882123
TNRC6A	ENSG00000090905	-0.907997	6.35061	0.00882123
MRPS6	ENSG00000243927	-0.864693	5.05349	0.00889839
RBP7	ENSG00000162444	-1.3382	1.70257	0.00897104
SMAD9	ENSG00000120693	0.657022	4.76518	0.00897104
PGRMC2	ENSG00000164040	-0.620504	6.36444	0.00904872
FBXO38	ENSG00000145868	0.862512	4.98235	0.00929397
IAH1	ENSG00000134330	-0.670474	4.90101	0.00929397
TDP1	ENSG00000042088	-0.531194	5.70224	0.00929397
RBM15B	ENSG00000259956	-0.544629	7.21079	0.00929928
GTF2IP12	ENSG00000283050	1.45122	2.78412	0.00934548
TLE1	ENSG00000196781	0.617413	4.66268	0.00972191
PPAT	ENSG00000128059	0.643469	6.54668	0.00975421
ZFAND6	ENSG00000086666	-0.673428	5.7618	0.00975421
TRIM4	ENSG00000146833	-0.582975	5.45149	0.00979378
ZCCHC9	ENSG00000131732	0.762039	4.60759	0.0100956
BTN3A3	ENSG00000111801	0.711648	3.91914	0.0100956
TACC2	ENSG00000138162	-0.653111	6.28592	0.0100956
CORO1C	ENSG00000110880	-0.46638	6.25331	0.0101947
RAB6C-AS1	ENSG00000225449	-0.564512	5.13668	0.010258
ATF3	ENSG00000162772	0.733993	5.21369	0.0102872
CYP2U1	ENSG00000155016	-0.749632	4.00403	0.0102872
BAZ2B	ENSG00000123636	0.973765	2.71585	0.0105926
DIO1	ENSG00000211452	-0.89882	3.57367	0.0105926
AKAP8	ENSG00000105127	-0.537132	5.47158	0.0105926
SS18L1	ENSG00000184402	-0.703265	5.08215	0.0107803
CENPA	ENSG00000115163	0.960291	4.3757	0.0108793
RASSF4	ENSG00000107551	-1.19131	1.88082	0.010977
NUP50	ENSG00000093000	0.53983	6.75847	0.010977
CASP4	ENSG00000196954	0.960569	3.76819	0.0111363
GABRB3	ENSG00000166206	0.75829	5.52026	0.0111363
EIF4E3	ENSG00000163412	-1.13363	3.20222	0.0112513
SUCLG1	ENSG00000163541	-0.575293	6.46774	0.0119747
DSG2	ENSG00000046604	0.899102	7.39188	0.0119747
CAPNS1	ENSG00000126247	-0.604047	8.41222	0.012112
THUMPD1	ENSG00000066654	-0.671141	6.12562	0.0122154
SLC25A36	ENSG00000114120	0.74235	6.18514	0.0122154
BX004987.1	ENSG00000278704	1.06817	3.57785	0.0122154
NAALADL2	ENSG00000177694	0.915864	5.93361	0.0123063
TNFSF15	ENSG00000181634	0.811695	3.91642	0.0124429
GDPD5	ENSG00000158555	-1.69037	0.640765	0.0126937
DBT	ENSG00000137992	0.548041	7.02925	0.0127231
GLS	ENSG00000115419	0.568177	5.88583	0.0127231
ARHGEF3	ENSG00000163947	-1.46196	0.993783	0.0127231
NPC1	ENSG00000141458	0.486938	6.2799	0.0127231
BCL6	ENSG00000113916	0.735606	5.21009	0.0129087
MYCBP2	ENSG00000005810	1.02005	6.81133	0.0129087
DCP1A	ENSG00000272886	0.666962	5.29223	0.0129087
CSPG5	ENSG00000114646	-0.718381	4.56113	0.0130276
NDFIP2	ENSG00000102471	0.686243	5.63365	0.0130276
ST5	ENSG00000166444	-0.66872	4.20632	0.0130668
PLA2G16	ENSG00000176485	-0.74959	5.72691	0.0130668
MRAS	ENSG00000158186	-0.803438	3.14874	0.0133361
NEK7	ENSG00000151414	-0.872844	5.18543	0.0136717
SIKE1	ENSG00000052723	0.687653	5.65433	0.0136717
MFAP3	ENSG00000037749	1.0771	4.16411	0.0136717
TP53	ENSG00000141510	-0.614375	7.44191	0.013675
RAB14	ENSG00000119396	-0.578875	6.85223	0.013882
DOCK9	ENSG00000088387	-0.931159	4.63558	0.0141326
CYB5R4	ENSG00000065615	-0.88913	3.22639	0.0142631
PASK	ENSG00000115687	0.546779	5.88692	0.0142631
MAGEE1	ENSG00000198934	-0.659766	3.87673	0.0142631
VCX3B	ENSG00000205642	-1.53238	1.66868	0.0142631
RP1-198K11.5	ENSG00000275457	-1.52249	1.84992	0.0144317
GTF2IP13	ENSG00000272556	1.32212	3.71956	0.0146542
RIMS4	ENSG00000101098	-1.0877	2.77935	0.0146542
FAM46C	ENSG00000183508	1.252	2.72169	0.0146542
C16ORF71	ENSG00000166246	-1.32565	1.70477	0.0146542
BLZF1	ENSG00000117475	-0.761429	5.2325	0.0146542
ASS1	ENSG00000130707	-0.543983	5.65284	0.0148221
FOXD2-AS1	ENSG00000237424	-1.6821	0.7391	0.0148221
CCDC28A	ENSG00000024862	-0.940276	3.36174	0.0148221
CERS1	ENSG00000223802	-1.47016	1.67742	0.0148221
PLPP1	ENSG00000067113	-0.56348	6.78205	0.0148221
CTSH	ENSG00000103811	-0.588553	7.65449	0.0149103
TMEM254-AS1	ENSG00000230091	-0.953823	3.16798	0.0149818
FOSB	ENSG00000125740	-1.54715	0.308067	0.015015
FAM105A	ENSG00000145569	-0.83094	3.7533	0.015015
ABCG1	ENSG00000160179	-0.924875	4.18732	0.0150815
FBXW2	ENSG00000119402	0.645305	6.25484	0.0150815
LAPTM4B	ENSG00000104341	-0.645591	5.55941	0.0150815
RBM24	ENSG00000112183	-0.773258	3.87544	0.0150815
EFL1	ENSG00000140598	0.697056	4.81027	0.0156057
ADAM23	ENSG00000114948	-1.34272	1.36256	0.0156057
BIRC2	ENSG00000110330	0.70919	5.14056	0.0156057
ZNF587B	ENSG00000269343	0.688724	4.47531	0.0156057
AGPS	ENSG00000018510	0.703626	4.60777	0.0156057
CHIC1	ENSG00000204116	1.03836	3.90578	0.0156057
INIP	ENSG00000148153	0.591768	5.5704	0.0156057
CHMP5	ENSG00000086065	0.576358	5.75769	0.0156057
CECR1	ENSG00000093072	-1.01036	1.65871	0.0156403
TLR3	ENSG00000164342	1.66184	0.498115	0.0157573
KDM1A	ENSG00000004487	-0.428956	6.78939	0.0157573
TMEM159	ENSG00000011638	-0.786376	4.41849	0.0159598
CD59	ENSG00000085063	-0.605213	5.67523	0.0159767
METRNL	ENSG00000176845	-1.27869	1.92027	0.0160436
DDX3Y	ENSG00000067048	-0.606284	6.26002	0.0162564
ZBTB43	ENSG00000169155	0.575163	5.30872	0.0162564
RP11-419L20.2	ENSG00000254185	1.43362	1.12523	0.0162564
CAMLG	ENSG00000164615	-0.67853	5.04618	0.0162564
MYO1B	ENSG00000128641	0.784735	5.6684	0.0165088
MICAL2	ENSG00000133816	-0.847149	5.25355	0.0165227
SRRM2-AS1	ENSG00000205913	-0.877631	2.78253	0.0166598
LAMTOR3	ENSG00000109270	-0.599635	4.91877	0.0167597
ACO2	ENSG00000100412	-0.452536	7.80904	0.0167864
YES1	ENSG00000176105	-0.643541	6.12018	0.016801
TMEM59	ENSG00000116209	-0.503336	7.48106	0.016801
RPS6KA3	ENSG00000177189	0.878163	5.31149	0.0168757
RGS14	ENSG00000169220	-0.962663	3.65912	0.0169313
HADH	ENSG00000138796	-0.478263	6.37064	0.0171351
LRRC8E	ENSG00000171017	-0.695276	4.19431	0.0171351
TMPO	ENSG00000120802	0.534961	7.55591	0.0175176
COL5A2	ENSG00000204262	-1.05914	2.81417	0.0179749
NOX5	ENSG00000255346	1.20267	1.68765	0.0179749
HCG18	ENSG00000231074	0.596693	4.77159	0.0179749
IPO11	ENSG00000086200	-0.761239	5.06285	0.0180345
DDC	ENSG00000132437	-0.540054	7.57853	0.0180345
GRHL1	ENSG00000134317	0.601492	4.02	0.0182191
RAB15	ENSG00000139998	-0.597548	4.62102	0.0182191
DXO	ENSG00000204348	-0.746368	3.88236	0.0182911
SMIM7	ENSG00000214046	-0.534841	5.75242	0.0182911
FSD1L	ENSG00000106701	0.829811	2.52673	0.0183157
CTA-29F11.1	ENSG00000260708	-0.763923	3.78131	0.0183239
TTC28	ENSG00000100154	-1.1027	2.21787	0.0183657
FAS	ENSG00000026103	1.06008	2.75038	0.0186895
AC098614.2	ENSG00000213846	1.09949	1.81108	0.0187712
AKAP13	ENSG00000170776	0.901517	5.24185	0.0188729
KCNU1	ENSG00000215262	2.06478	1.46005	0.0190301
PIAS2	ENSG00000078043	-0.538931	5.57635	0.0190834
SNHG16	ENSG00000163597	0.426288	7.99471	0.0191573
HEXA	ENSG00000213614	-0.482601	4.94278	0.0198747
EIF4E2	ENSG00000135930	-0.478448	6.33402	0.0198747
ARL4C	ENSG00000188042	-1.33299	1.65915	0.0199961
ADSSL1	ENSG00000185100	-0.810676	3.35181	0.0199961
DSC2	ENSG00000134755	0.760452	5.23682	0.0200282
ARID1A	ENSG00000117713	0.699216	6.80024	0.0200282
KIF3B	ENSG00000101350	0.536762	6.93476	0.020149
FGFR1	ENSG00000077782	-0.732968	3.45819	0.020149
TPK1	ENSG00000196511	-0.962843	2.20821	0.0201798
SERPINE2	ENSG00000135919	-0.931287	2.36624	0.0204707
KLHDC10	ENSG00000128607	0.671551	5.31547	0.0207353
RAB27A	ENSG00000069974	-0.57536	4.33045	0.0207353
KIAA2022	ENSG00000050030	-1.98928	0.770807	0.0207514
LINC01278	ENSG00000235437	0.721498	6.24774	0.0210588
DAPK2	ENSG00000035664	-0.741935	3.59886	0.0211346
UBN2	ENSG00000157741	1.06627	5.08309	0.0213118
SMIM3	ENSG00000256235	-1.12701	1.68219	0.0213118
FTSJ1	ENSG00000068438	-0.552175	5.68346	0.0213118
SNN	ENSG00000184602	-0.606678	5.53243	0.0213118
TMEM230	ENSG00000089063	0.486171	7.05318	0.0213301
KANSL3	ENSG00000114982	0.549063	5.92645	0.0214471
SERF1B	ENSG00000205572	0.611609	5.54339	0.0214964
TMEM41A	ENSG00000163900	-0.48748	5.27787	0.0214964
TRIM5	ENSG00000132256	0.562801	5.25821	0.0217289
NEFL	ENSG00000277586	0.918059	2.83839	0.0217289
QKI	ENSG00000112531	-0.752202	5.10223	0.0217794
VEGFB	ENSG00000173511	-1.49499	1.39579	0.0217794
BET1	ENSG00000105829	-0.714533	4.46585	0.0217794
PINK1	ENSG00000158828	-0.673019	5.59736	0.0218267
TMEM158	ENSG00000249992	-1.42745	1.4988	0.0219454
PTGFRN	ENSG00000134247	-0.509208	6.56135	0.0219454
CACNA2D2	ENSG00000007402	-1.27355	2.13974	0.0219454
CDC27	ENSG00000004897	0.633228	6.17809	0.0219454
AC005077.14	ENSG00000230882	1.00193	3.56377	0.0222045
RFLNB	ENSG00000183688	-0.545839	5.38108	0.0227495
XPR1	ENSG00000143324	-0.741946	5.30298	0.0230412
PNMA6A	ENSG00000235961	-1.3508	2.78897	0.0232044
C18ORF8	ENSG00000141452	-0.456012	5.18744	0.0233083
TMEM229B	ENSG00000198133	-1.42171	1.71215	0.0233083
NDRG2	ENSG00000165795	-0.511218	5.75831	0.0234592
PROS1	ENSG00000184500	-1.63374	1.30791	0.0235293
ALYREF	ENSG00000183684	-0.807635	7.26754	0.0236317
RP11-384K6.6	ENSG00000260404	1.20731	3.19875	0.023635
MAP2	ENSG00000078018	0.752332	4.1162	0.023635
GALNT18	ENSG00000110328	-0.69988	4.69557	0.023635
MOAP1	ENSG00000165943	-0.448852	5.70532	0.023635
DUSP5	ENSG00000138166	-0.938771	2.08039	0.0237586
PARP9	ENSG00000138496	0.619327	4.80018	0.0237586
HIST1H4E	ENSG00000276966	-1.00097	2.25404	0.0237586
CIRBP-AS1	ENSG00000267493	-1.20829	2.51031	0.0237586
GSTCD	ENSG00000138780	0.74885	4.66429	0.0237586
RP11-14N7.2	ENSG00000232527	-0.941071	3.55681	0.0239132
SH2D4A	ENSG00000104611	0.433579	5.9008	0.0239132
PRKAR1B	ENSG00000188191	-0.776624	4.61434	0.0240461
LYSMD3	ENSG00000176018	0.937732	4.84375	0.0243927
ARHGAP28	ENSG00000088756	0.917685	4.16725	0.0249837
PRSS23	ENSG00000150687	0.832753	2.90854	0.025315
PARD6G	ENSG00000178184	-0.771082	3.126	0.025396
CCDC74A	ENSG00000163040	-0.760841	3.10899	0.025396
KCTD20	ENSG00000112078	0.564429	6.49262	0.0255997
TTC23L	ENSG00000205838	1.21259	1.28056	0.0258917
PTPN14	ENSG00000152104	1.08446	3.5266	0.0259489
ZNF75D	ENSG00000186376	-0.692915	4.0675	0.0259489
ACVR2B	ENSG00000114739	1.10945	2.72115	0.0261382
PTPN9	ENSG00000169410	-0.470949	5.01158	0.0262191
KIF5C	ENSG00000168280	-0.66523	5.52256	0.0262191
ZBED4	ENSG00000100426	-0.607115	5.80659	0.0262774
SORD	ENSG00000140263	0.389692	8.77094	0.0264081
ZNF812P	ENSG00000224689	1.35312	2.00089	0.0264081
ARG2	ENSG00000081181	-0.596177	7.13164	0.0270705
C9ORF152	ENSG00000188959	0.781704	3.50468	0.0270898
SPHK1	ENSG00000176170	-1.25758	1.52381	0.0270898
CKMT2-AS1	ENSG00000247572	0.877378	3.11341	0.0272567
TP53TG3	ENSG00000183632	-1.42111	0.680293	0.0277225
MED29	ENSG00000063322	-0.39767	6.90814	0.0281082
ZNF263	ENSG00000006194	-0.418095	5.54971	0.0281082
PLPP2	ENSG00000141934	-0.740997	5.82457	0.0285253
S1PR2	ENSG00000267534	-0.792986	2.45159	0.0285253
PDCD6	ENSG00000249915	-0.471627	6.68366	0.0285253
RP11-181C21.4	ENSG00000219201	-0.906522	2.57468	0.0289098
AKIRIN2	ENSG00000135334	0.642252	3.78283	0.0289326
IL17RD	ENSG00000144730	-0.991498	2.6319	0.0289798
ERCC6	ENSG00000225830	0.802902	4.49217	0.0289798
JAKMIP1	ENSG00000152969	-0.714361	3.82138	0.0291688
LINC01355	ENSG00000261326	1.40458	1.1618	0.0291688
PHIP	ENSG00000146247	0.865899	5.87435	0.0293281
FLVCR1	ENSG00000162769	0.548818	5.27064	0.0293281
TAS2R14	ENSG00000212127	2.51079	0.136942	0.0298013
SBNO1	ENSG00000139697	-0.661689	6.86589	0.0298013
FGFRL1	ENSG00000127418	-0.53664	7.55434	0.0301872
BTN3A1	ENSG00000026950	1.12319	2.60382	0.0301872
MCM10	ENSG00000065328	0.632559	5.73264	0.0304784
PAPD7	ENSG00000112941	0.4875	5.20723	0.0307819
ARHGEF25	ENSG00000240771	-1.23978	1.55487	0.0312384
NDUFAF4	ENSG00000123545	-0.591286	5.84277	0.0312384
PACS2	ENSG00000179364	-0.657803	5.8723	0.0312384
ADRA2A	ENSG00000150594	-0.655875	4.88882	0.0312633
FAM72B	ENSG00000188610	0.782903	3.98331	0.0313635
KIAA0040	ENSG00000235750	0.8129	2.84708	0.0313635
SMARCD3	ENSG00000082014	-0.672382	4.39489	0.0313635
ENO2	ENSG00000111674	-0.706932	4.28235	0.0316185
TSPY8	ENSG00000229549	-1.87432	0.465975	0.0316185
HLF	ENSG00000108924	-0.580356	4.15339	0.0316569
SPON2	ENSG00000159674	-0.964084	9.4665	0.0316569
RP11-429J17.7	ENSG00000254973	-1.49106	0.300802	0.0318546
STX2	ENSG00000111450	-0.713963	3.8082	0.0318546
IQGAP2	ENSG00000145703	0.666586	5.06855	0.0318546
BTG1	ENSG00000133639	-0.504213	6.2007	0.0318546
ESRP2	ENSG00000103067	0.677083	6.53874	0.0319624
TBC1D7	ENSG00000145979	-0.857602	4.30698	0.0319624
IFNGR2	ENSG00000159128	-0.478977	5.43653	0.0323909
C12ORF65	ENSG00000130921	-0.590757	4.81666	0.032631
ZNF322	ENSG00000181315	0.878703	4.29582	0.0326353
RP1-172N19.5	ENSG00000269911	-1.61817	0.654073	0.0327677
GNG4	ENSG00000168243	-1.06826	2.00664	0.0328609
HECA	ENSG00000112406	-0.716754	3.89571	0.0328962
TRDMT1	ENSG00000107614	0.805557	3.25289	0.0330601
SH3GLB1	ENSG00000097033	-0.513751	4.74484	0.0330601
RP11-44F14.8	ENSG00000262714	-1.27958	2.29575	0.0332201
AGAP12P	ENSG00000265018	0.819985	2.77345	0.0335991
SLC7A11	ENSG00000151012	0.821096	6.75786	0.0336479
LAMA3	ENSG00000053747	0.763774	7.09864	0.033713
ITPR3	ENSG00000096433	-0.818912	5.36796	0.034257
TMSB4XP4	ENSG00000223551	-1.21181	1.88437	0.0348312
RP11-291L22.9	ENSG00000276805	0.780665	3.35394	0.0348497
EPN2	ENSG00000072134	0.536051	5.18996	0.0355185
PDE4A	ENSG00000065989	-1.36568	0.515662	0.0355185
TGFBR1	ENSG00000106799	-0.662233	4.49928	0.0355892
DR1	ENSG00000117505	0.547105	6.53226	0.0355892
AOC3	ENSG00000131471	0.806913	2.53827	0.0360925
PMS2CL	ENSG00000187953	-0.52068	5.07062	0.0364603
ZYX	ENSG00000159840	-0.739865	5.67785	0.0366966
APH1A	ENSG00000117362	0.6435	6.72504	0.0367876
HERC3	ENSG00000138641	0.526546	6.97362	0.0367876
IQSEC1	ENSG00000144711	-0.676429	5.30489	0.0369325
GOSR1	ENSG00000108587	0.433053	5.93948	0.0369953
SPOPL	ENSG00000144228	-0.589079	4.95905	0.036997
PRRC1	ENSG00000164244	0.444376	6.6105	0.036997
YWHAZP5	ENSG00000213260	0.60191	3.48597	0.0377078
FAM49A	ENSG00000197872	-1.12286	1.42814	0.0384193
RALGAPA1	ENSG00000174373	0.837066	5.31241	0.0384752
ZNF624	ENSG00000197566	0.953652	1.79935	0.0385938
PRRC2C	ENSG00000117523	0.892812	7.55813	0.0385938
FAF2	ENSG00000113194	-0.481352	7.14492	0.0385938
ZNF680	ENSG00000173041	-0.703609	5.37182	0.0385938
SLC35E1	ENSG00000127526	-0.353515	6.67011	0.0387814
RP11-73M18.8	ENSG00000269958	0.87364	2.82658	0.0387814
MMD	ENSG00000108960	0.43302	5.53993	0.0389944
NCKAP1	ENSG00000061676	0.694474	6.81495	0.0394943
ATG14	ENSG00000126775	0.634603	4.14516	0.0394943
NDRG1	ENSG00000104419	-0.593634	5.81492	0.0395461
AKTIP	ENSG00000166971	-0.466977	6.10134	0.039591
MTURN	ENSG00000180354	-0.600778	3.95922	0.0399785
INPP5A	ENSG00000068383	-0.434517	5.73399	0.0402136
LINC01579	ENSG00000258754	1.11659	1.36155	0.0404666
NPTXR	ENSG00000221890	-0.603663	4.42603	0.0405006
CTC-338M12.5	ENSG00000250222	-1.09793	2.63766	0.0405006
TP73	ENSG00000078900	-1.23318	1.91647	0.0408092
LINC00094	ENSG00000235106	-0.528685	5.6345	0.0409117
CLIP2	ENSG00000106665	-1.42224	1.33327	0.0412434
MBNL2	ENSG00000139793	1.00753	3.1408	0.0414519
KIAA1324	ENSG00000116299	-0.829478	2.50383	0.0416201
PPP1R18	ENSG00000146112	-1.07279	1.73856	0.0416201
PLEKHB1	ENSG00000021300	-0.375352	7.02501	0.0416201
GRIN2C	ENSG00000161509	-1.21536	1.67831	0.0418849
NBEAP3	ENSG00000223875	-0.889666	2.50436	0.0419064
APOL3	ENSG00000128284	1.33843	1.01603	0.0421769
RP13-131K19.6	ENSG00000272434	-1.5758	0.603537	0.0421769
CFAP69	ENSG00000105792	-0.674515	4.70216	0.0421769
HTRA2	ENSG00000115317	-0.588909	4.3307	0.0422211
ZNF552	ENSG00000178935	0.530461	4.30692	0.042377
KEAP1	ENSG00000079999	0.663039	6.71192	0.042377
RNF144A	ENSG00000151692	-0.588162	3.79473	0.042377
GPC3	ENSG00000147257	-0.929022	2.34649	0.042377
ADIPOR1	ENSG00000159346	-0.413884	6.94777	0.042377
PACRG	ENSG00000112530	-1.40495	0.965897	0.042377
C6ORF106	ENSG00000196821	0.506305	6.26713	0.0425779
COQ2	ENSG00000173085	-0.446913	5.05609	0.0426605
CARS2	ENSG00000134905	-0.499396	5.71417	0.0426605
FBXO2	ENSG00000116661	-0.926781	4.53375	0.0426832
SPTLC1	ENSG00000090054	-0.640832	5.25031	0.0426832
PLXDC2	ENSG00000120594	-0.816308	3.6938	0.0426832
MIR22HG	ENSG00000186594	0.690028	2.8226	0.0426832
RP11-488L18.4	ENSG00000227671	0.873099	3.40846	0.0431585
GCNT1	ENSG00000187210	-0.463574	5.25032	0.0431585
XIAP	ENSG00000101966	0.75335	6.01372	0.0431585
IDI1	ENSG00000067064	0.496834	7.1306	0.0431585
ZDHHC20	ENSG00000180776	-0.807725	5.52892	0.0431585
FANCC	ENSG00000158169	-0.50903	4.94117	0.0432031
ATF2	ENSG00000115966	-0.523227	4.72482	0.0432031
COX15	ENSG00000014919	0.420461	5.42927	0.0432031
CLEC7A	ENSG00000172243	0.569938	4.08682	0.0432046
PWP2	ENSG00000241945	-0.495323	4.54467	0.0434636
MAP3K5	ENSG00000197442	0.603551	4.49725	0.0442468
CRYM	ENSG00000103316	1.08302	1.21259	0.044249
HMGCS1	ENSG00000112972	0.425142	7.64951	0.0443402
RALB	ENSG00000144118	-0.451224	5.6384	0.0445688
DEUP1	ENSG00000165325	1.28319	0.828654	0.044868
RUNDC3A-AS1	ENSG00000267750	-0.918094	2.72697	0.0450056
ZNF25	ENSG00000175395	0.679237	3.25959	0.0450056
ATP8B5P	ENSG00000179766	-0.886887	1.71317	0.0450056
DDHD2	ENSG00000085788	0.585291	5.31133	0.0450163
NPPC	ENSG00000163273	-1.99234	0.120248	0.045024
C17ORF80	ENSG00000141219	0.578446	4.82437	0.0452843
CERS4	ENSG00000090661	-0.58164	5.73484	0.0455419
LINC01128	ENSG00000228794	0.596886	5.10101	0.0455419
STK39	ENSG00000198648	0.398134	6.51054	0.0455641
TSPY4	ENSG00000233803	-1.23188	0.854169	0.0455641
CCDC7	ENSG00000216937	0.882592	1.76441	0.0457314
USP1	ENSG00000162607	-0.54638	6.19723	0.0458306
MPP2	ENSG00000108852	-0.567563	6.208	0.0458306
LIN37	ENSG00000267796	-1.63076	0.258331	0.0458306
RP11-135F9.3	ENSG00000280088	-0.926781	2.55373	0.0461504
CLCN3	ENSG00000109572	0.523221	7.59484	0.0462037
ZNF618	ENSG00000157657	-0.785255	4.65553	0.0462761
CDH24	ENSG00000139880	-0.92608	3.60472	0.0462956
GSTO2	ENSG00000065621	0.797788	2.49094	0.0471723
SURF1	ENSG00000148290	-0.715256	6.25	0.0476733
FAM199X	ENSG00000123575	0.493882	6.10793	0.0480069
TMEM138	ENSG00000149483	-0.458694	5.19378	0.048497
CEP290	ENSG00000198707	0.751035	4.35742	0.0488125
TTC21B	ENSG00000123607	0.473775	5.07013	0.0490981
ADGRB2	ENSG00000121753	-0.847496	2.56525	0.0491111
MFN2	ENSG00000116688	0.412462	7.74567	0.0491111
NAV3	ENSG00000067798	0.620395	3.69862	0.0491685
PWAR6	ENSG00000257151	0.943821	4.42256	0.0499127
